# Supplementary material for: Regio- and stereoselective syntheses of allylic thioethers under metal free conditions
Source: Royal Society of Chemistry journal article supplement (doi:10.1039/c7ra04817c), 2017-01-01

## **Regio- and Stereoselective Syntheses of Allylic thioethers Under Metal Free Conditions**

Pratibha Singh, Rekha Bai, Rakhee Choudhary, Mahesh C. Sharma and Satpal Singh Badsara\*

*MFOS Laboratory, Department of Chemistry (Centre of Advanced Study), University of Rajasthan, JLN  
Marg, Jaipur, Rajasthan, India-302004*

<sup>1</sup>H & <sup>13</sup>C NMR spectra of products **4**, **6** & **7**

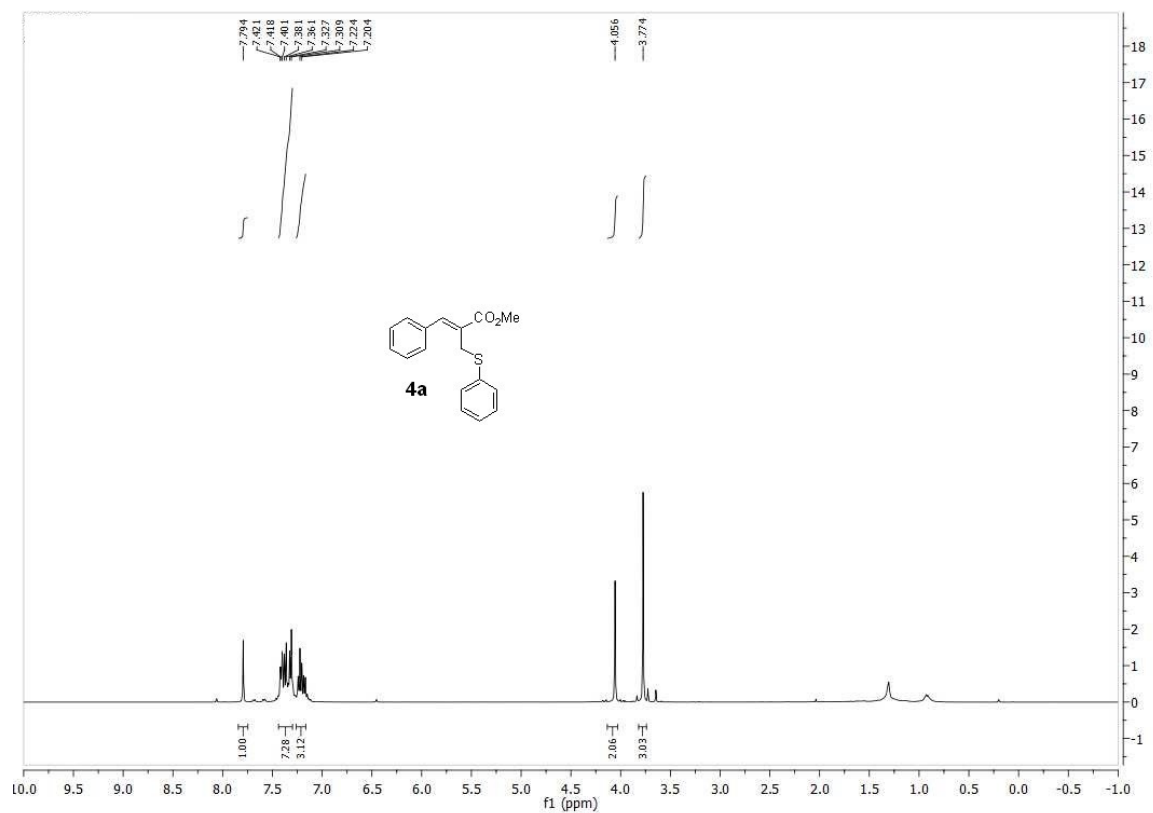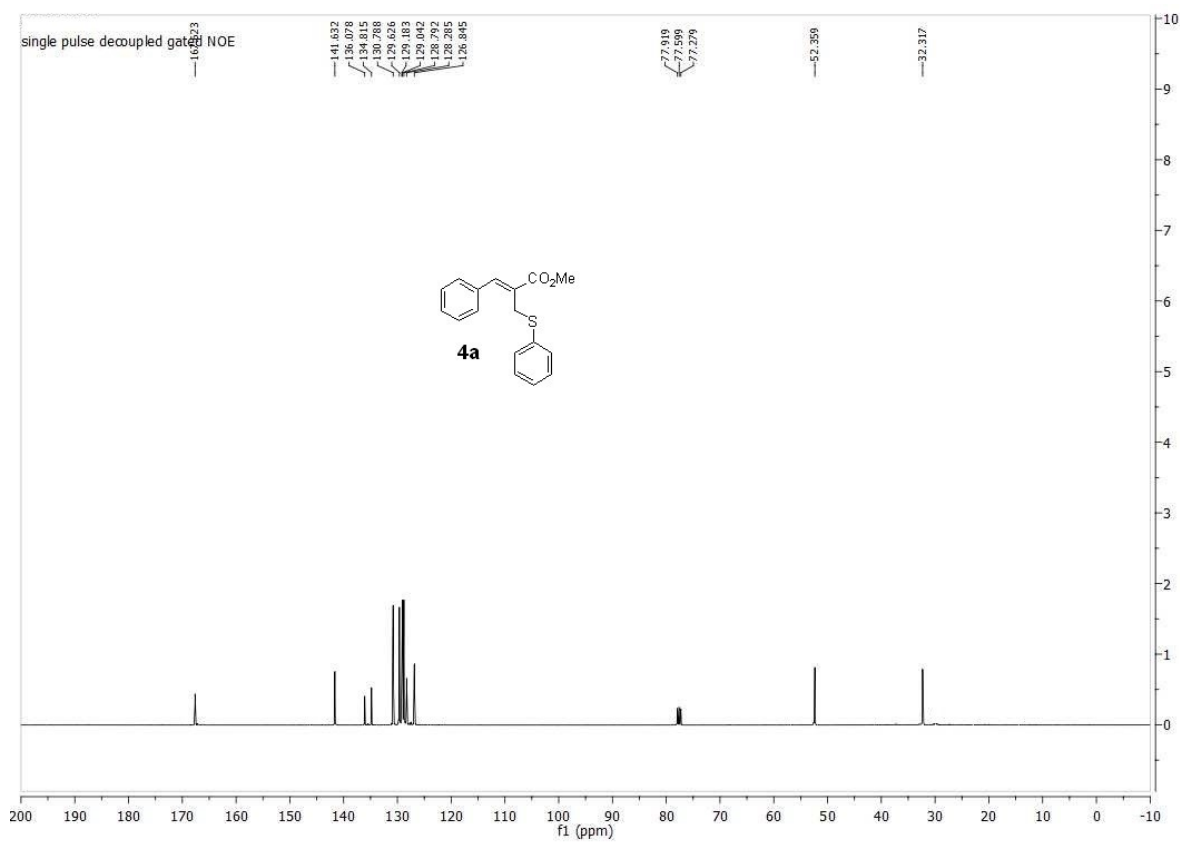

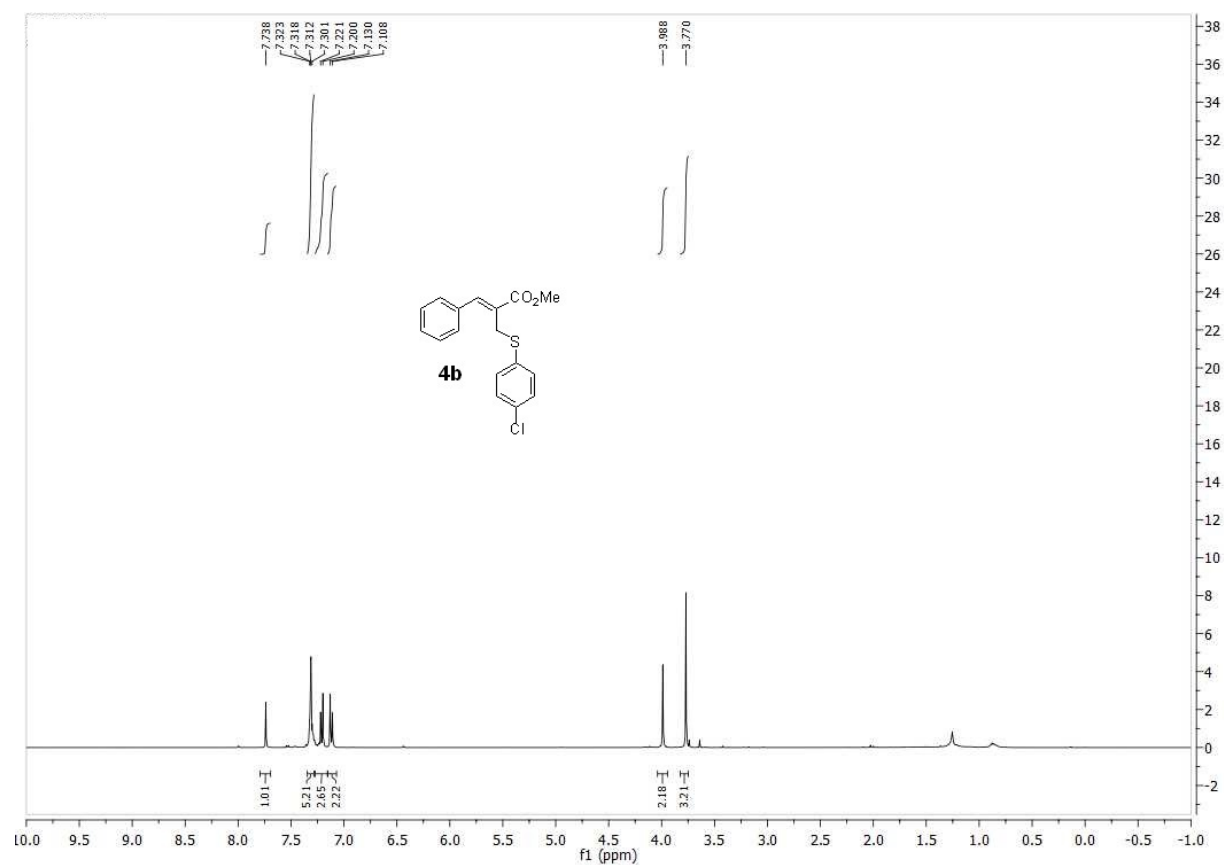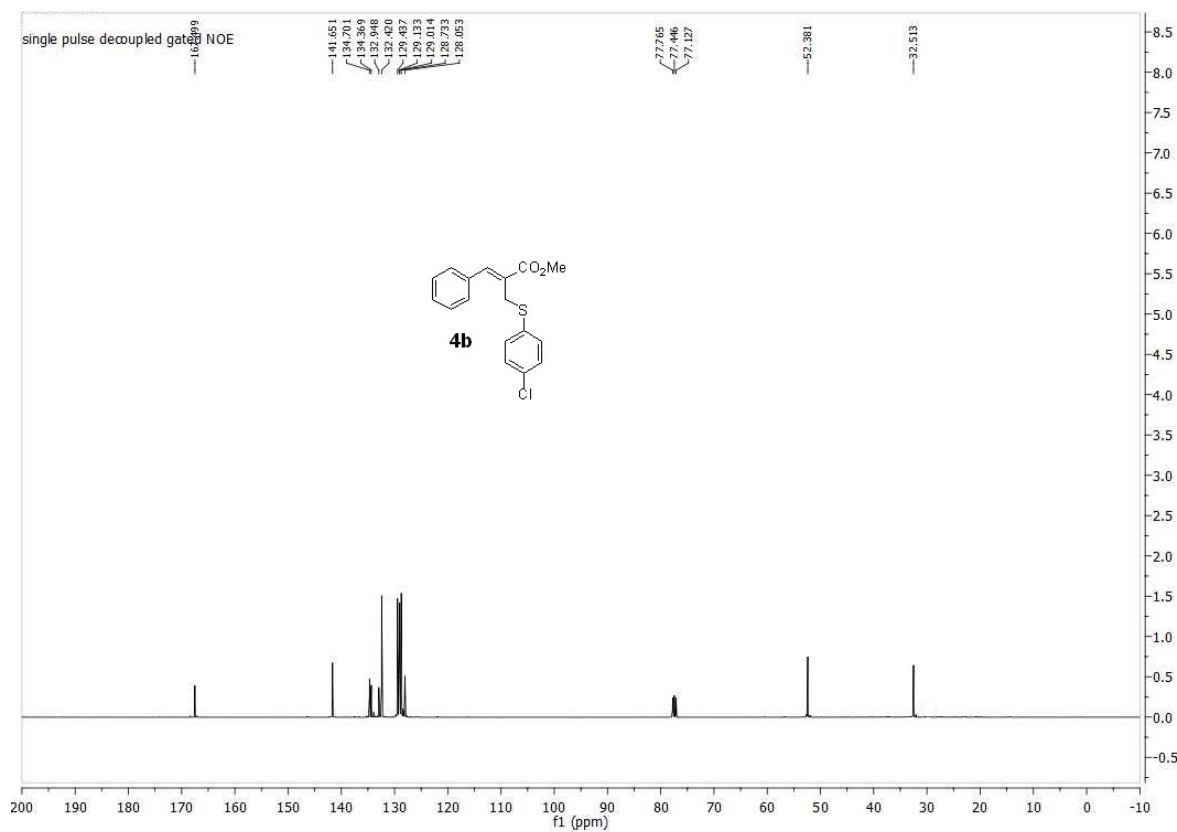

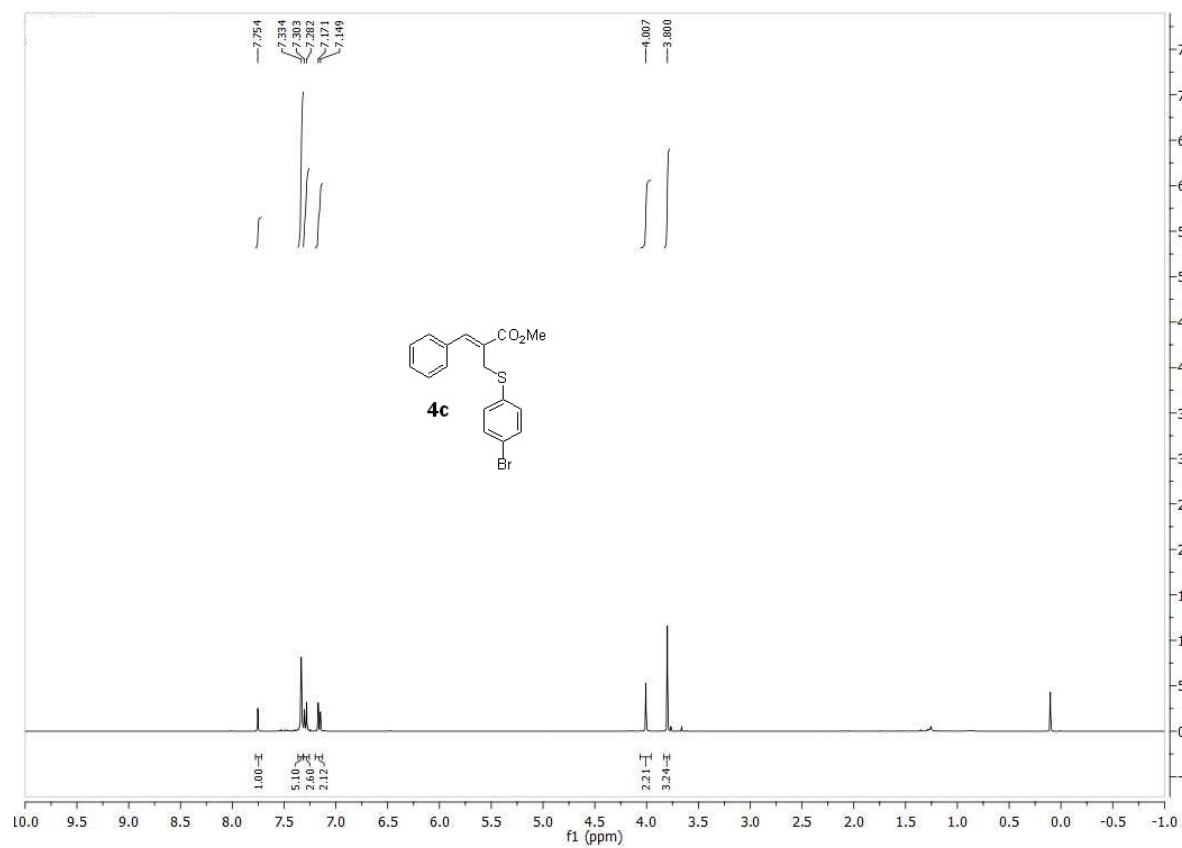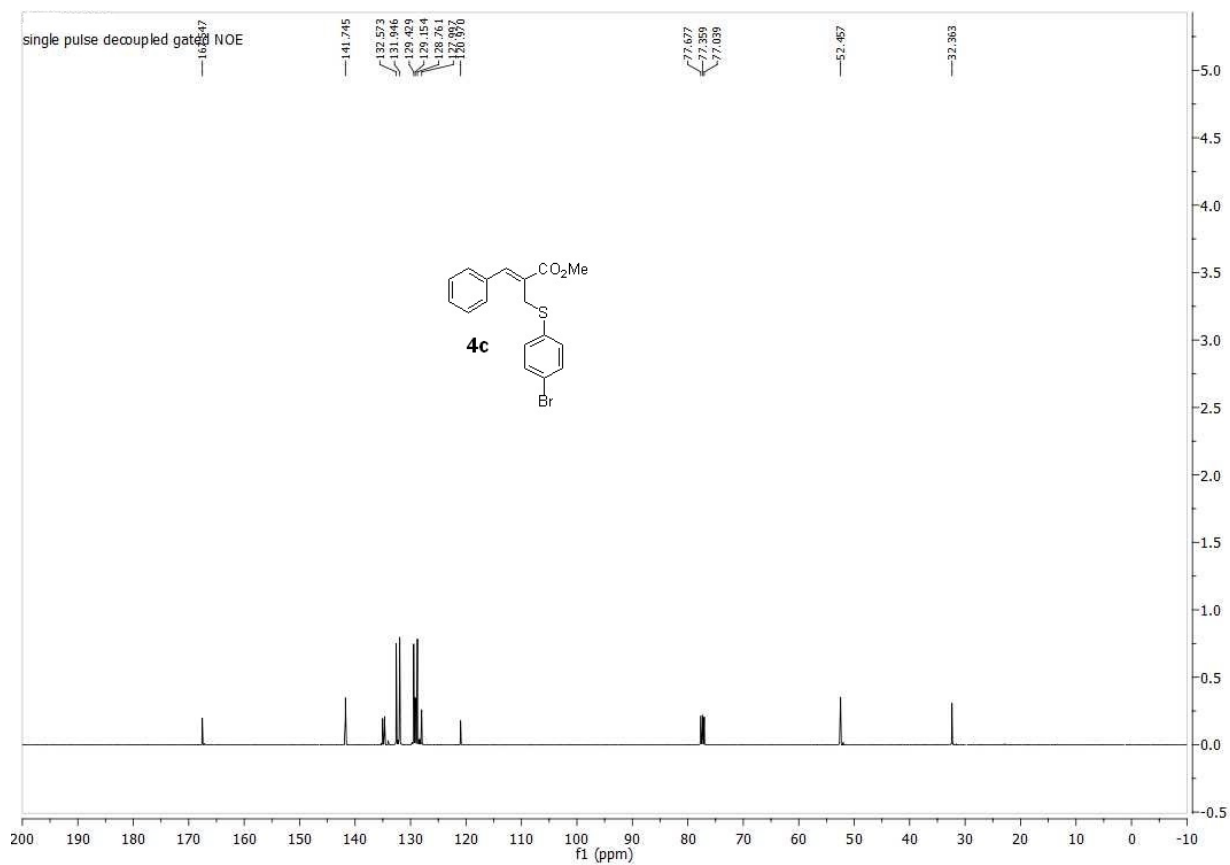



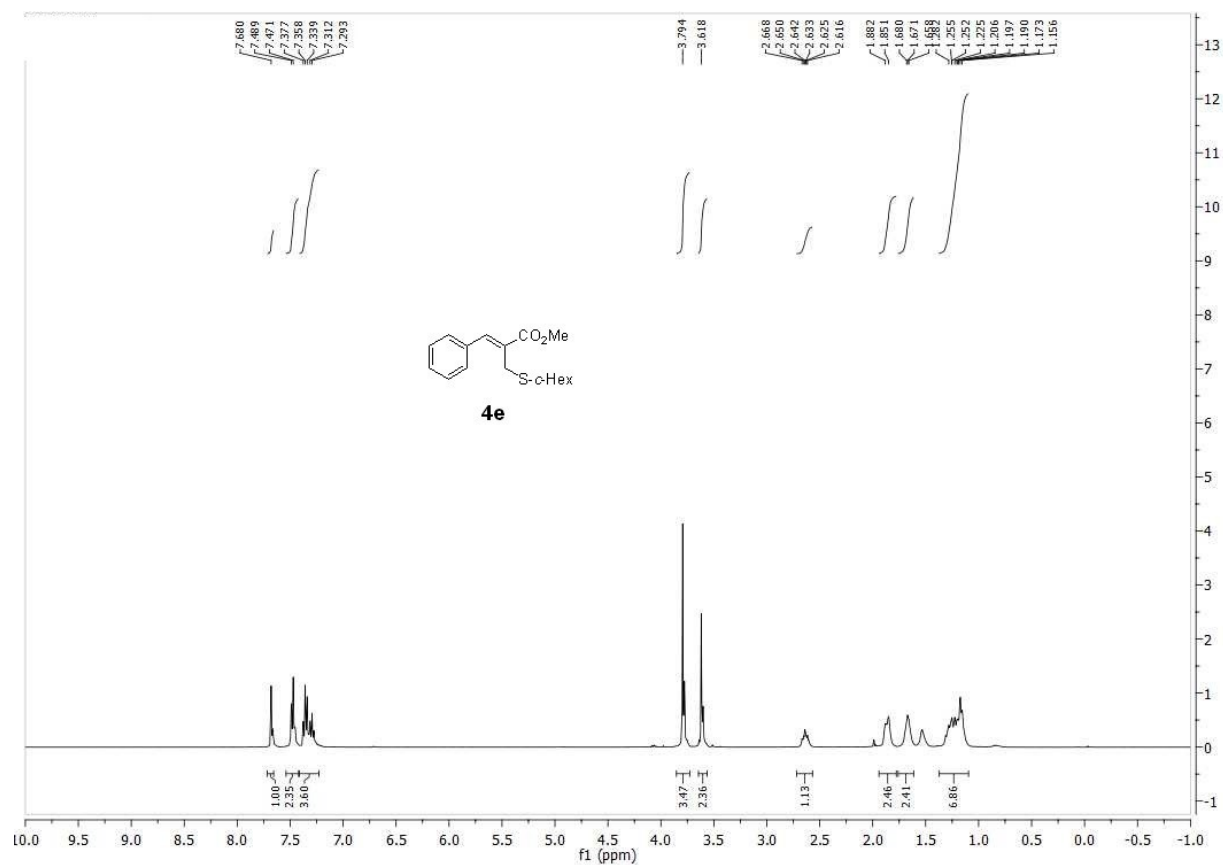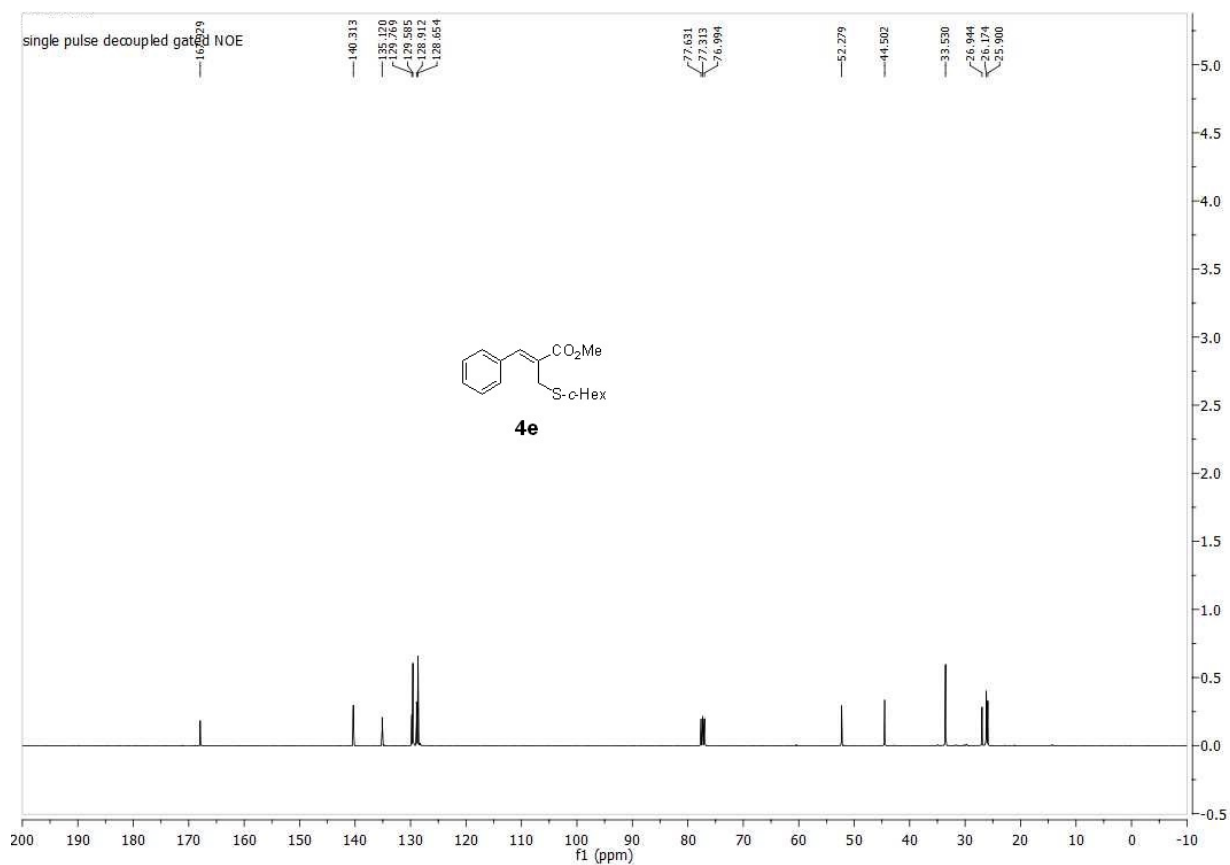

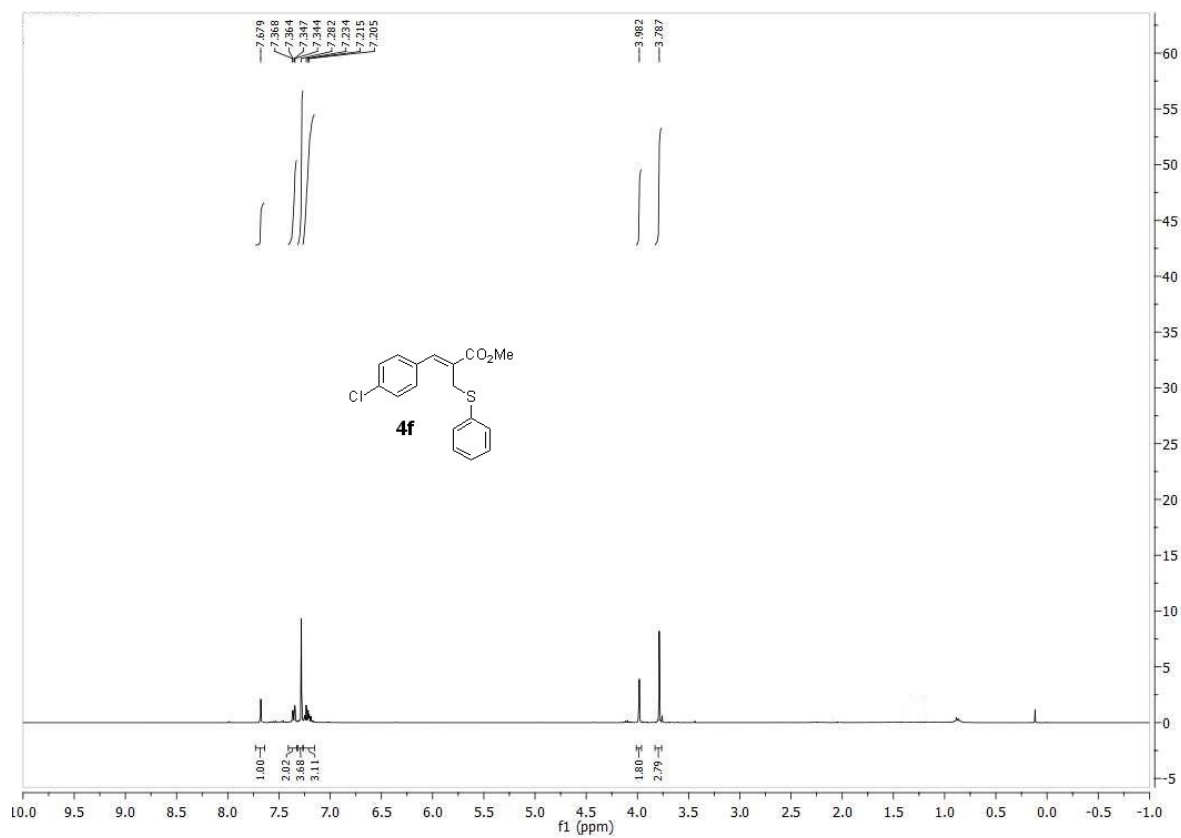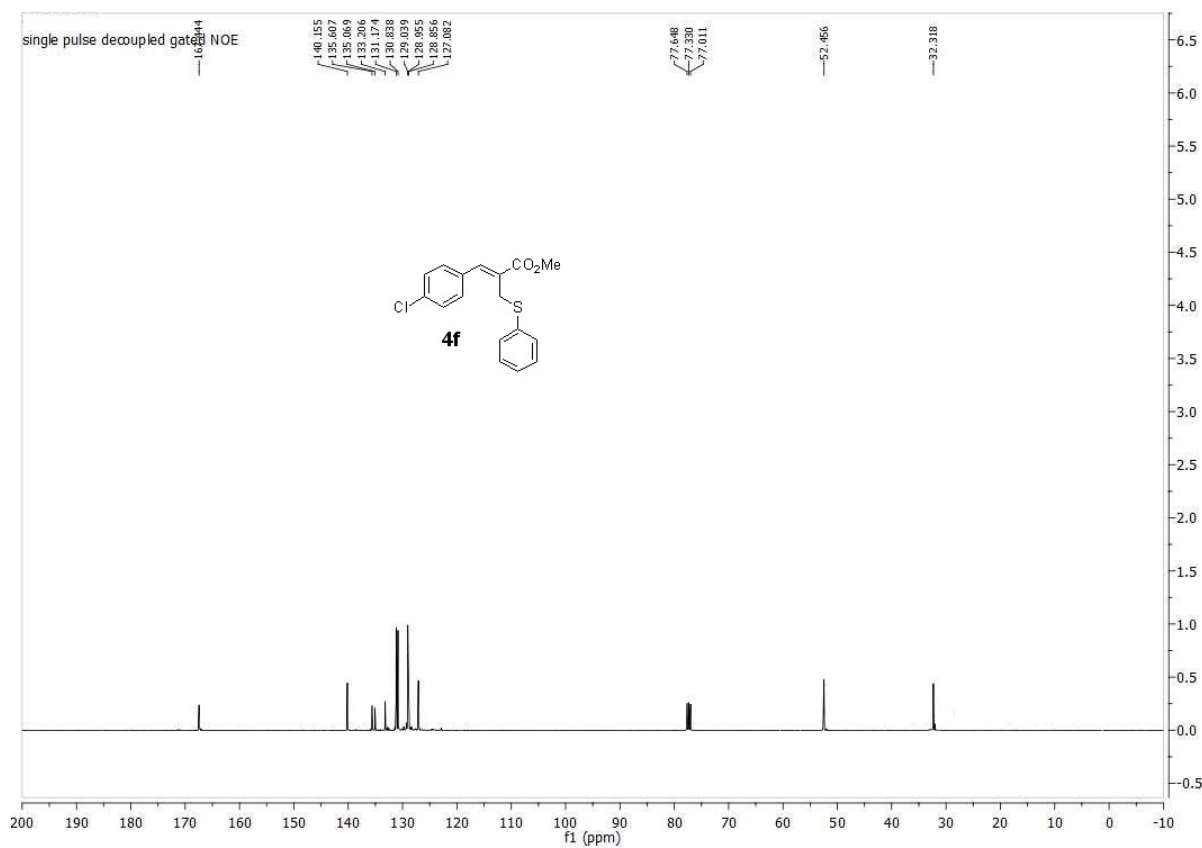

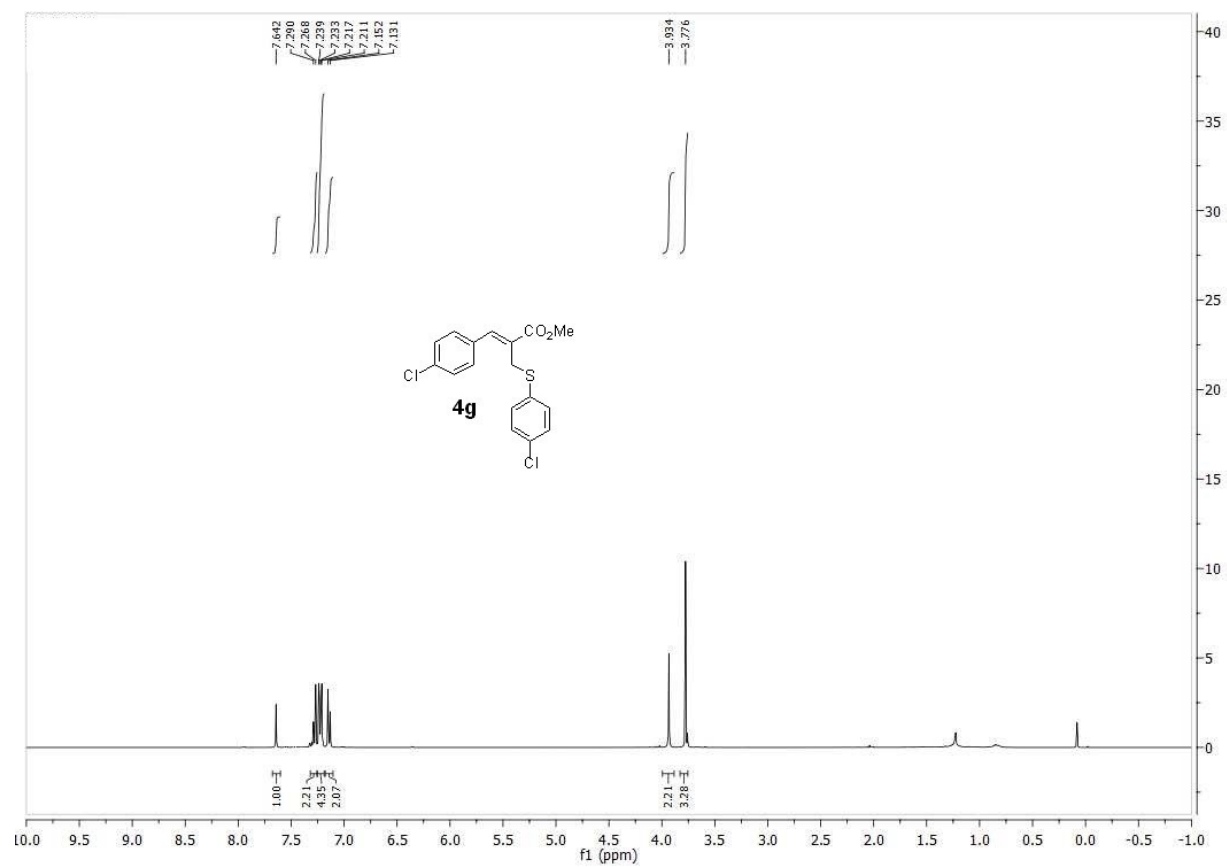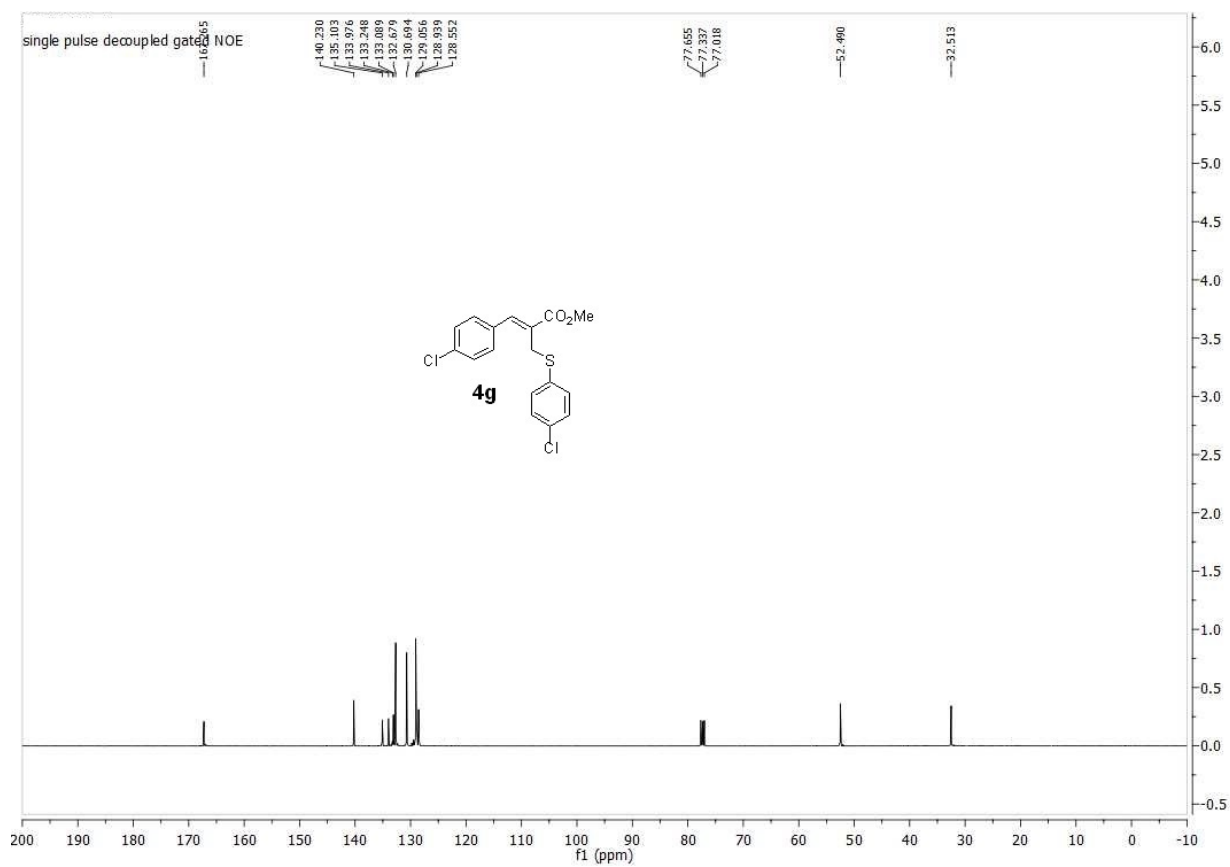



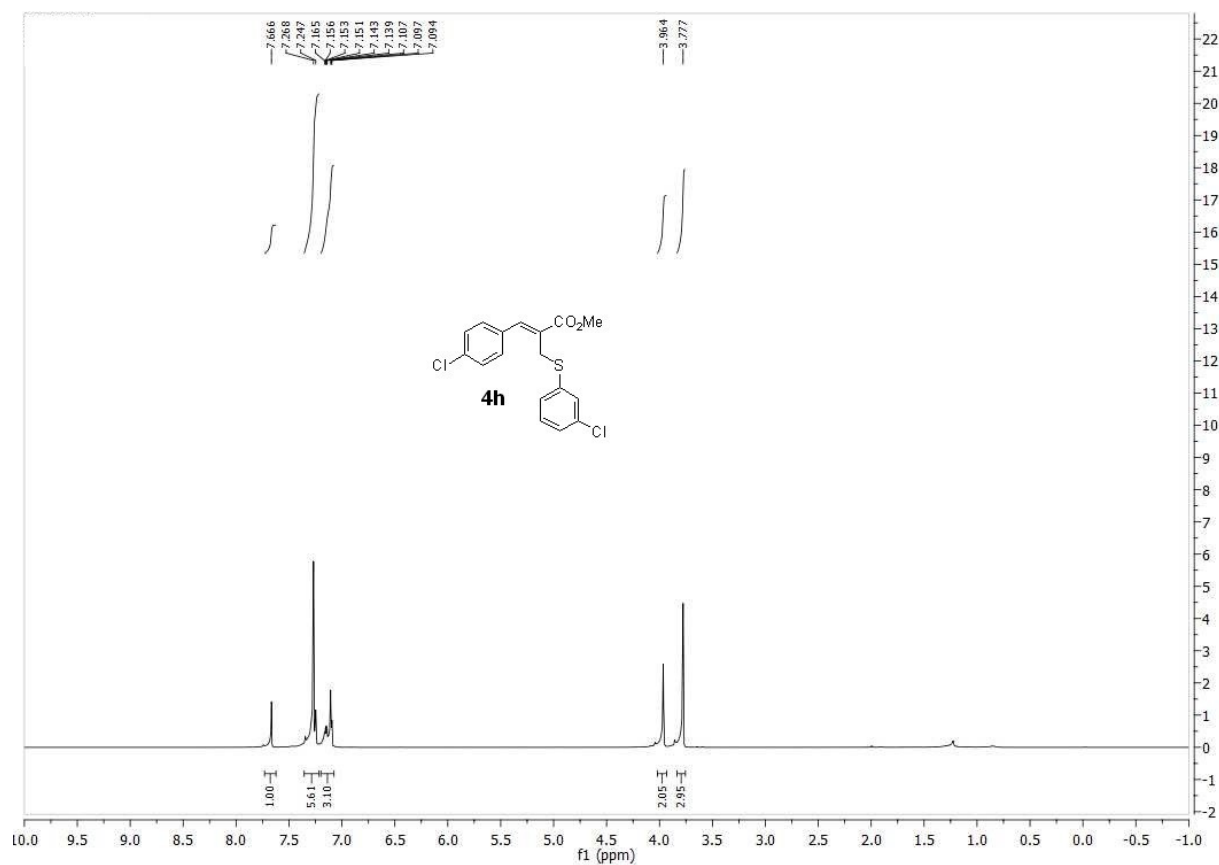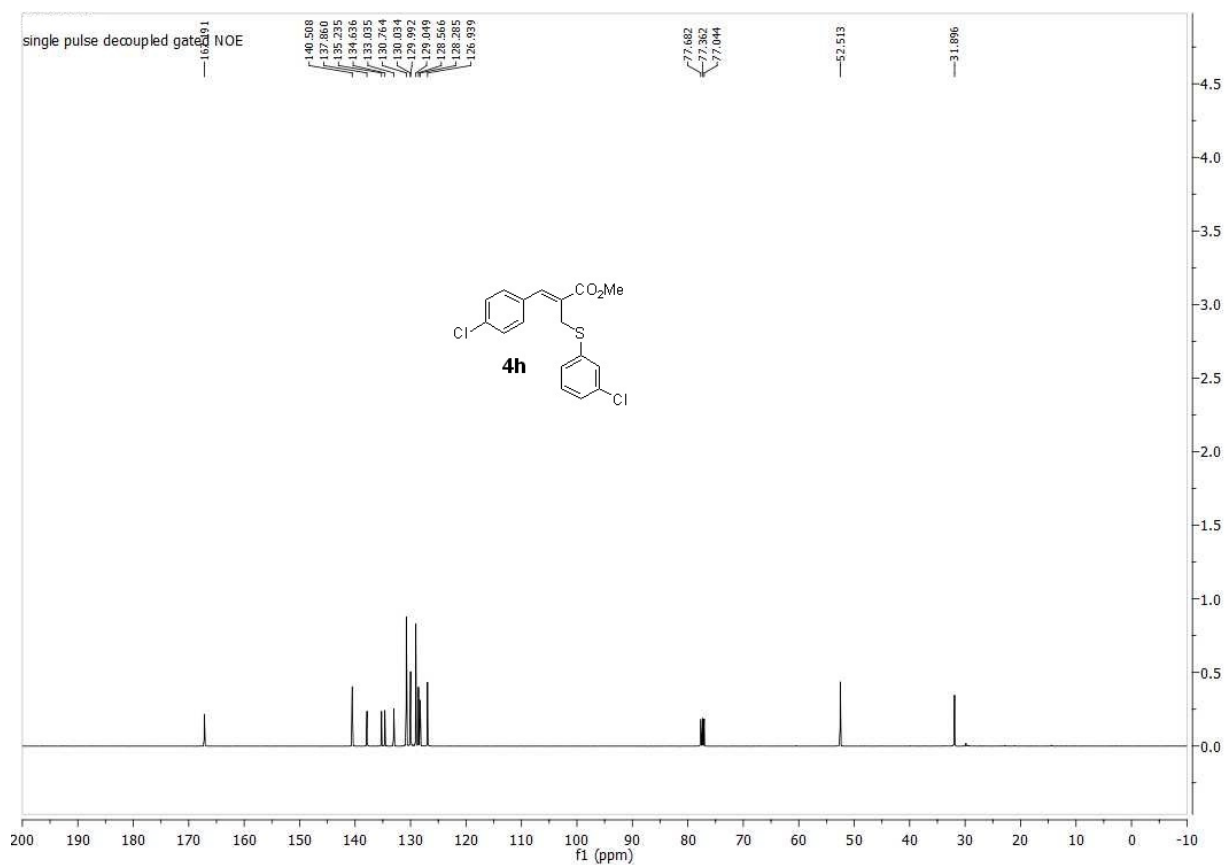

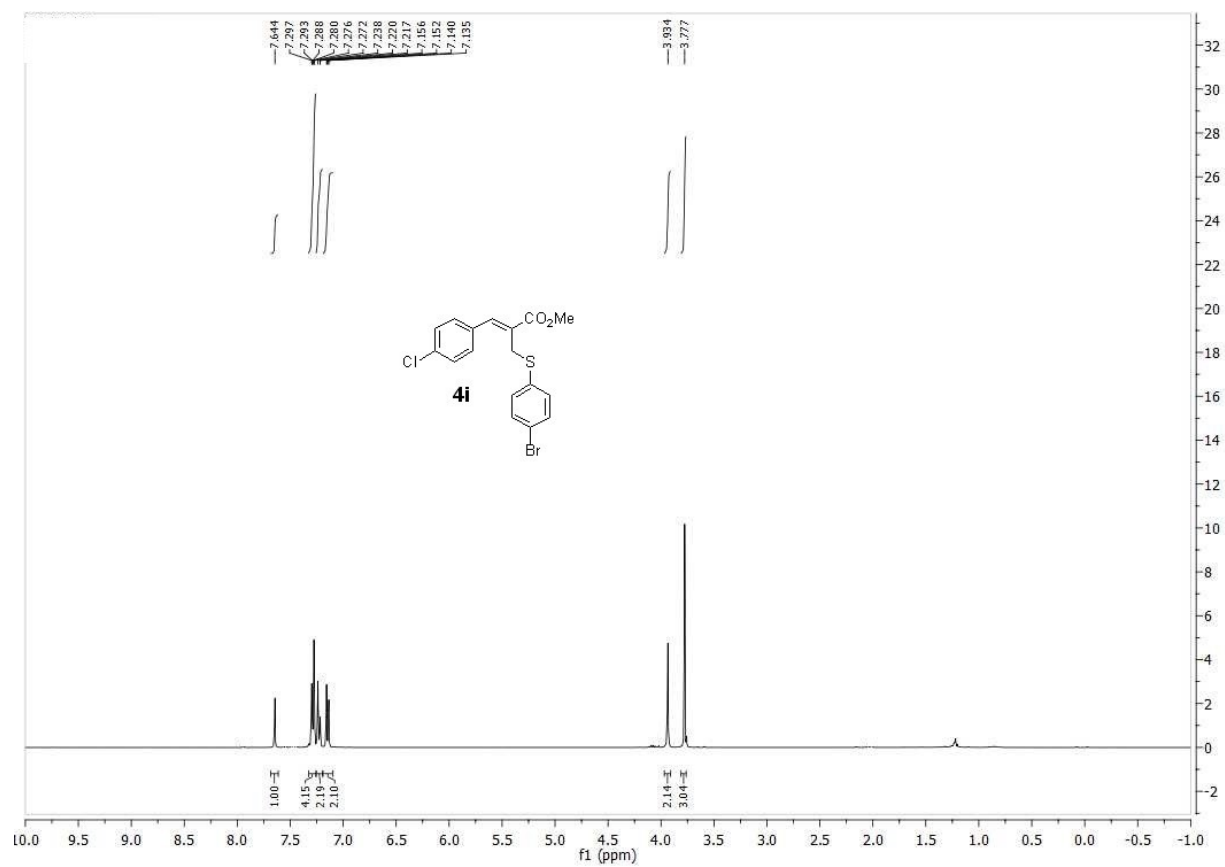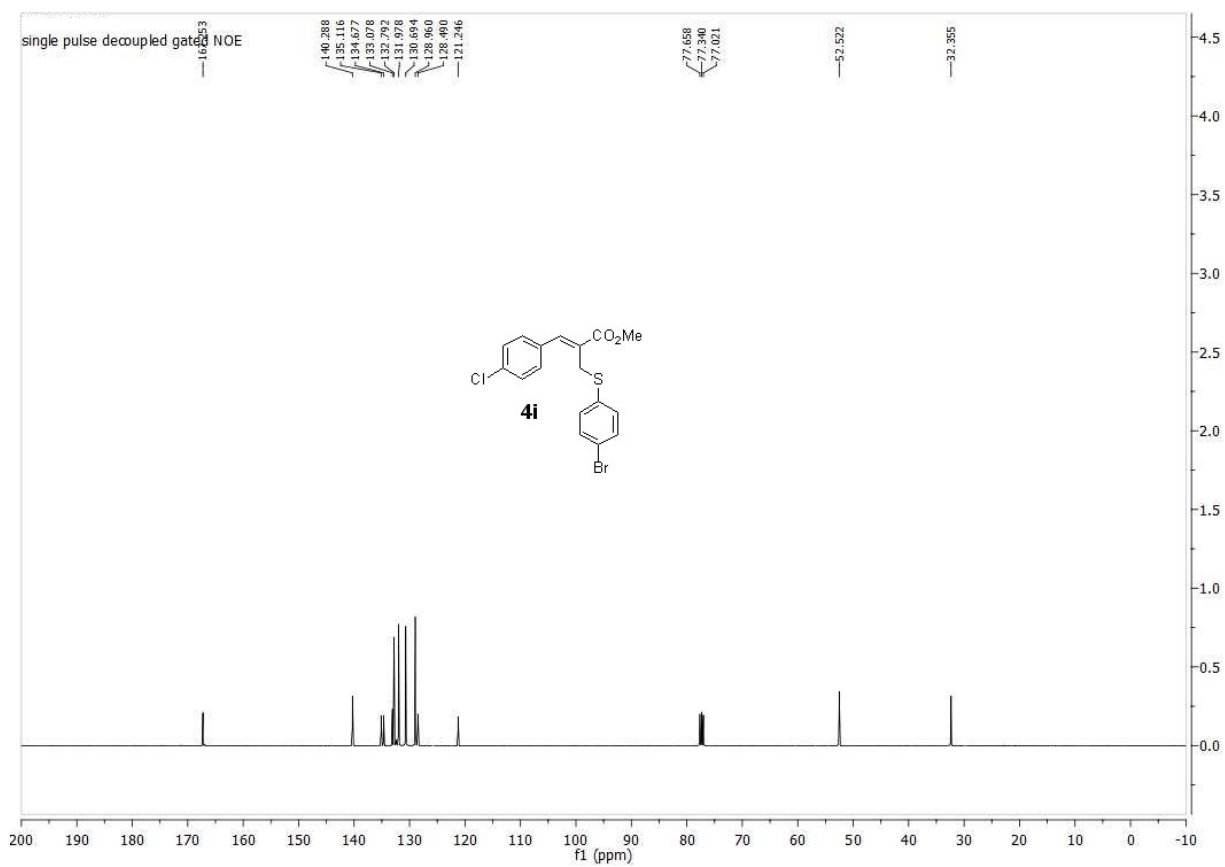

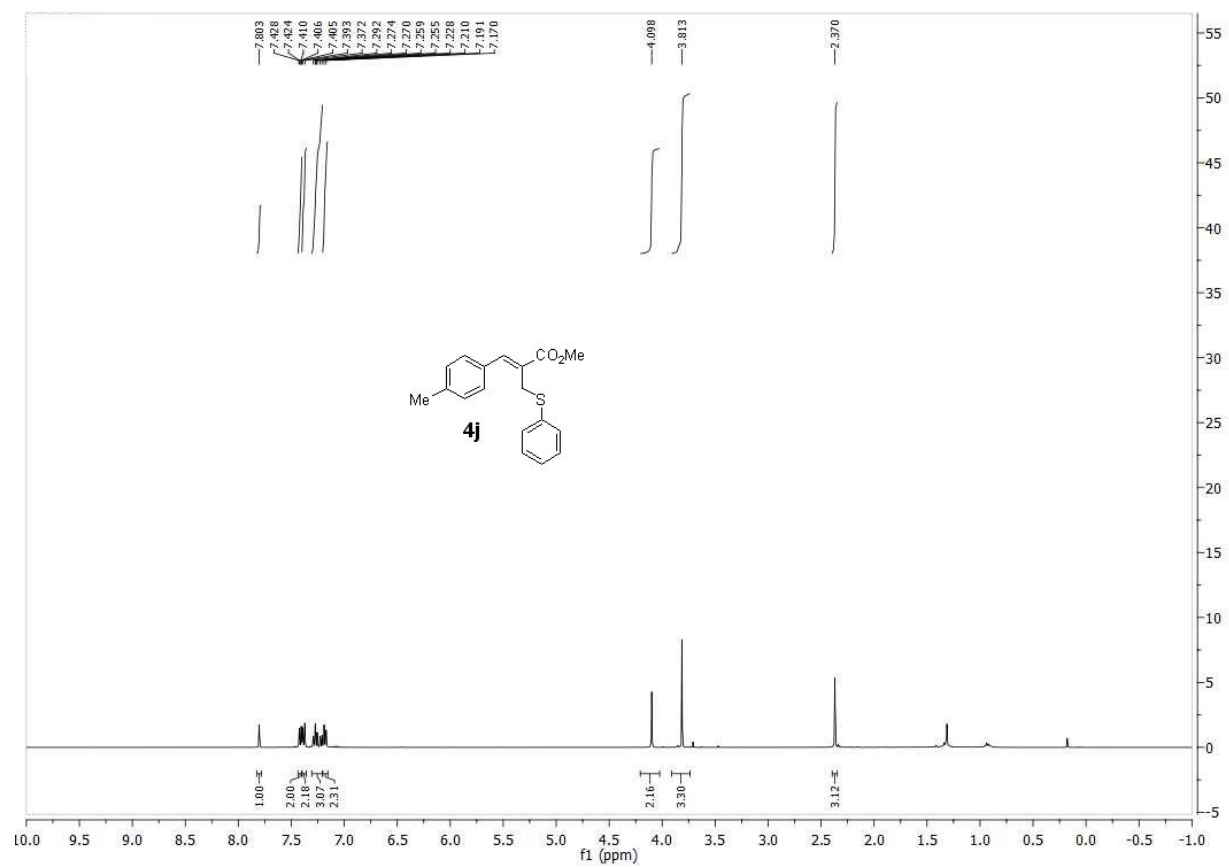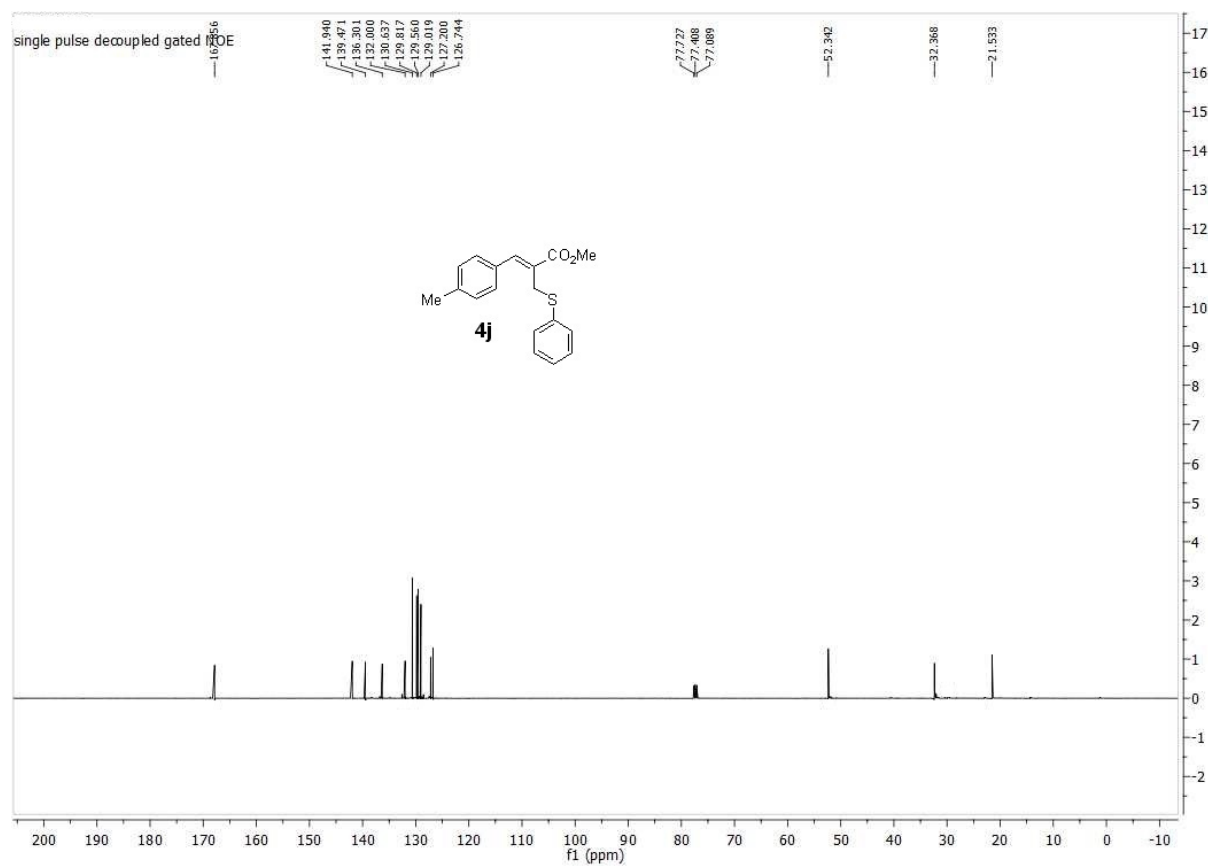

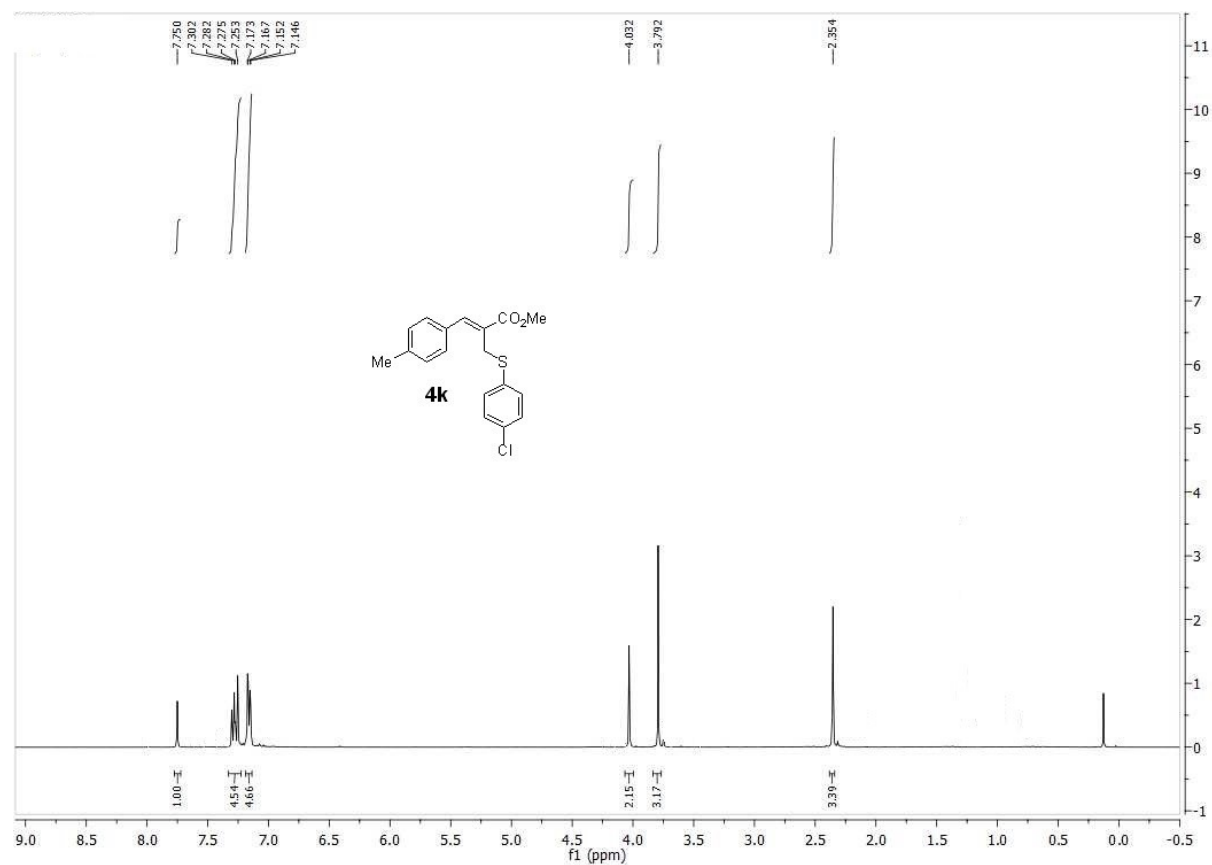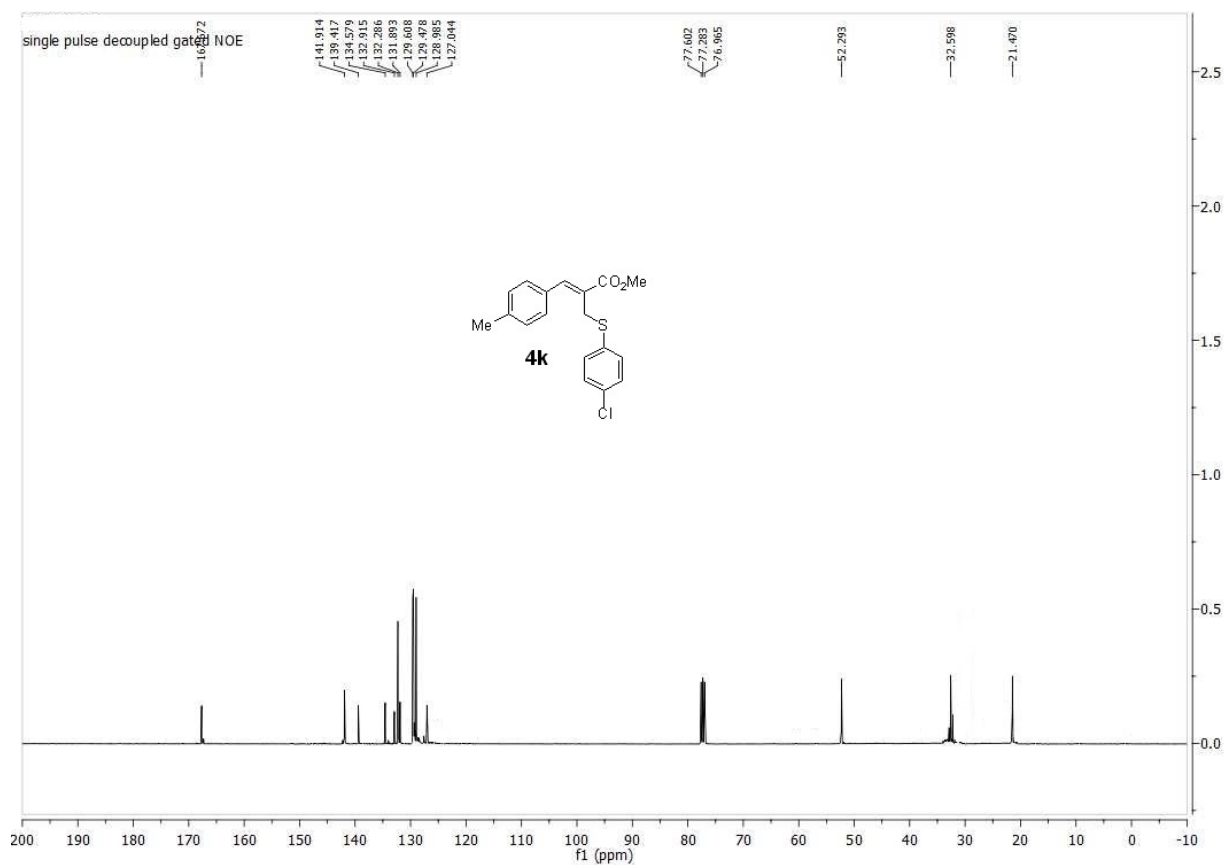

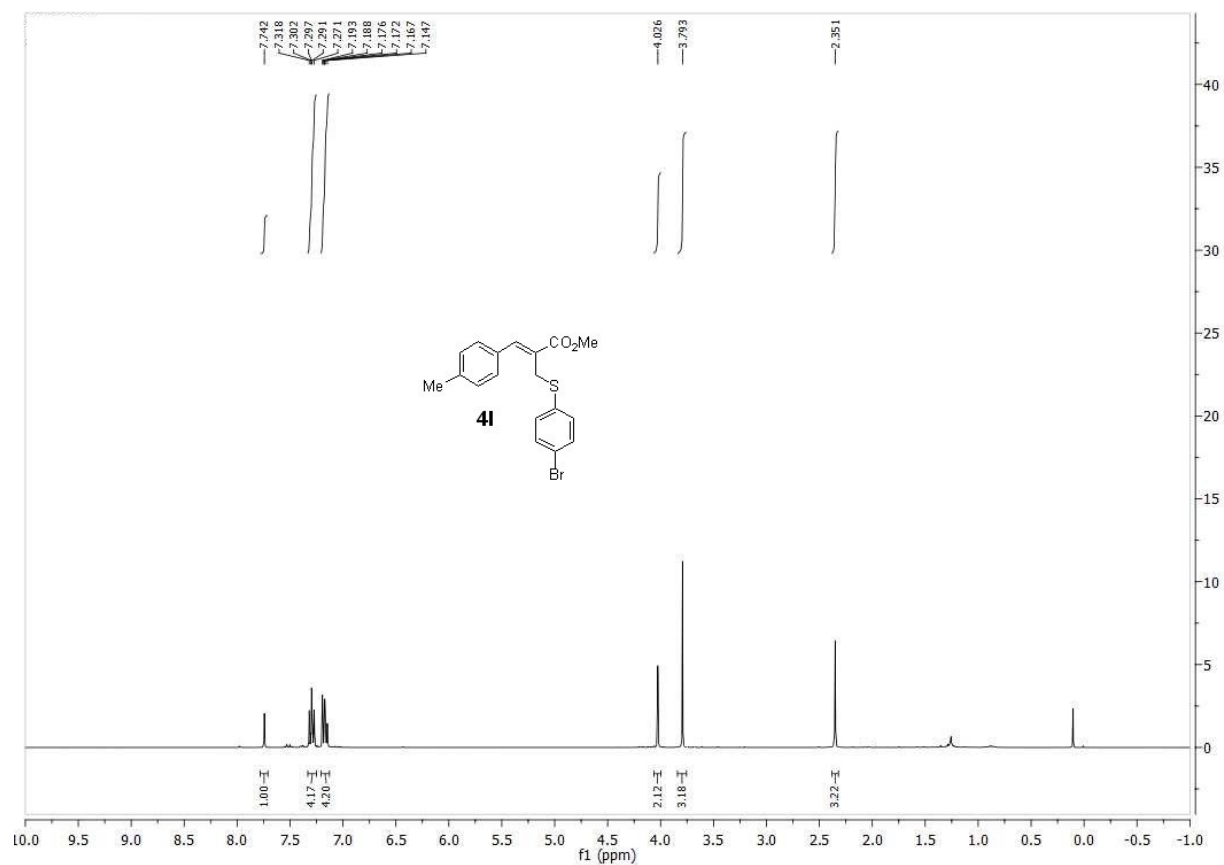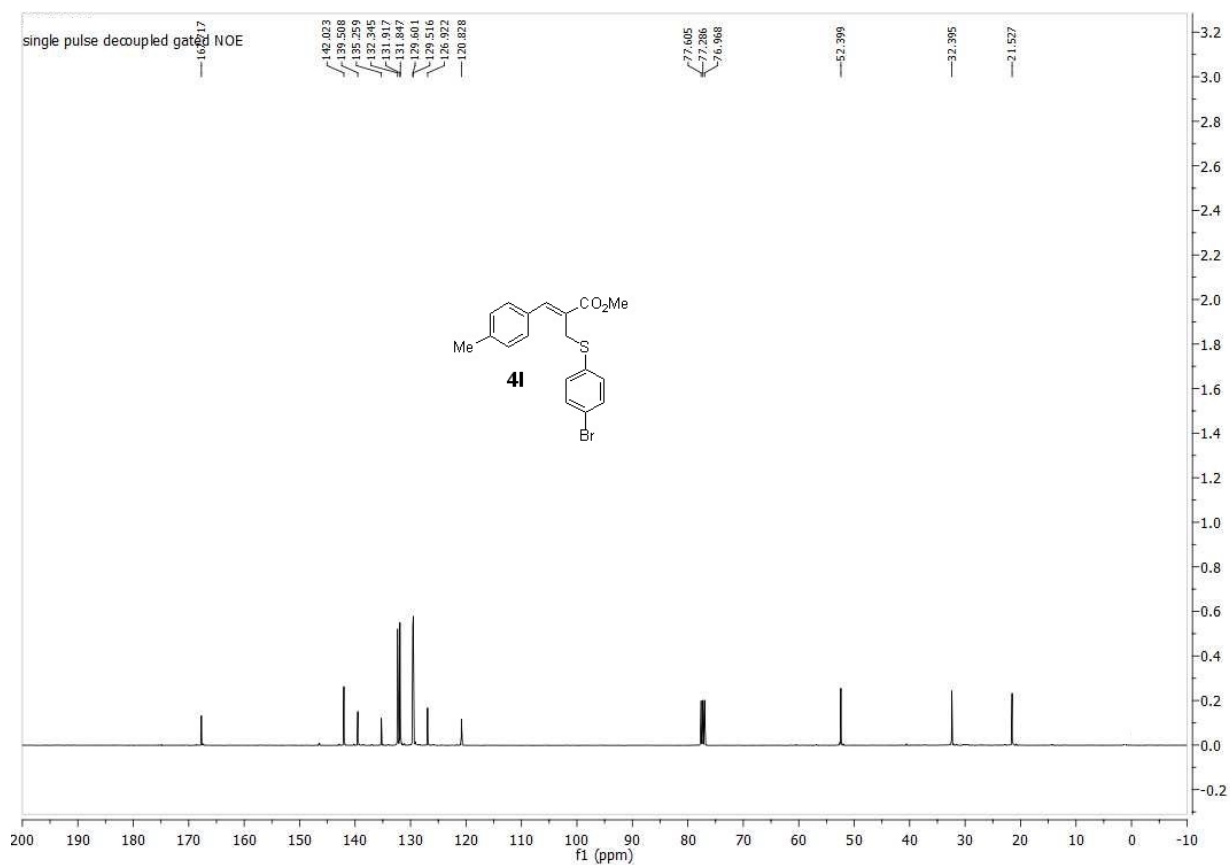

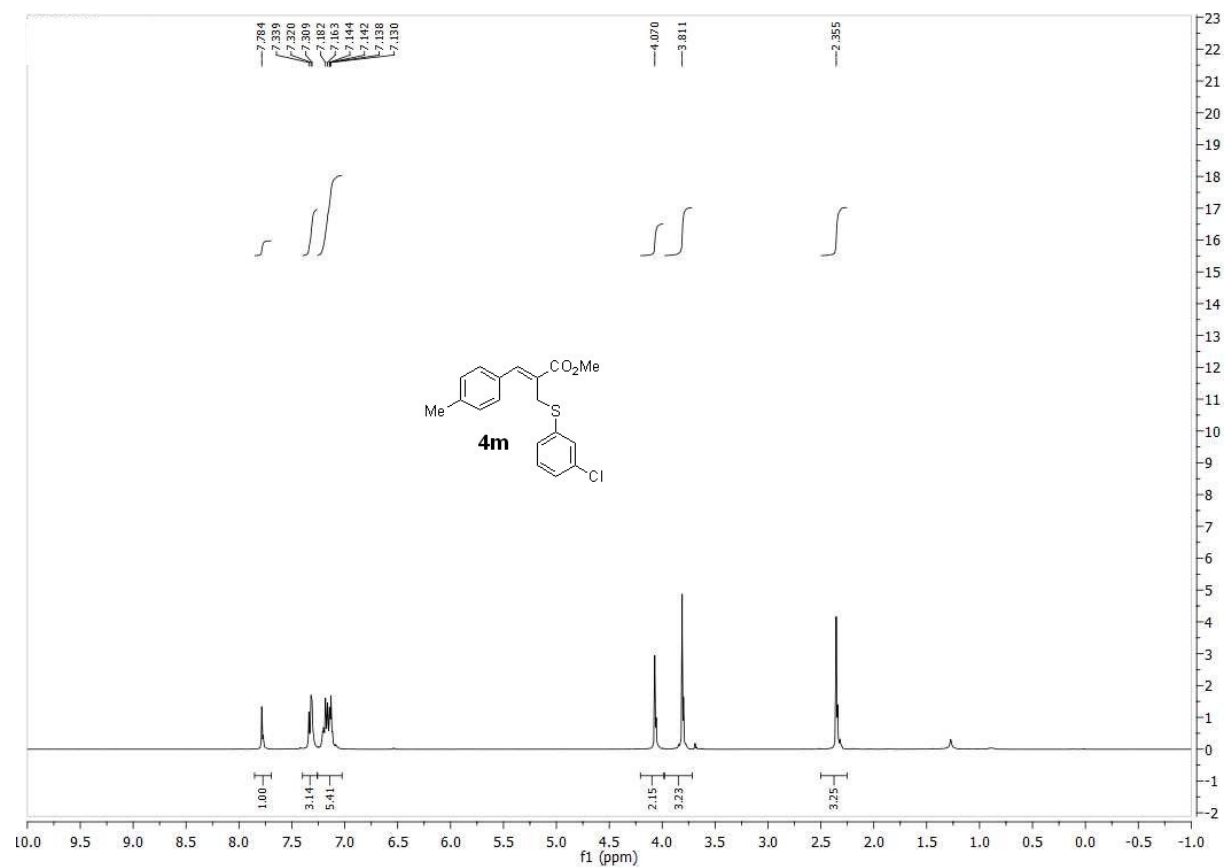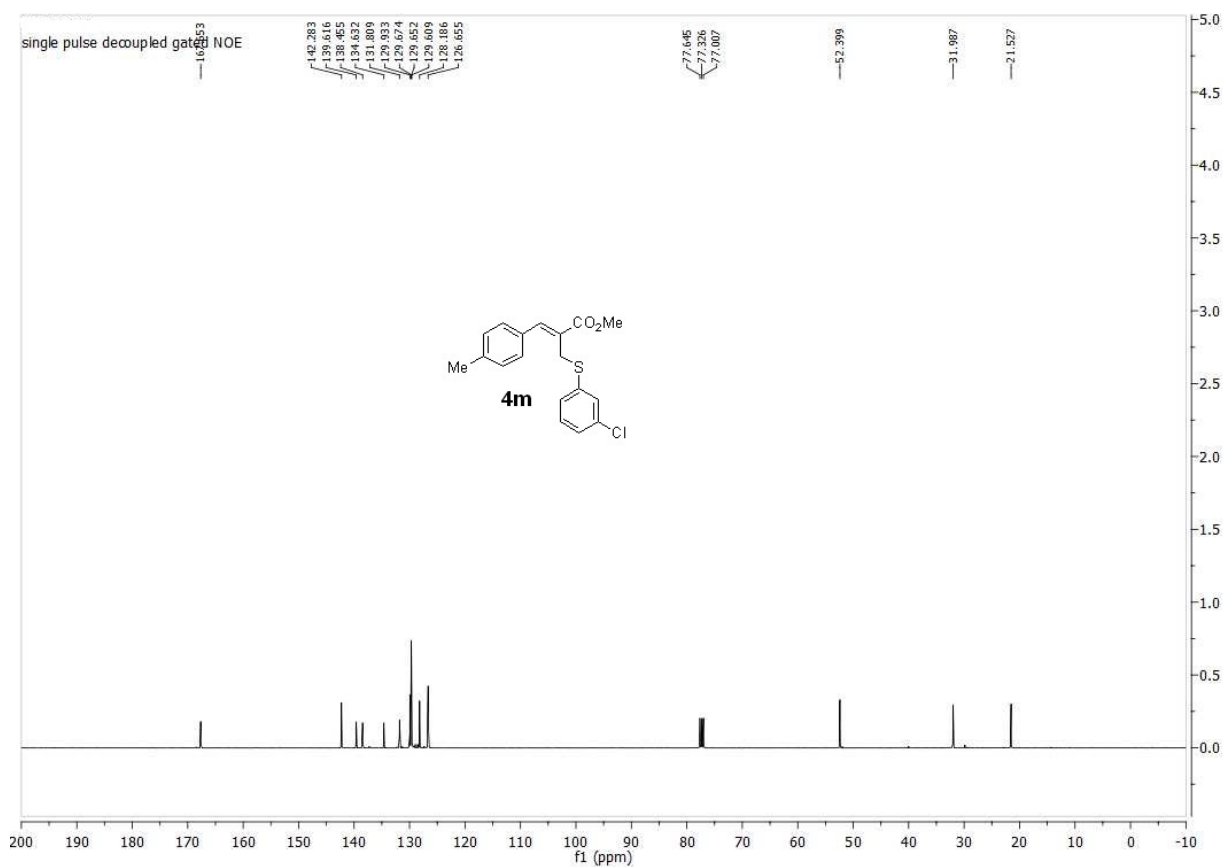

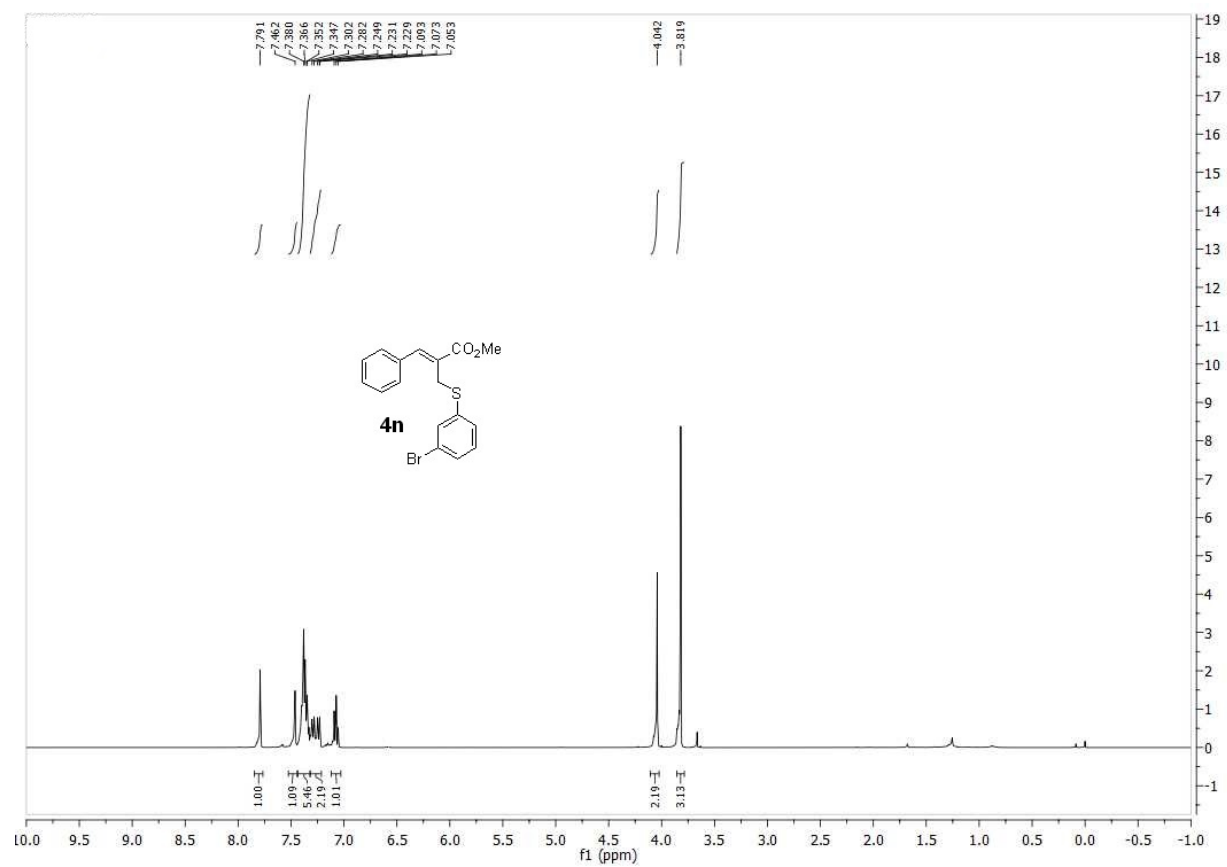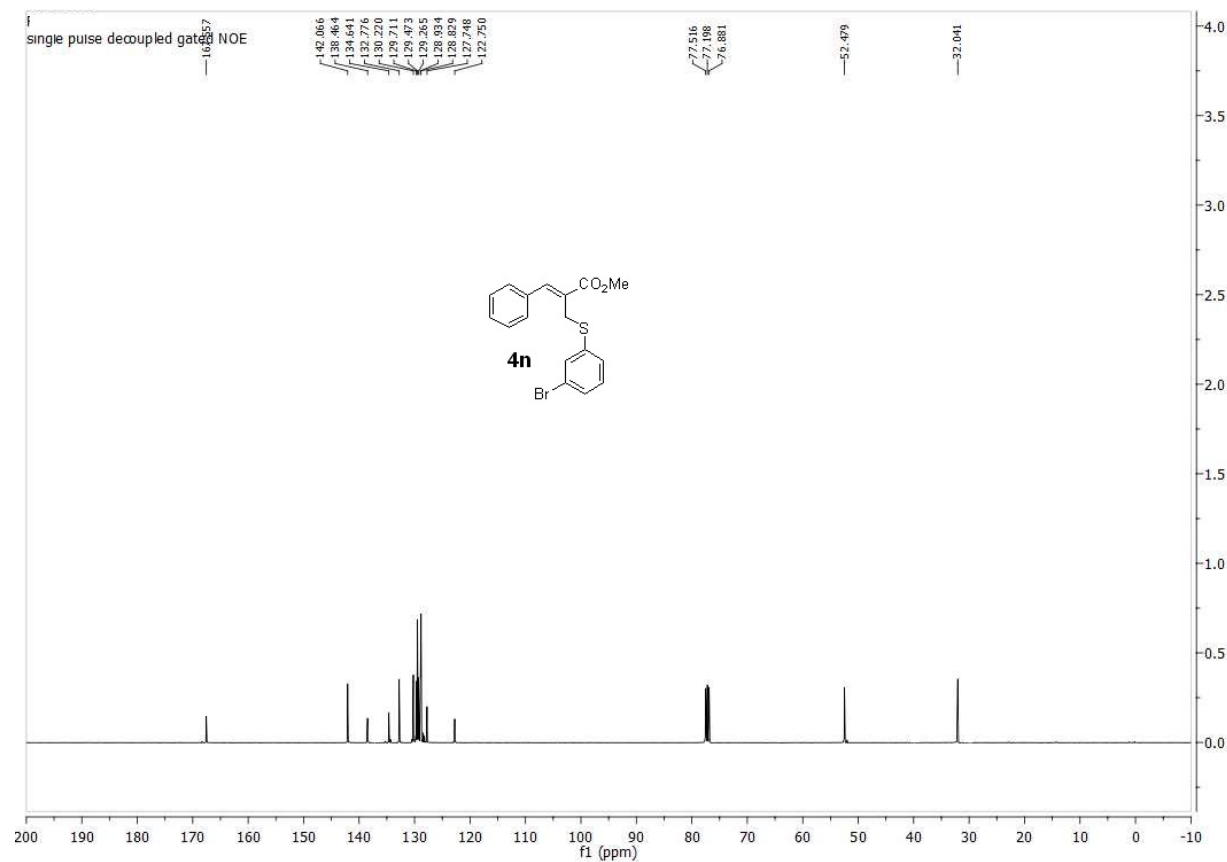

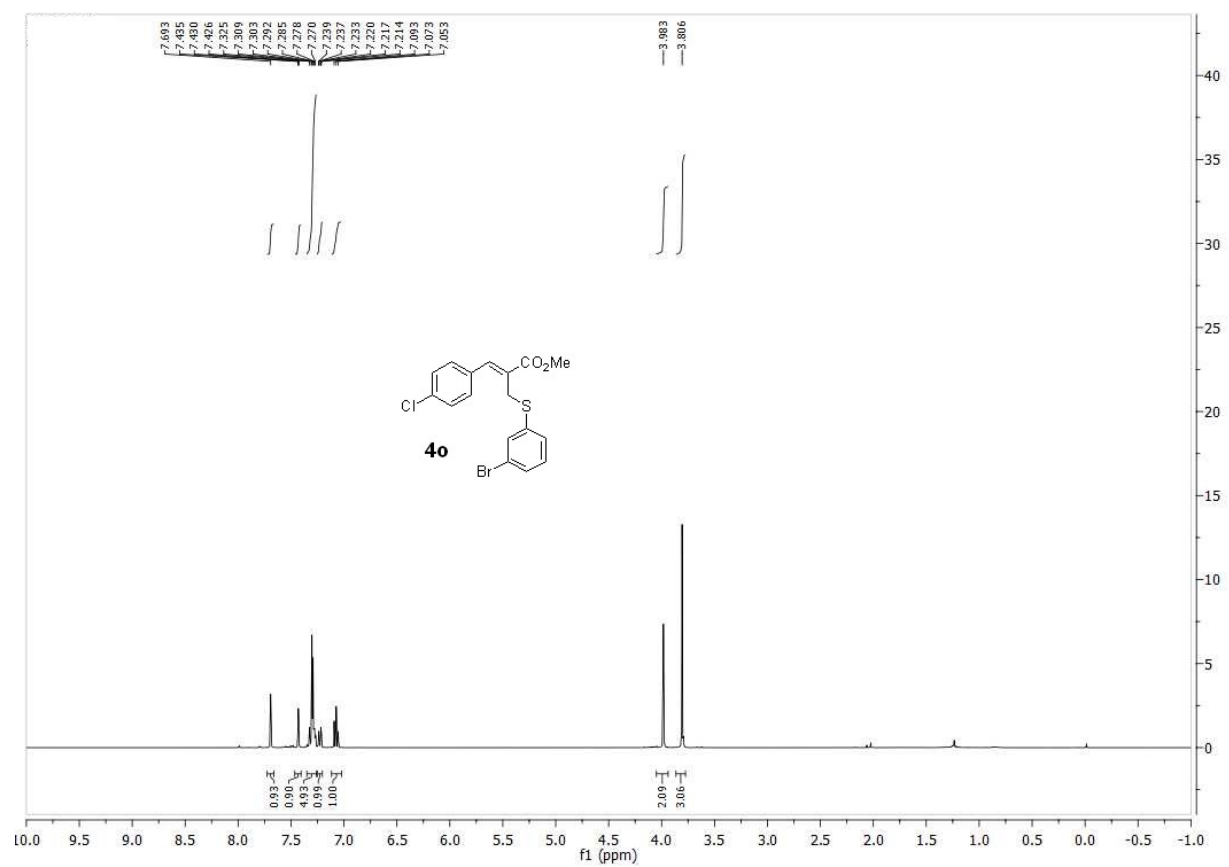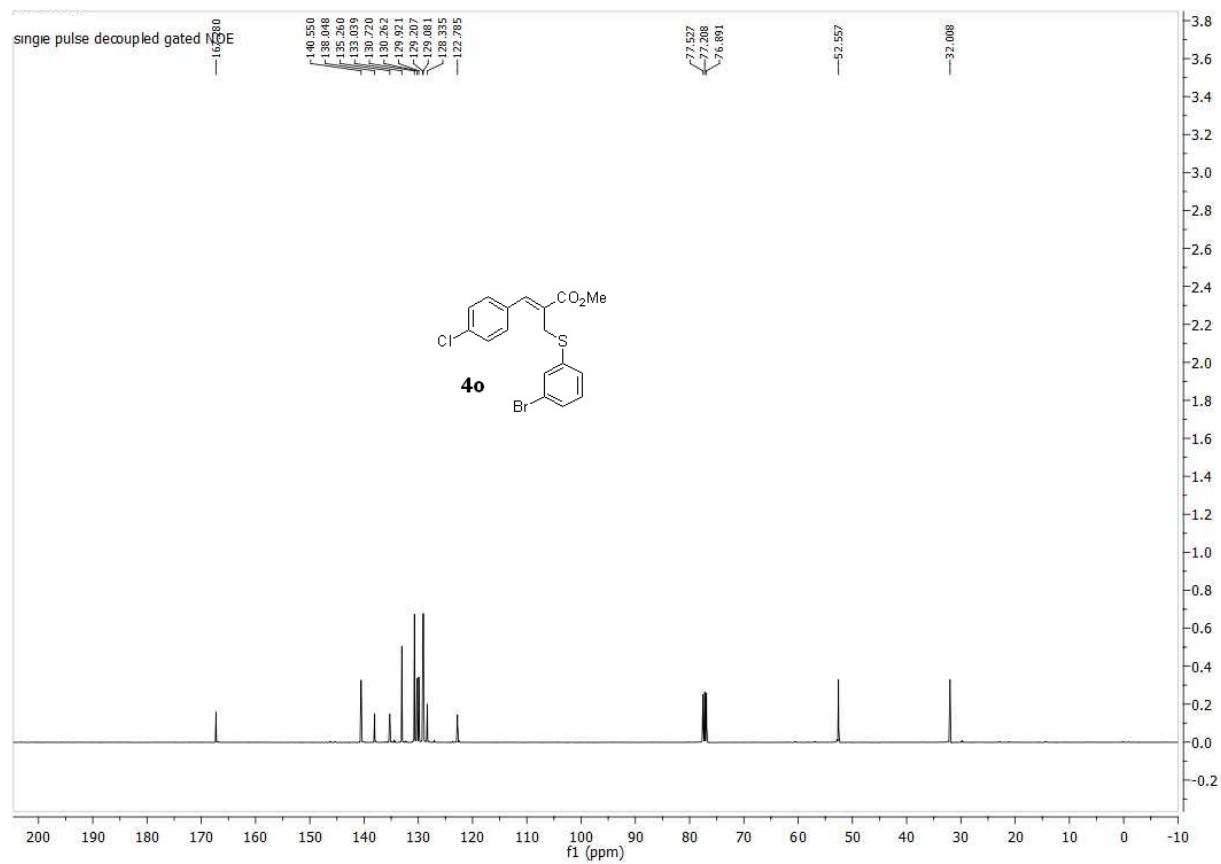



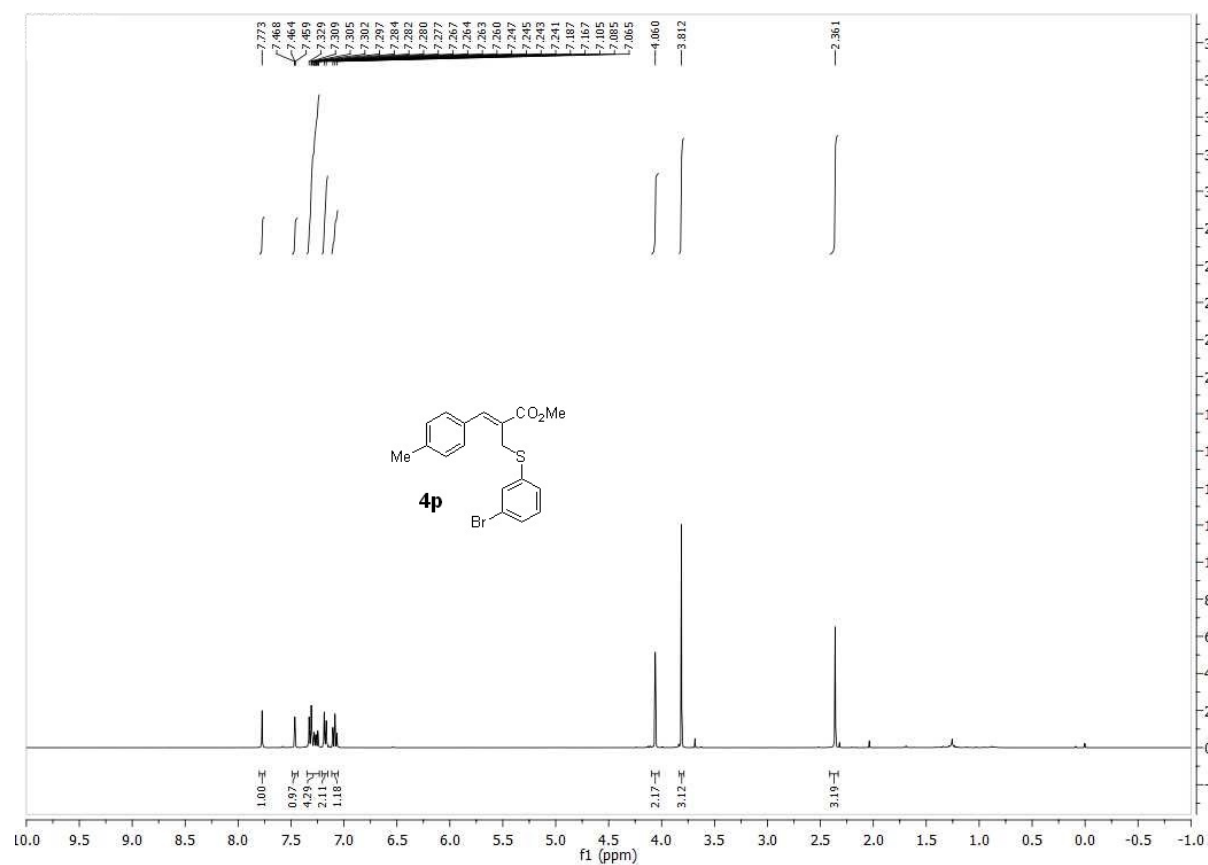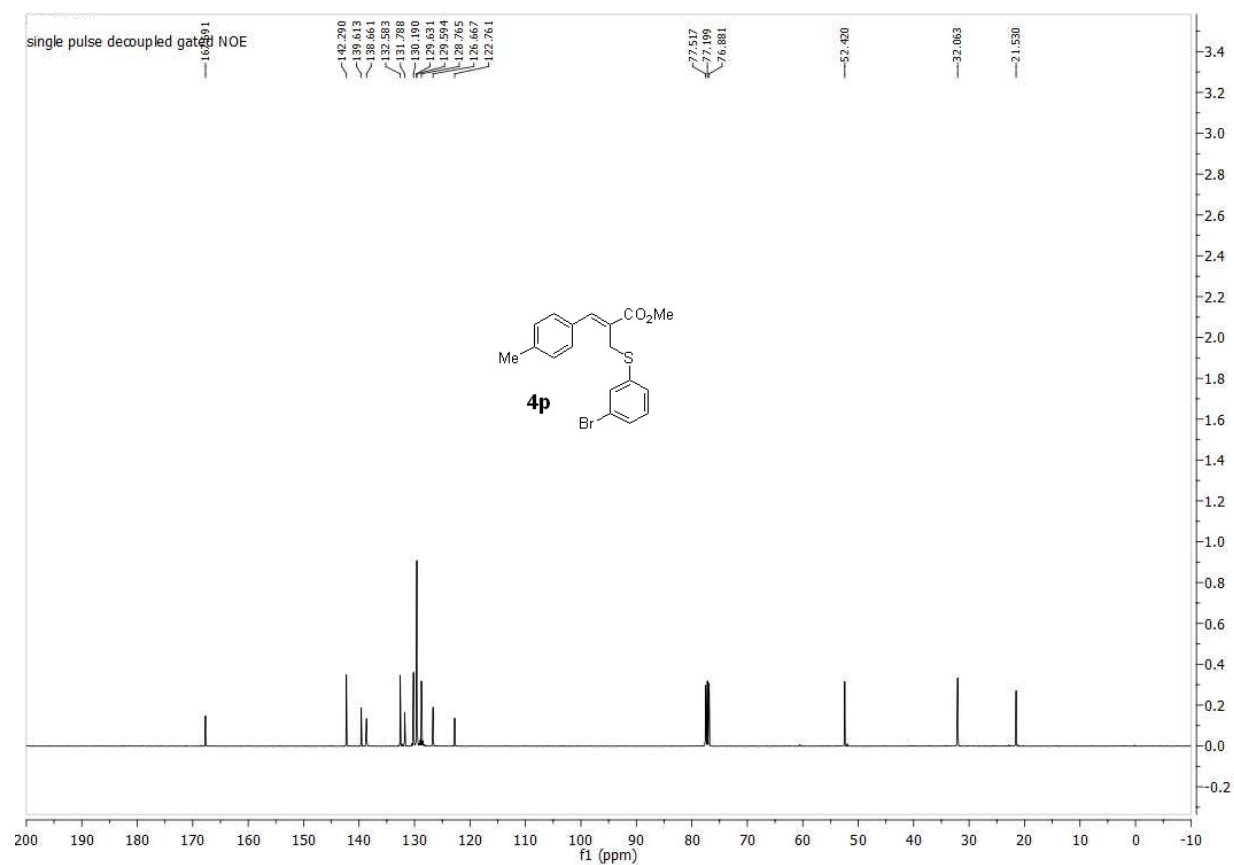

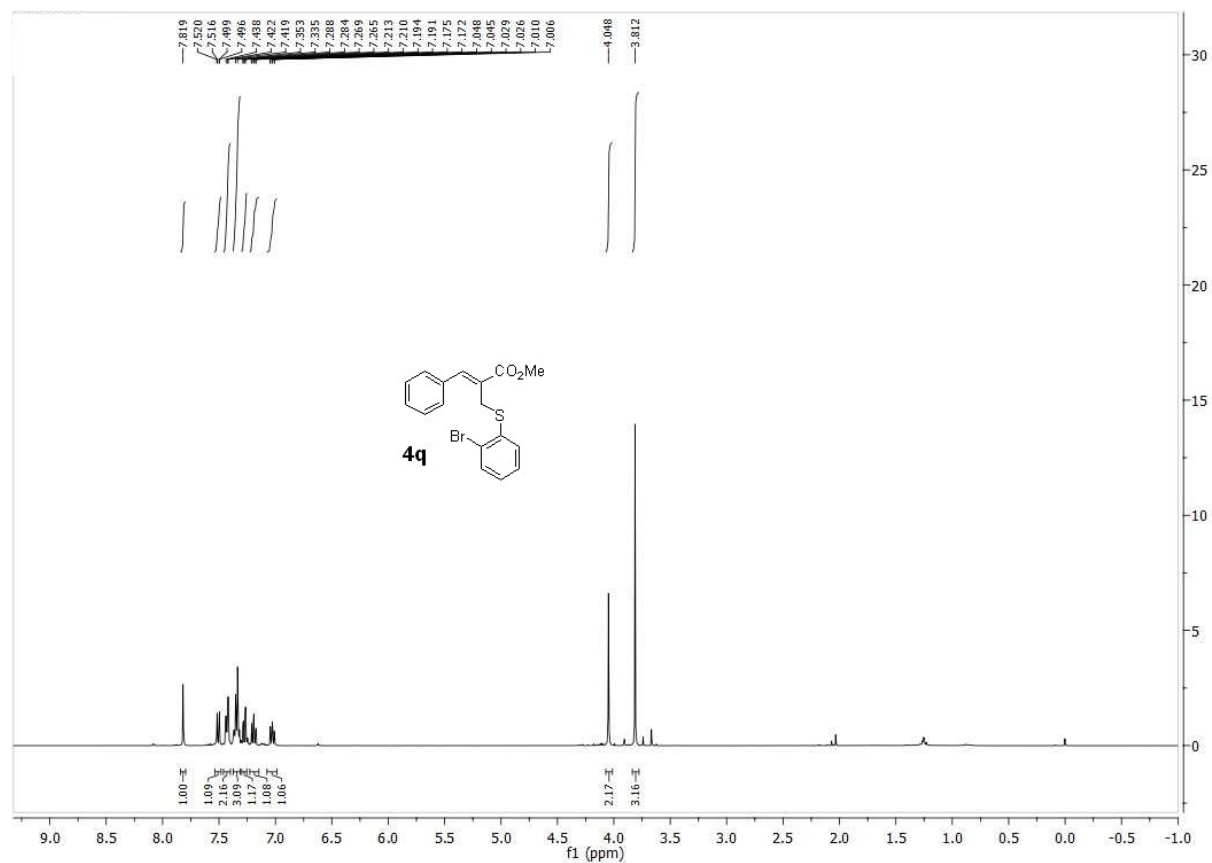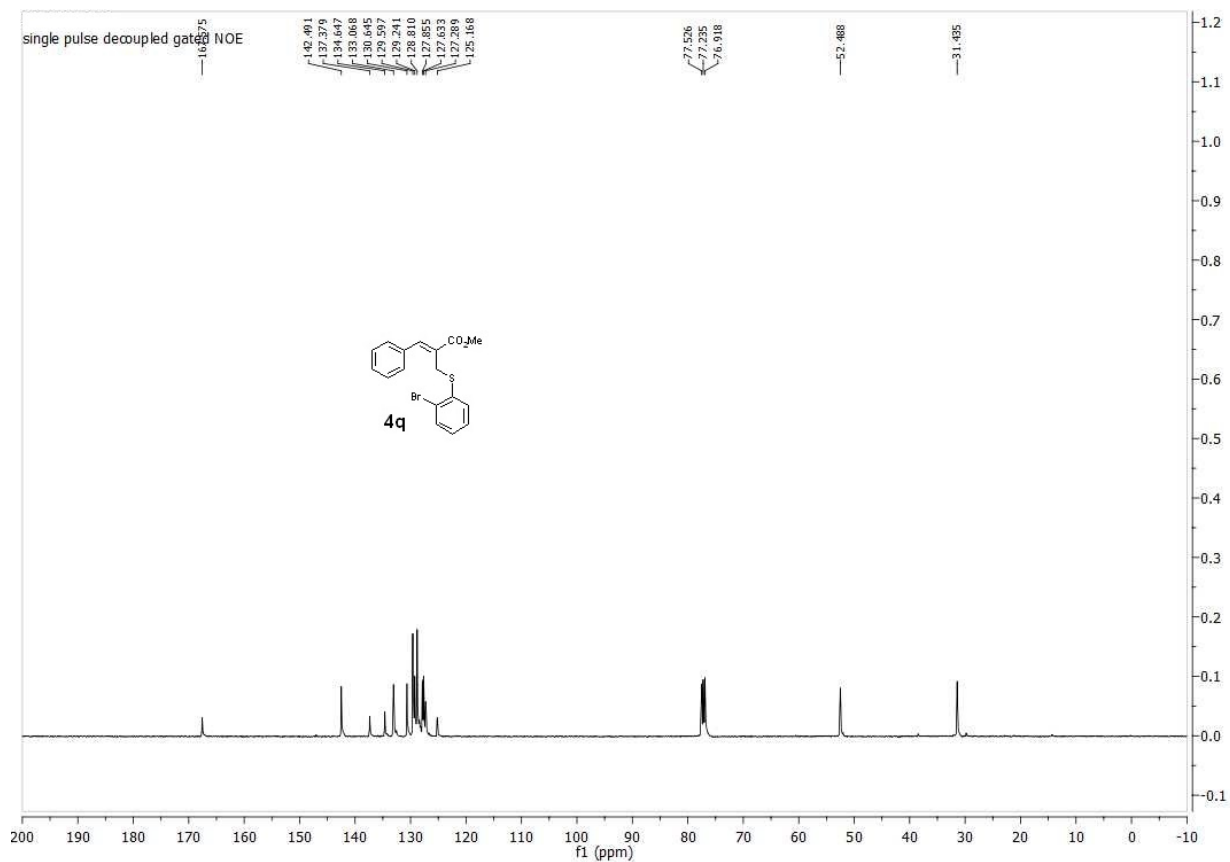

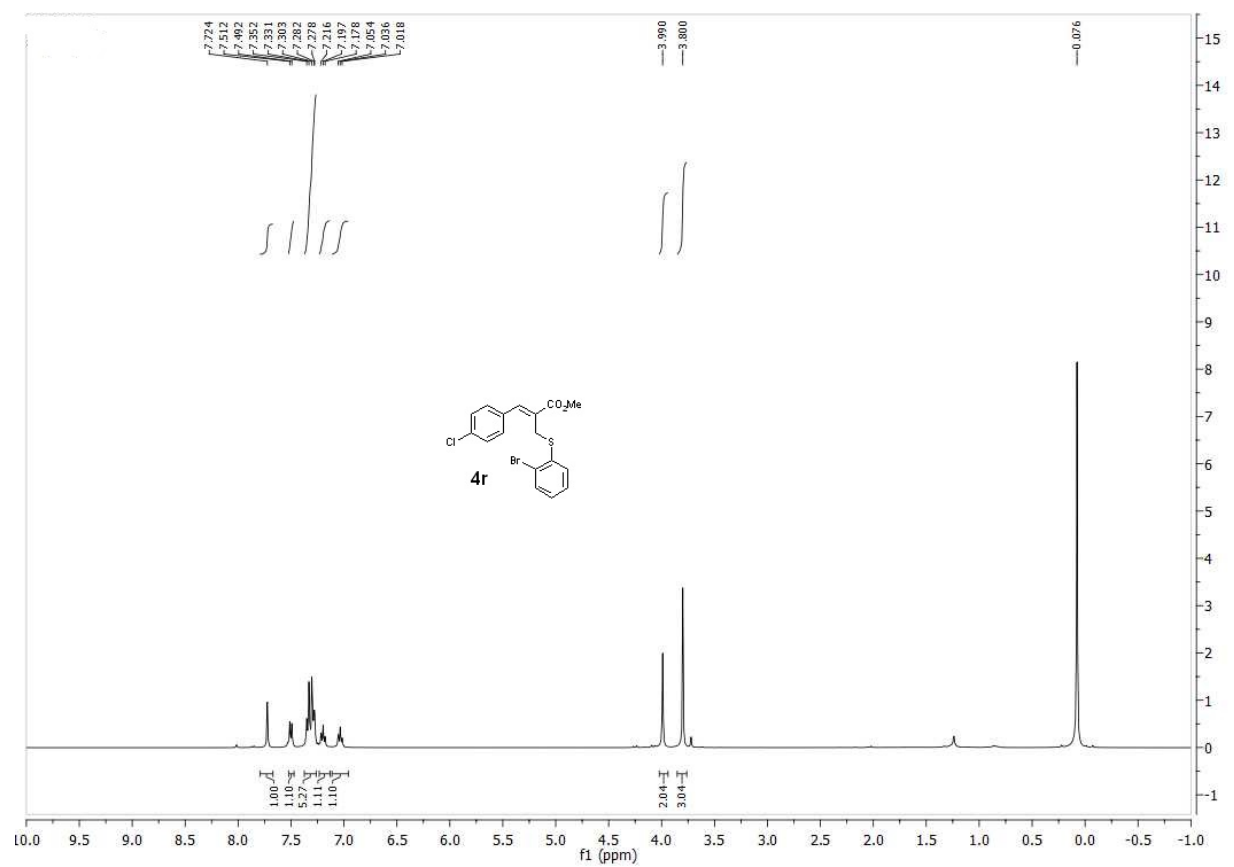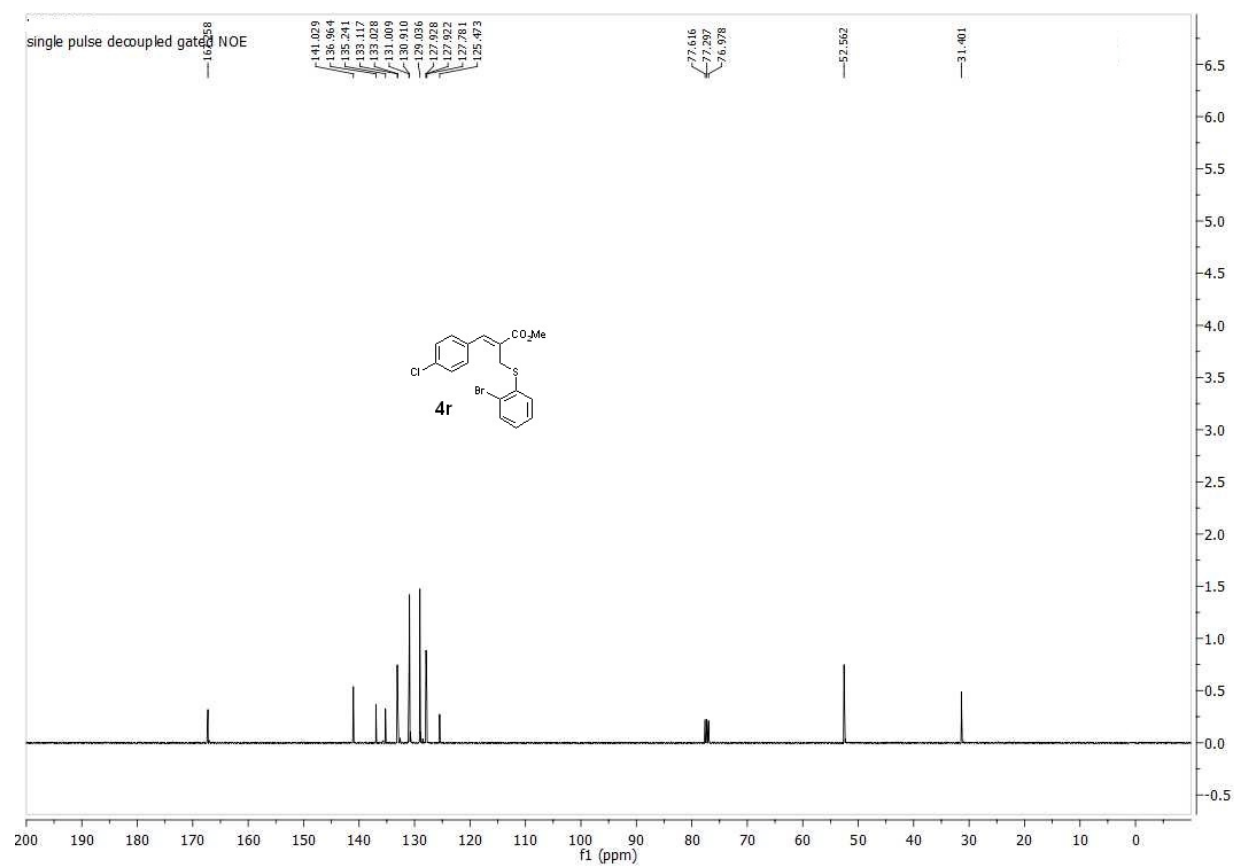

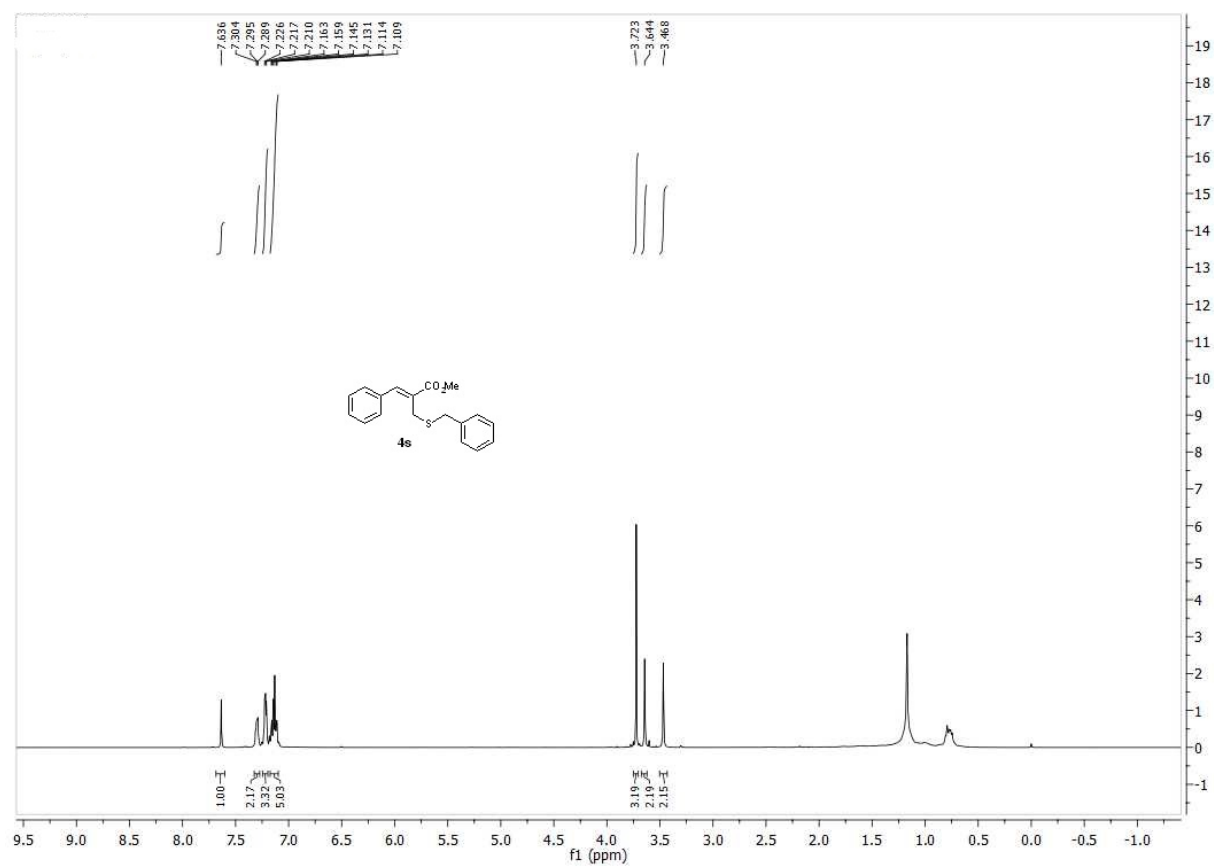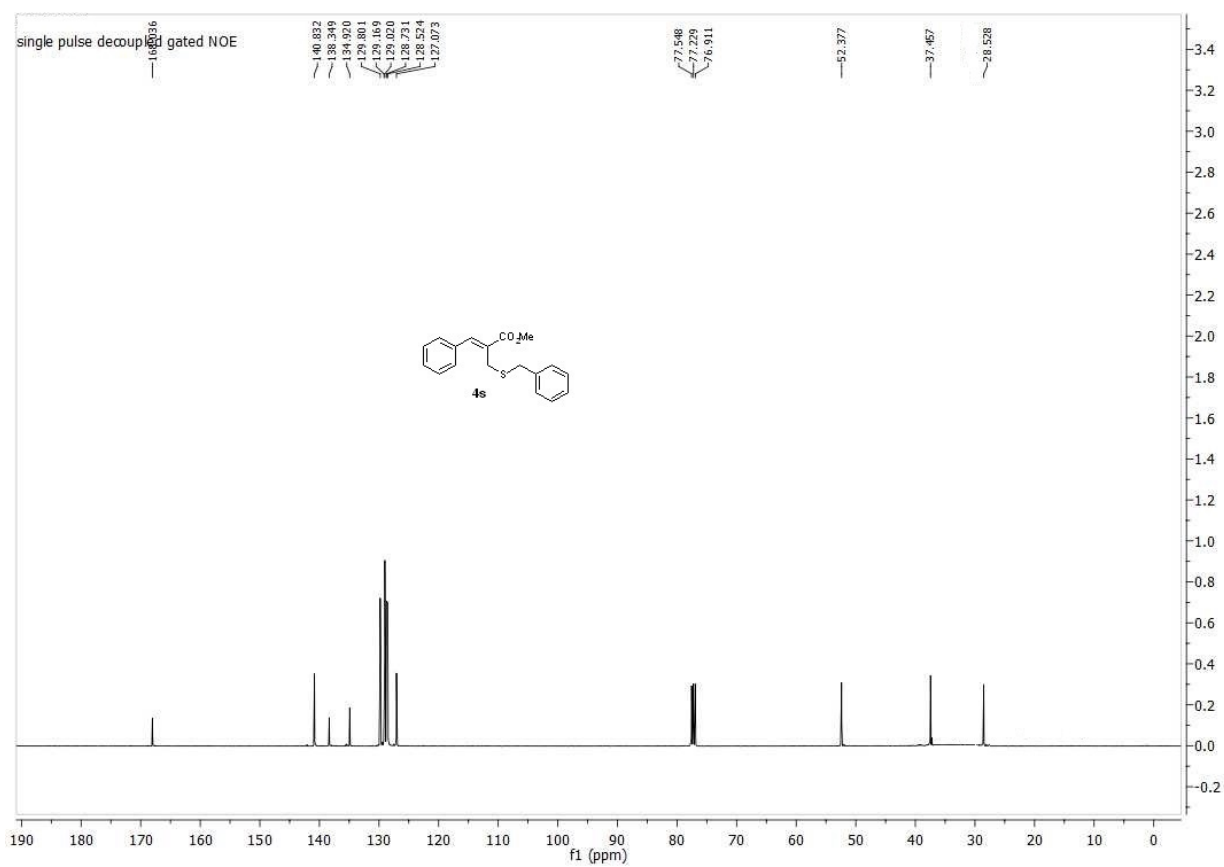

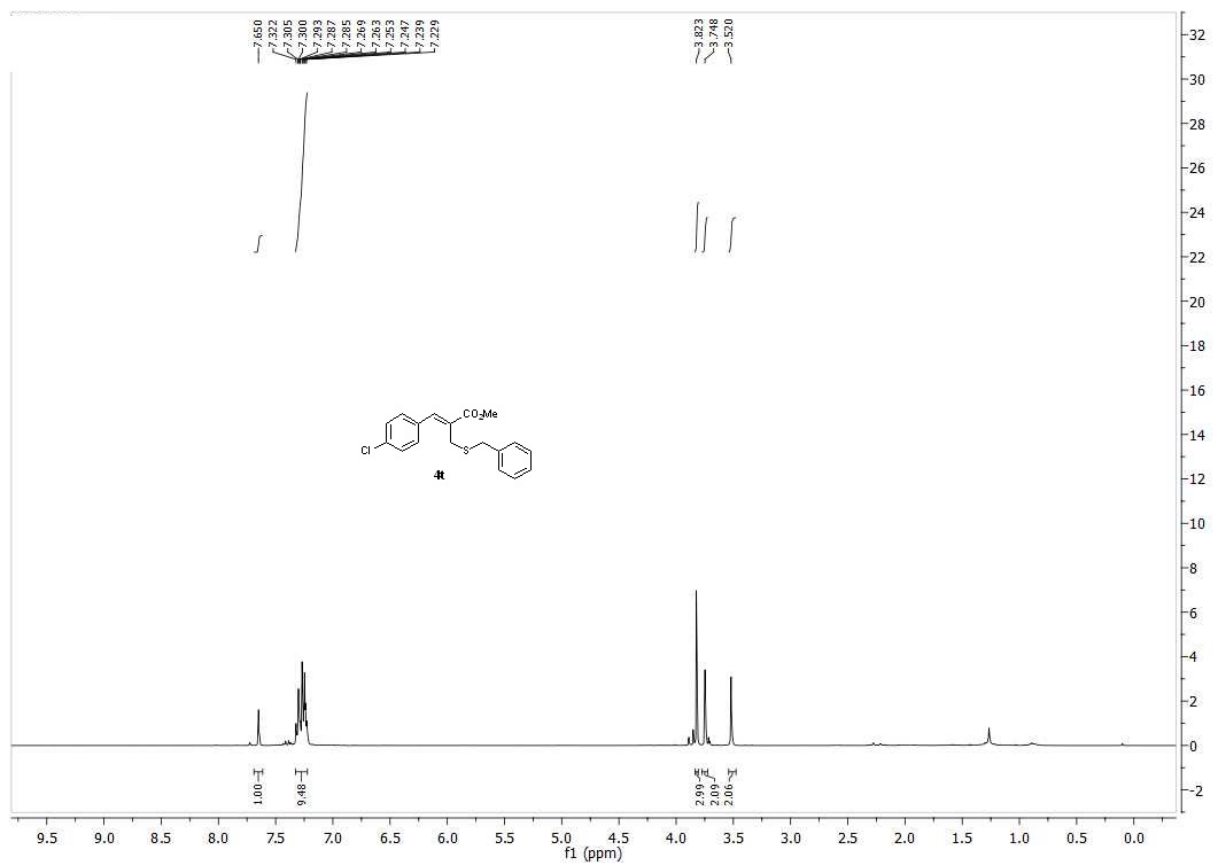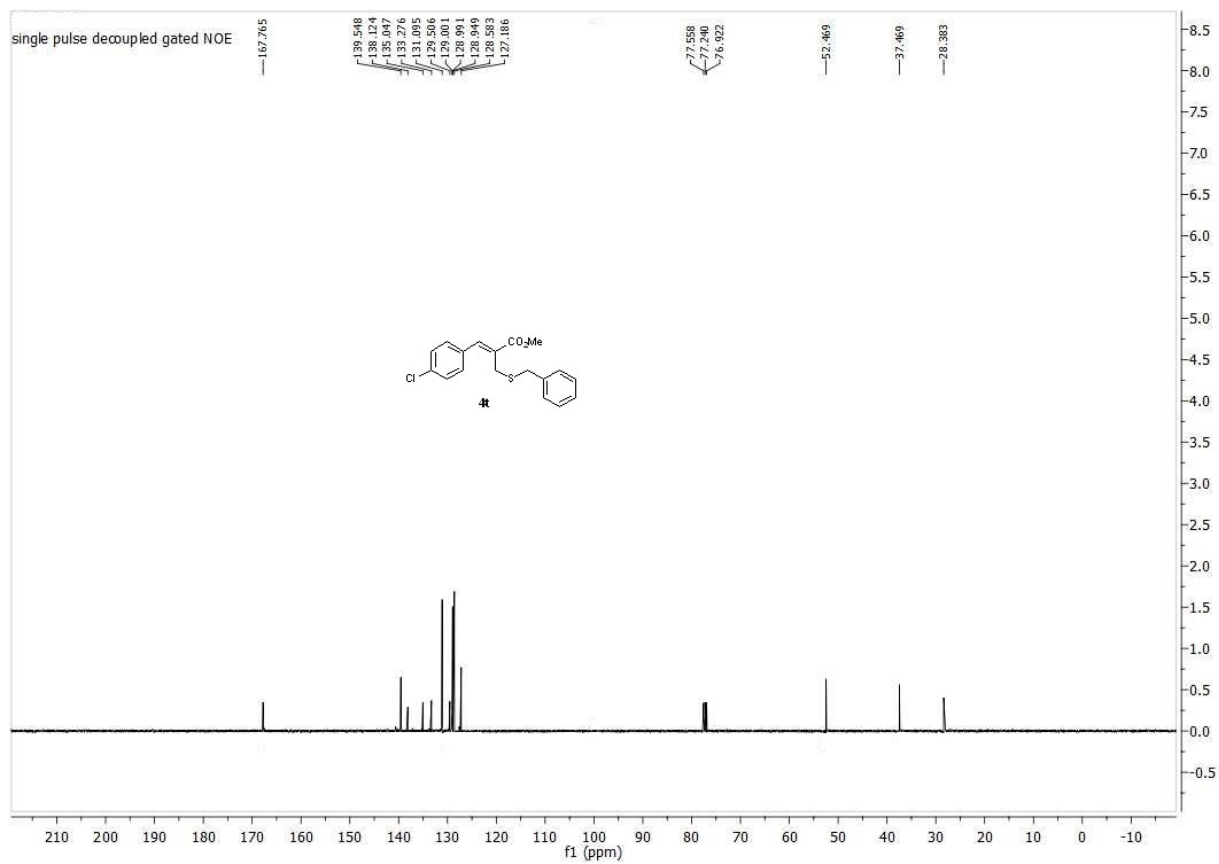

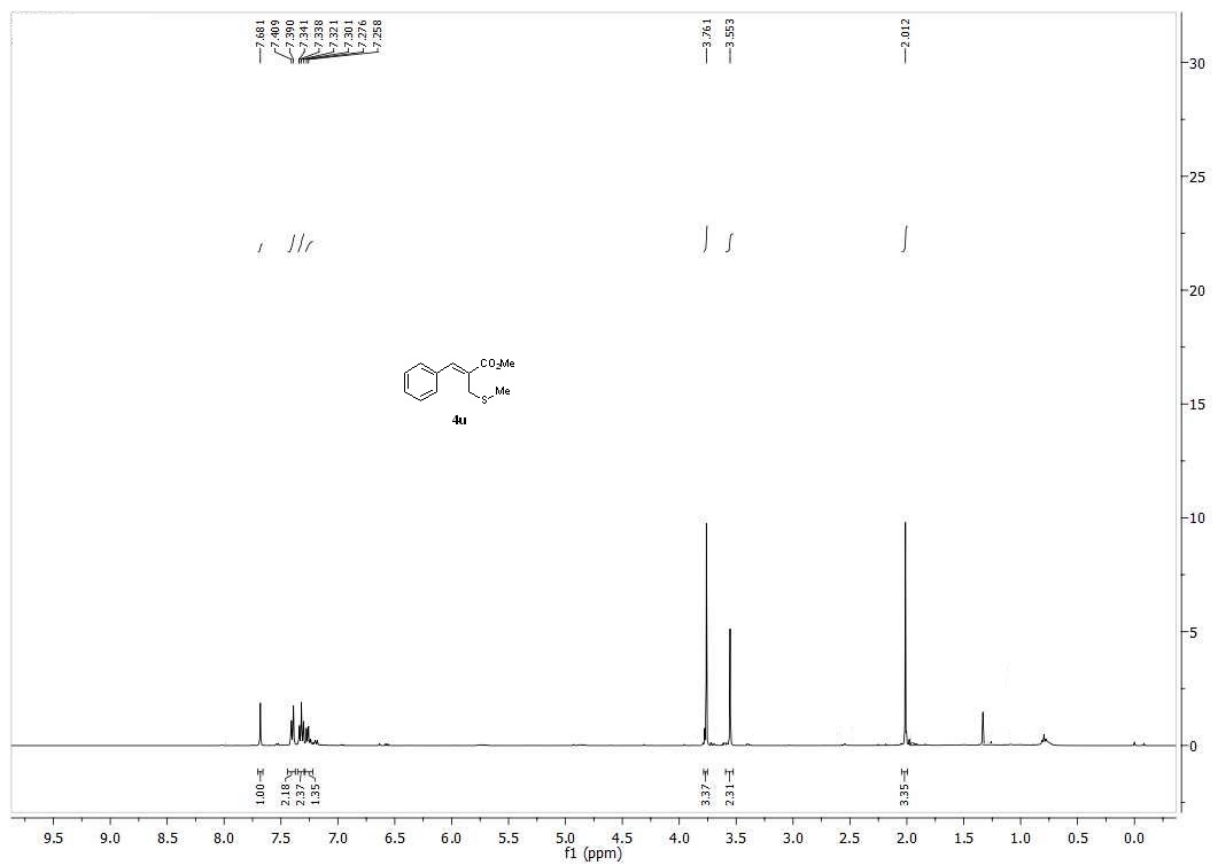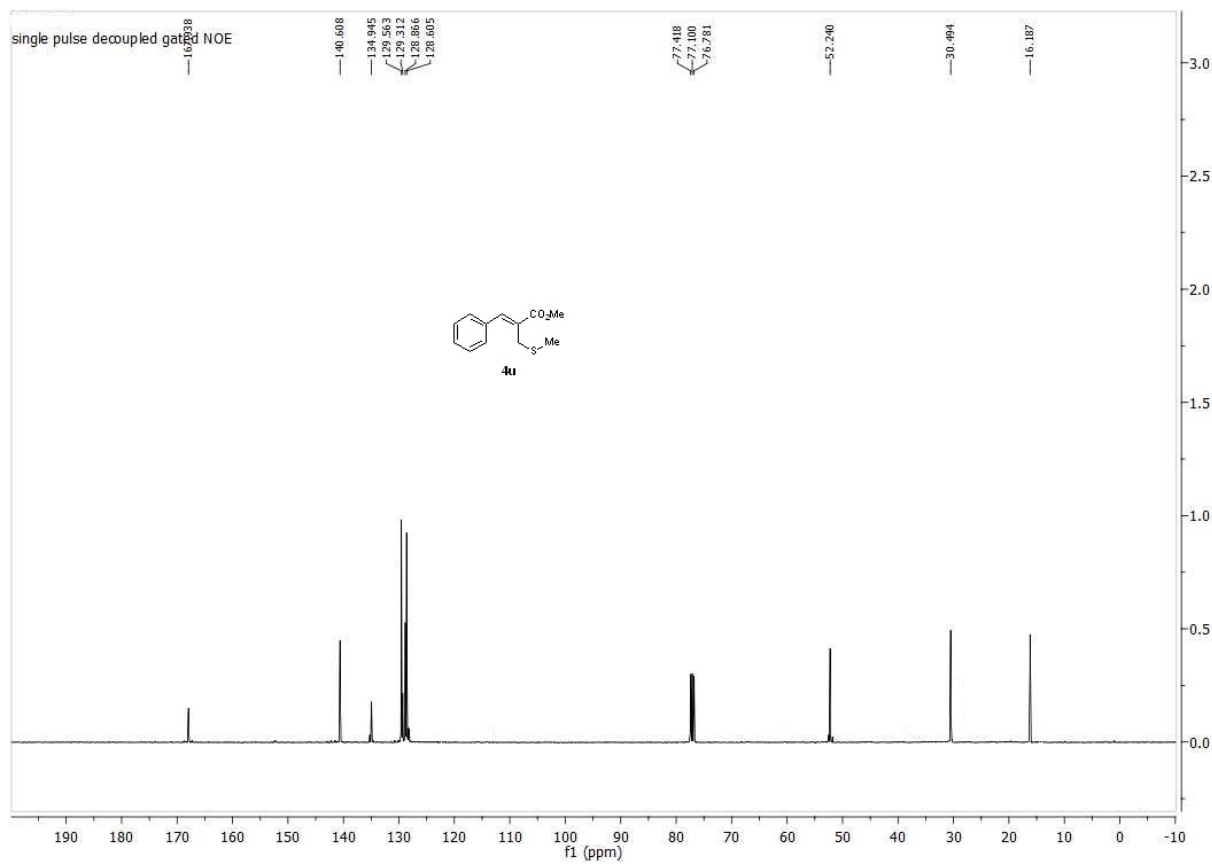

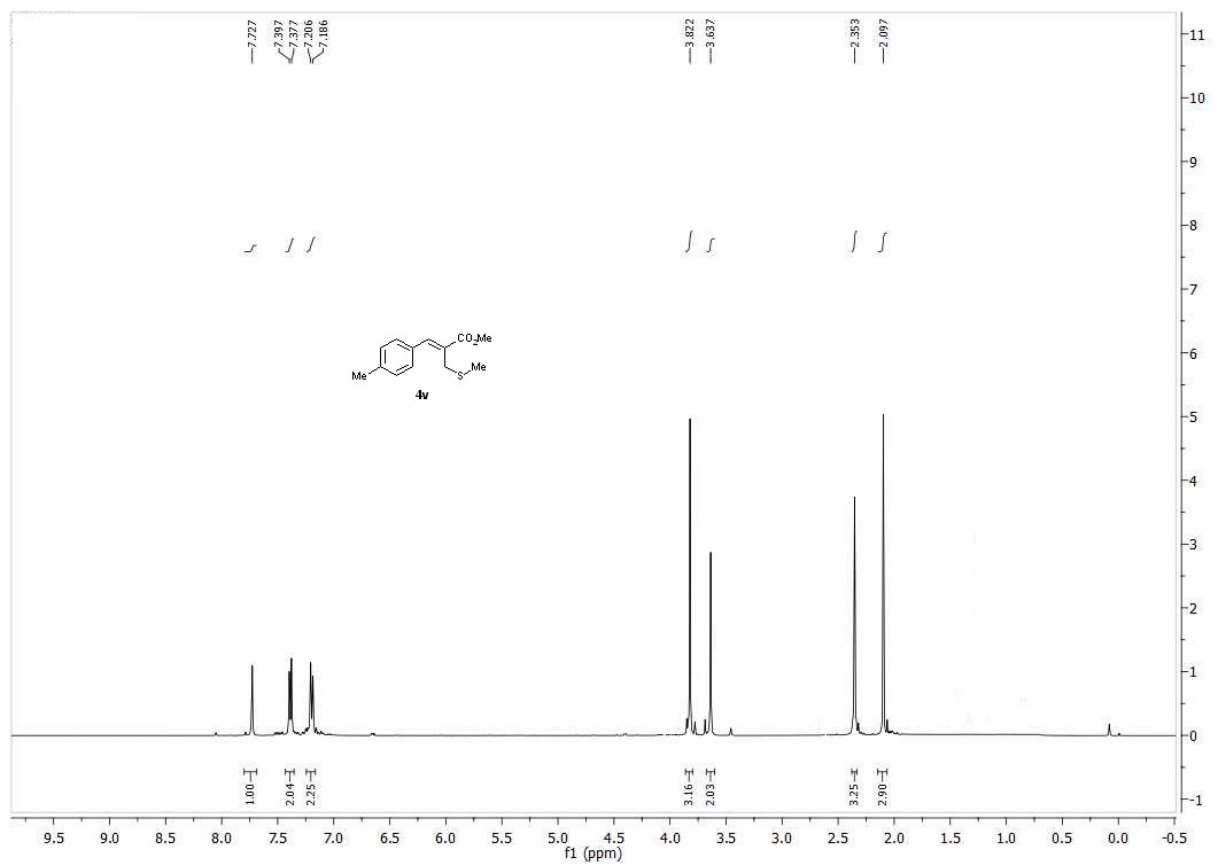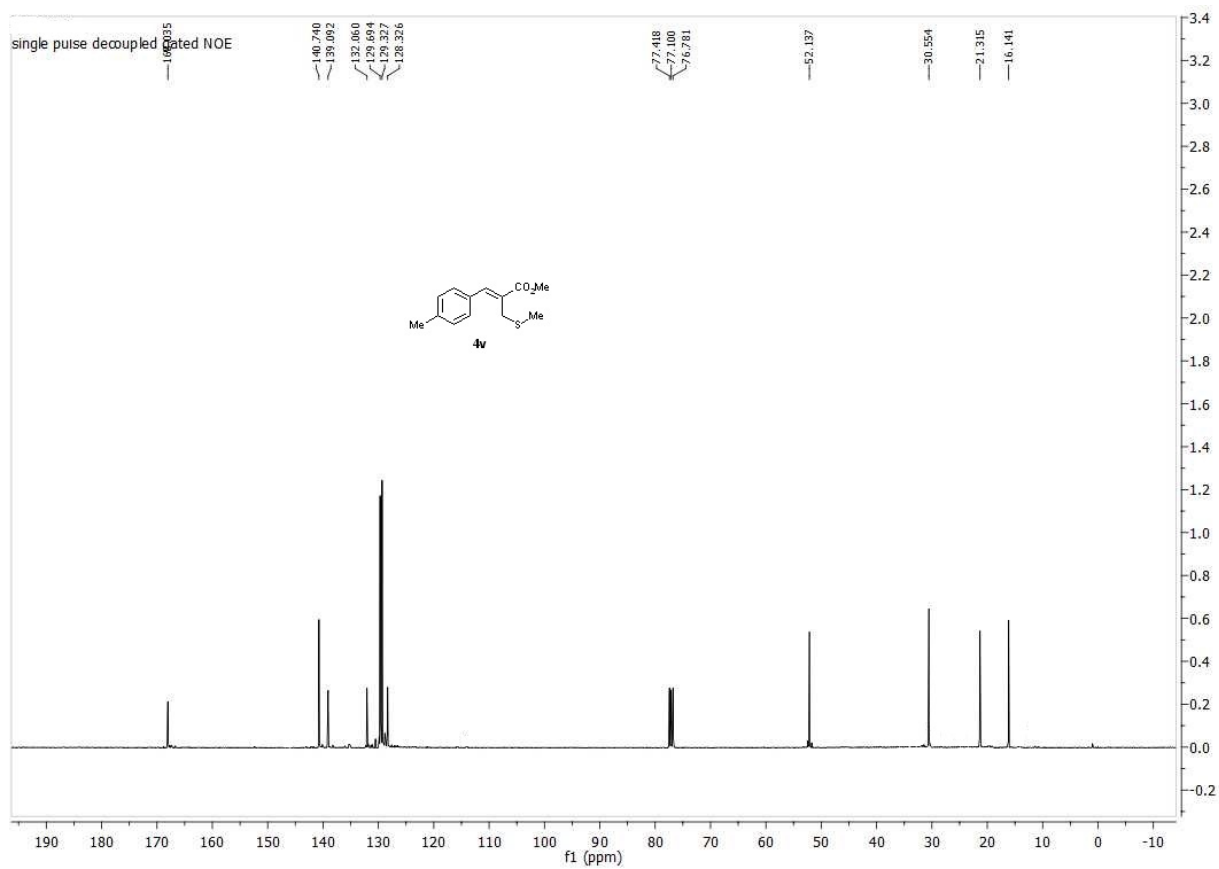

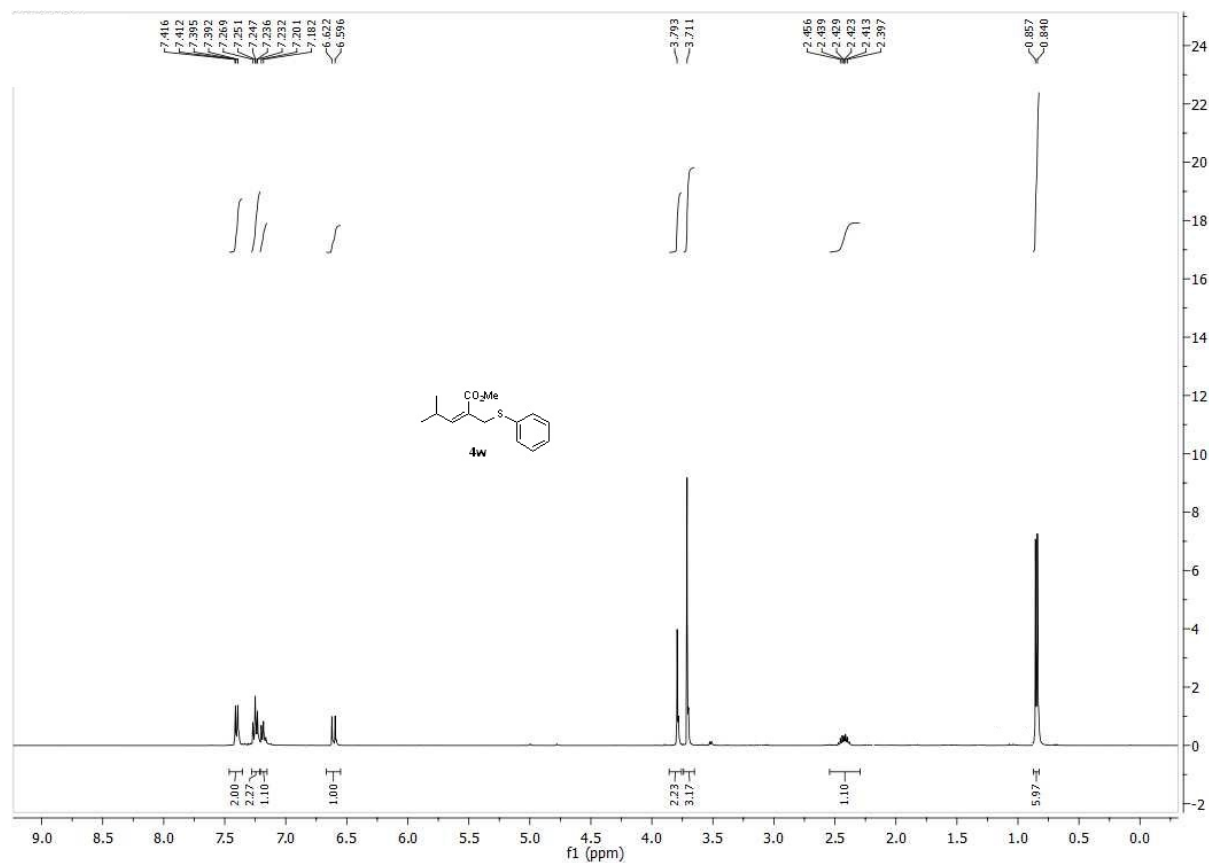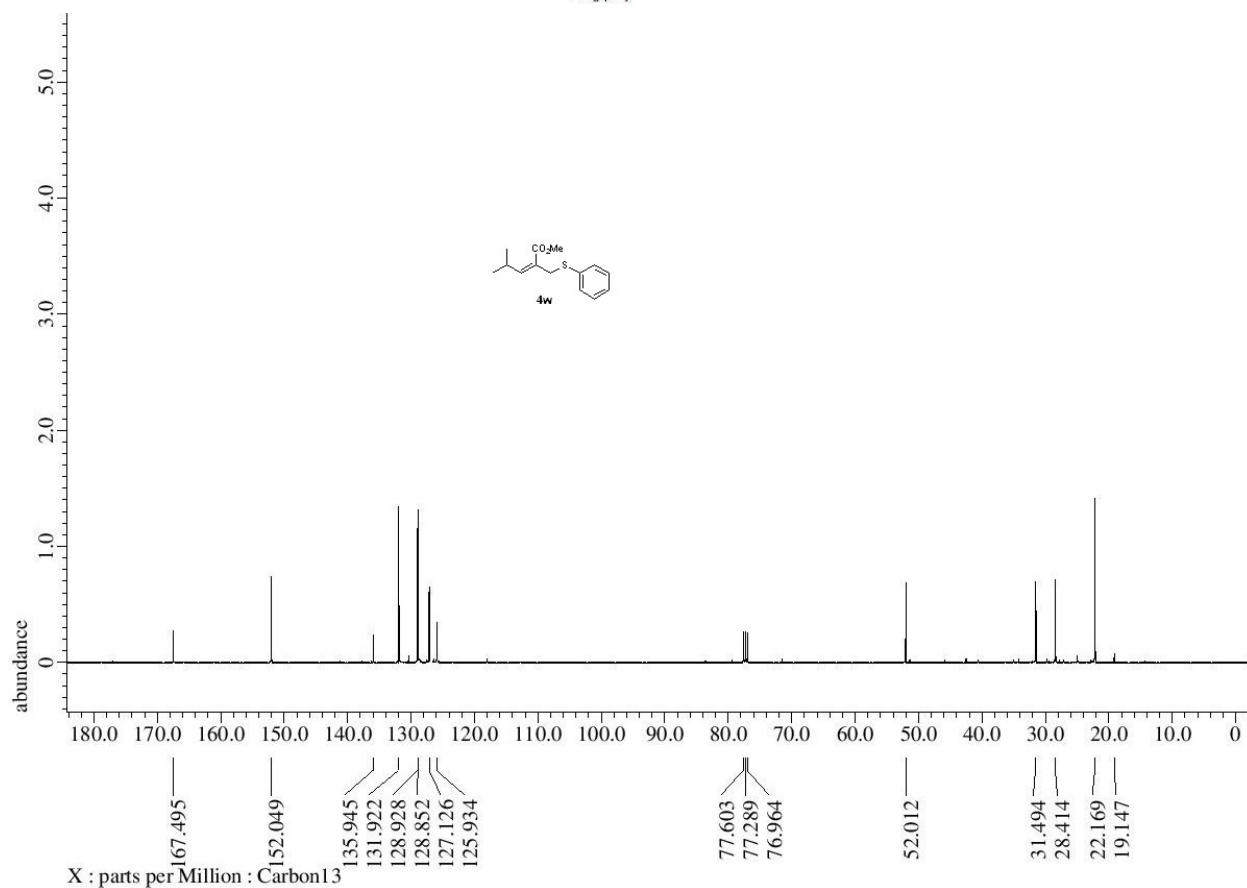



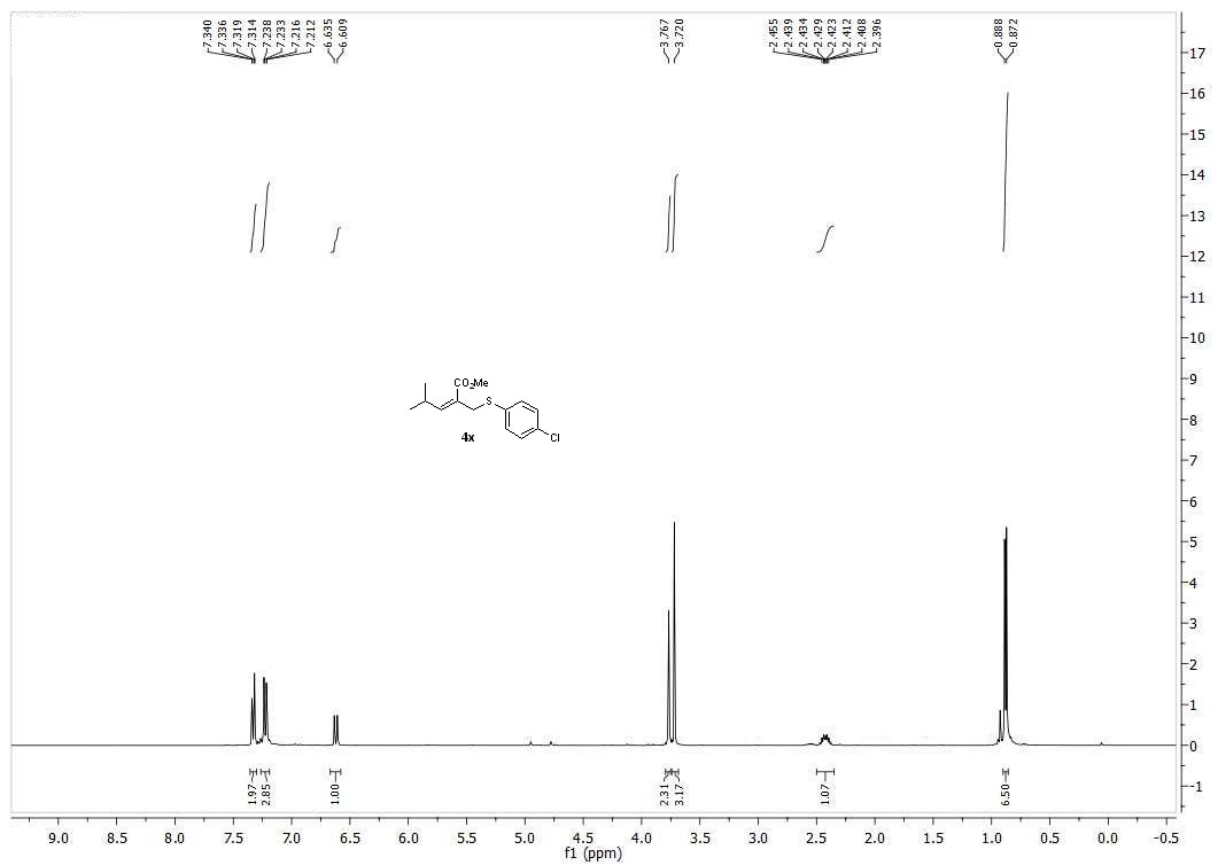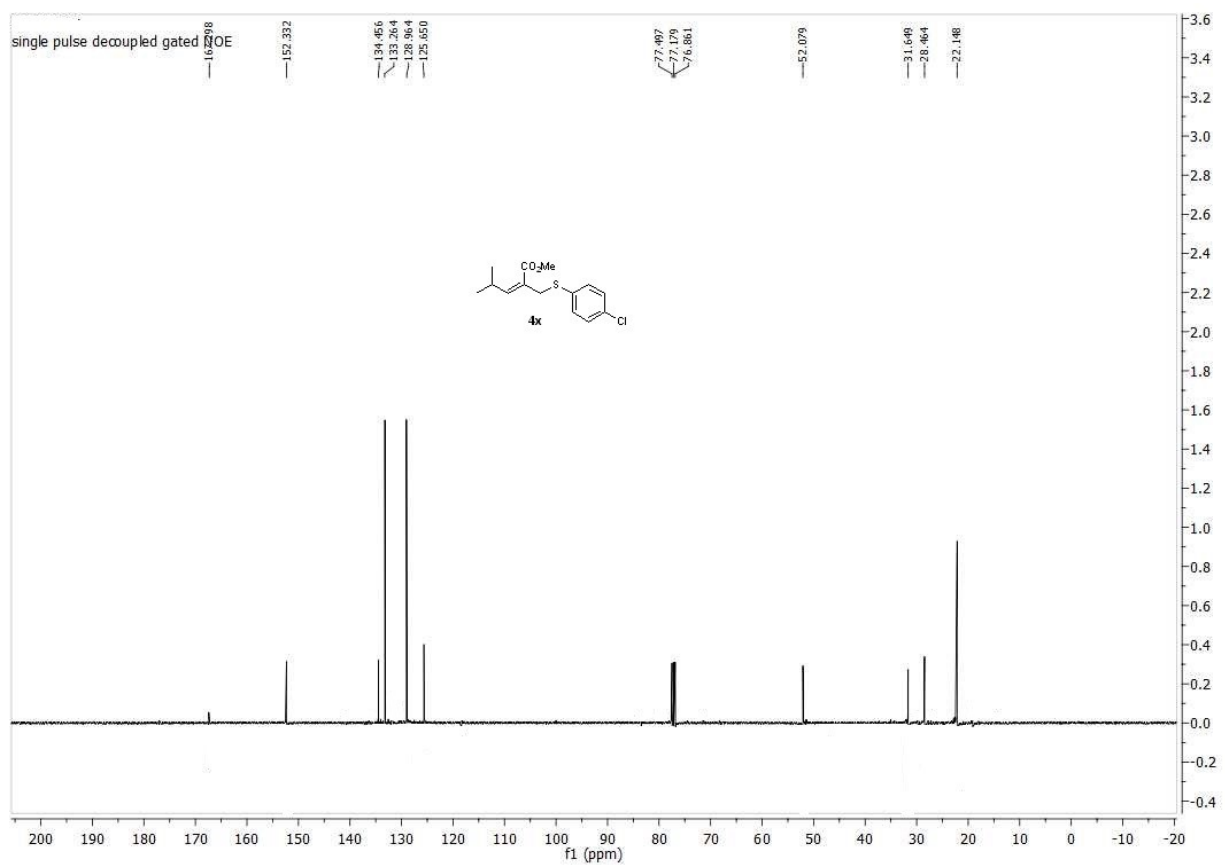

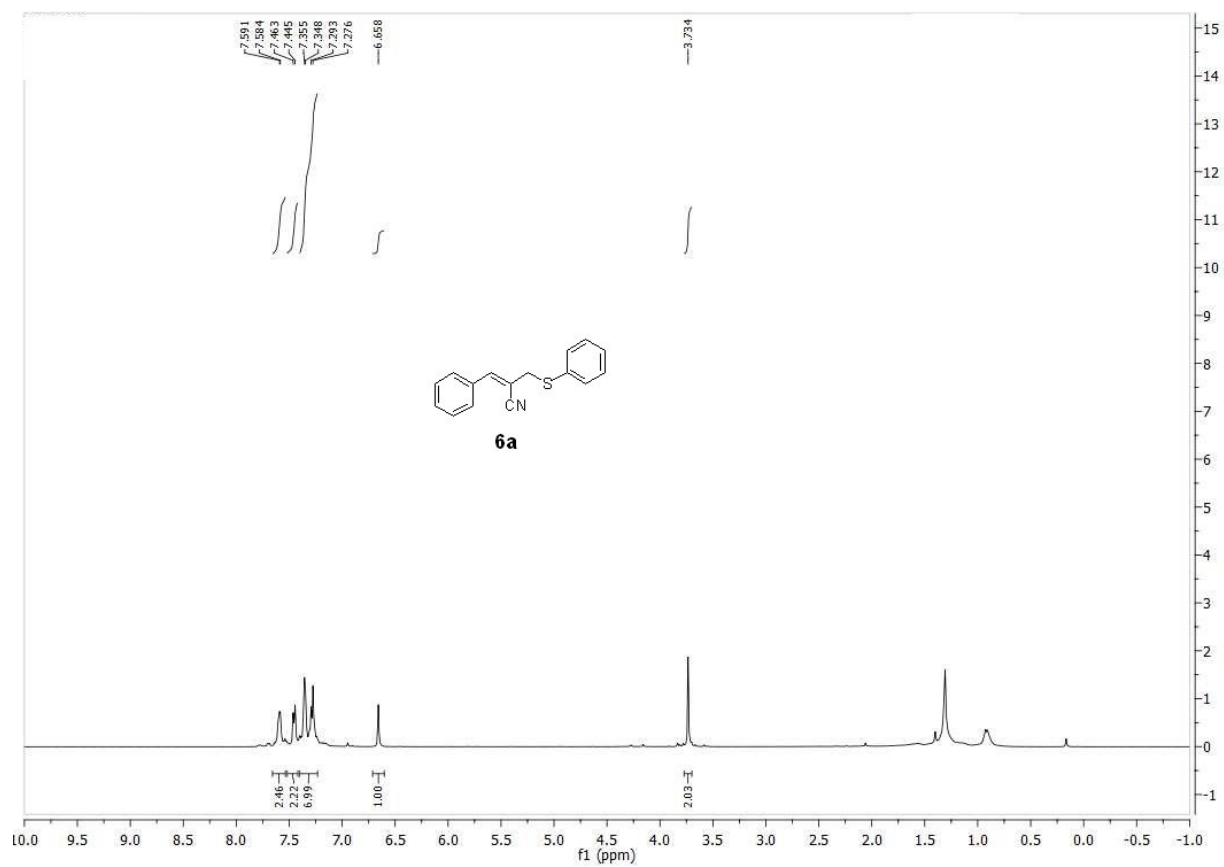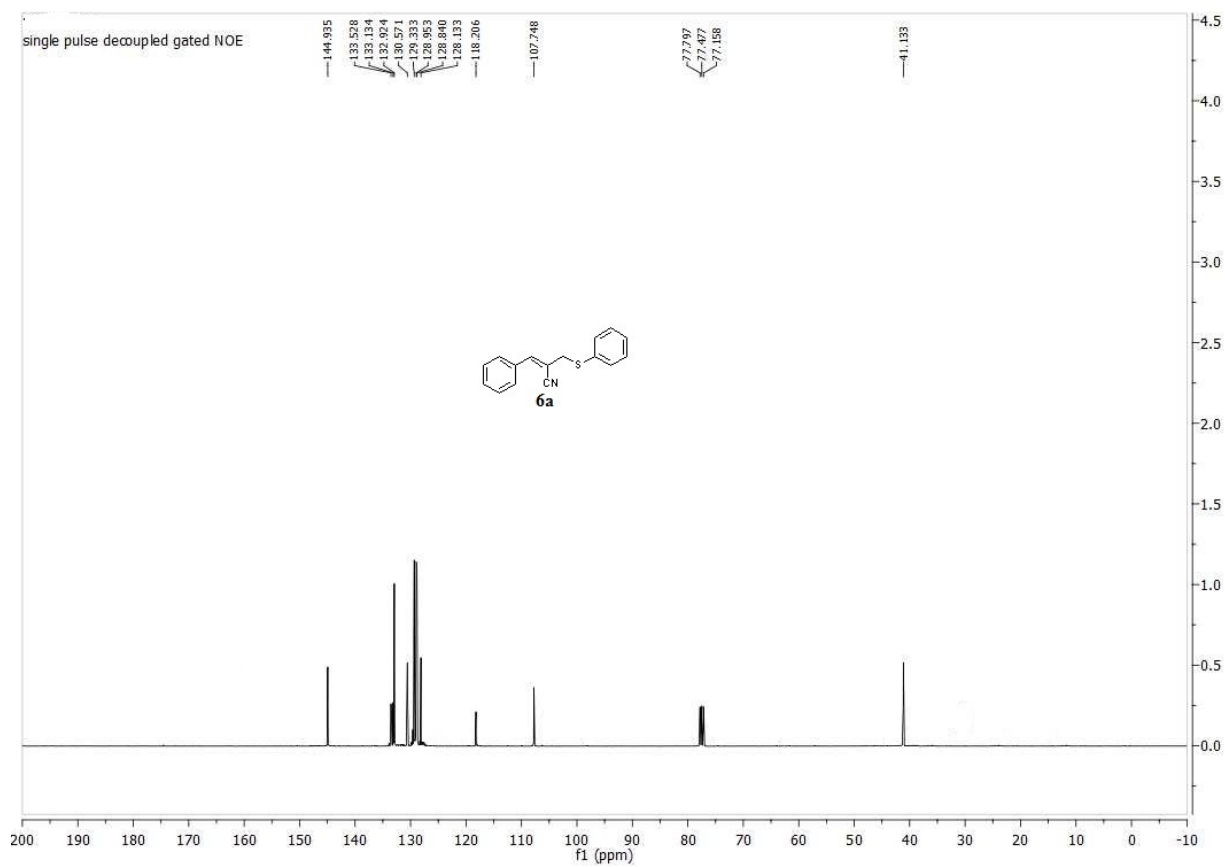

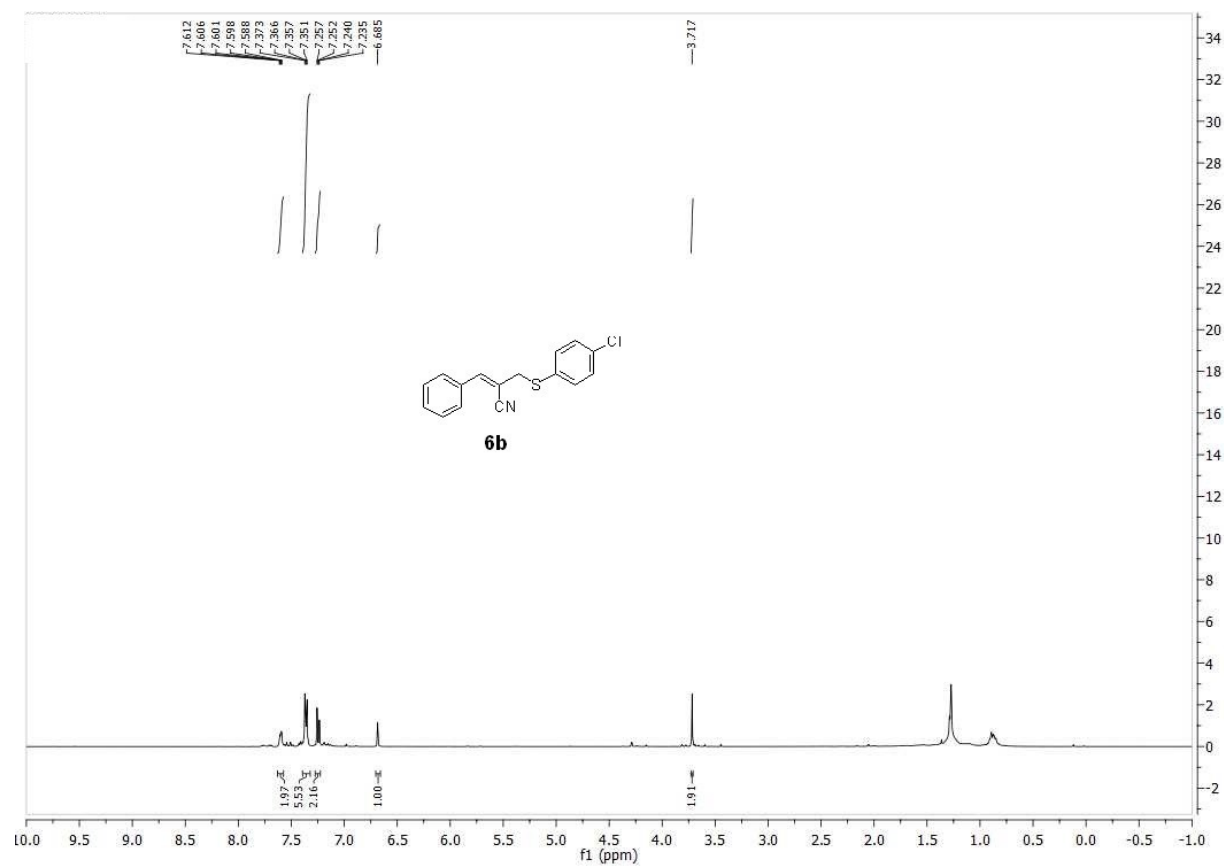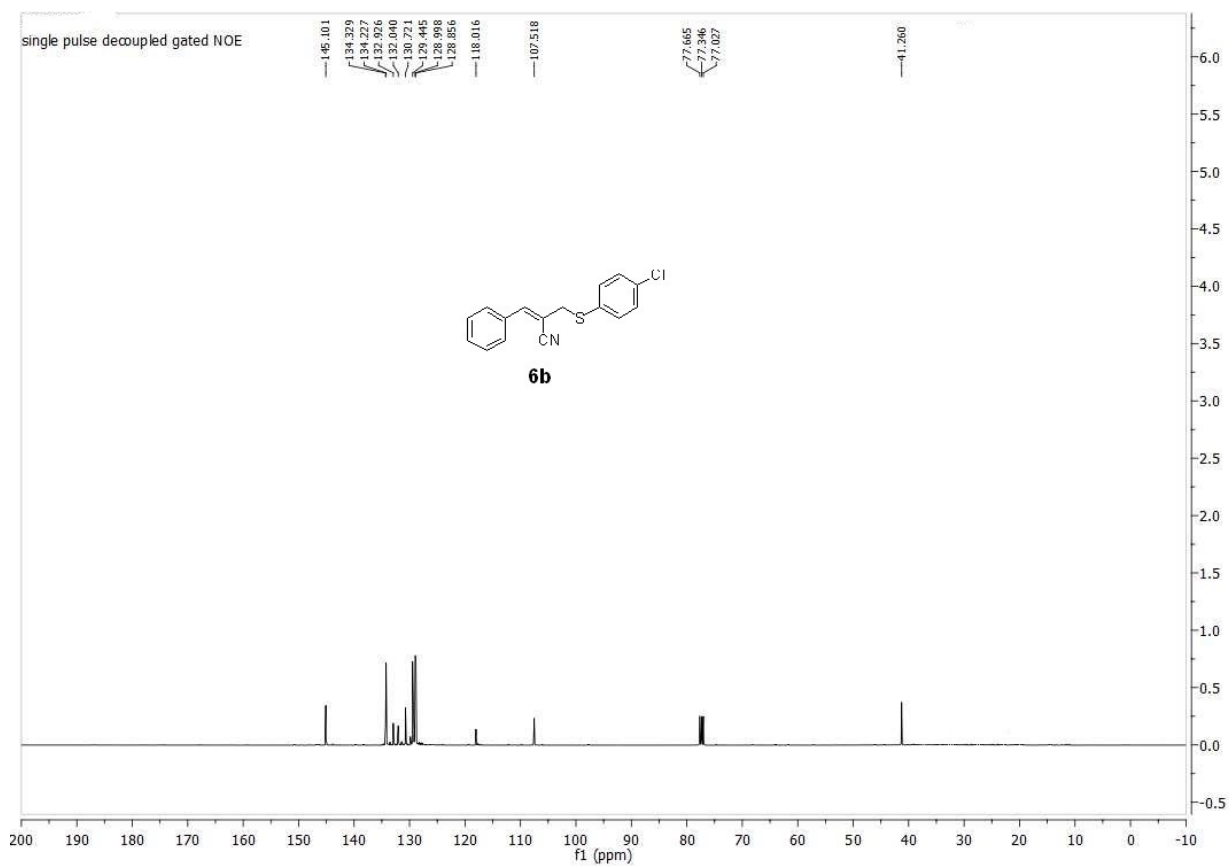

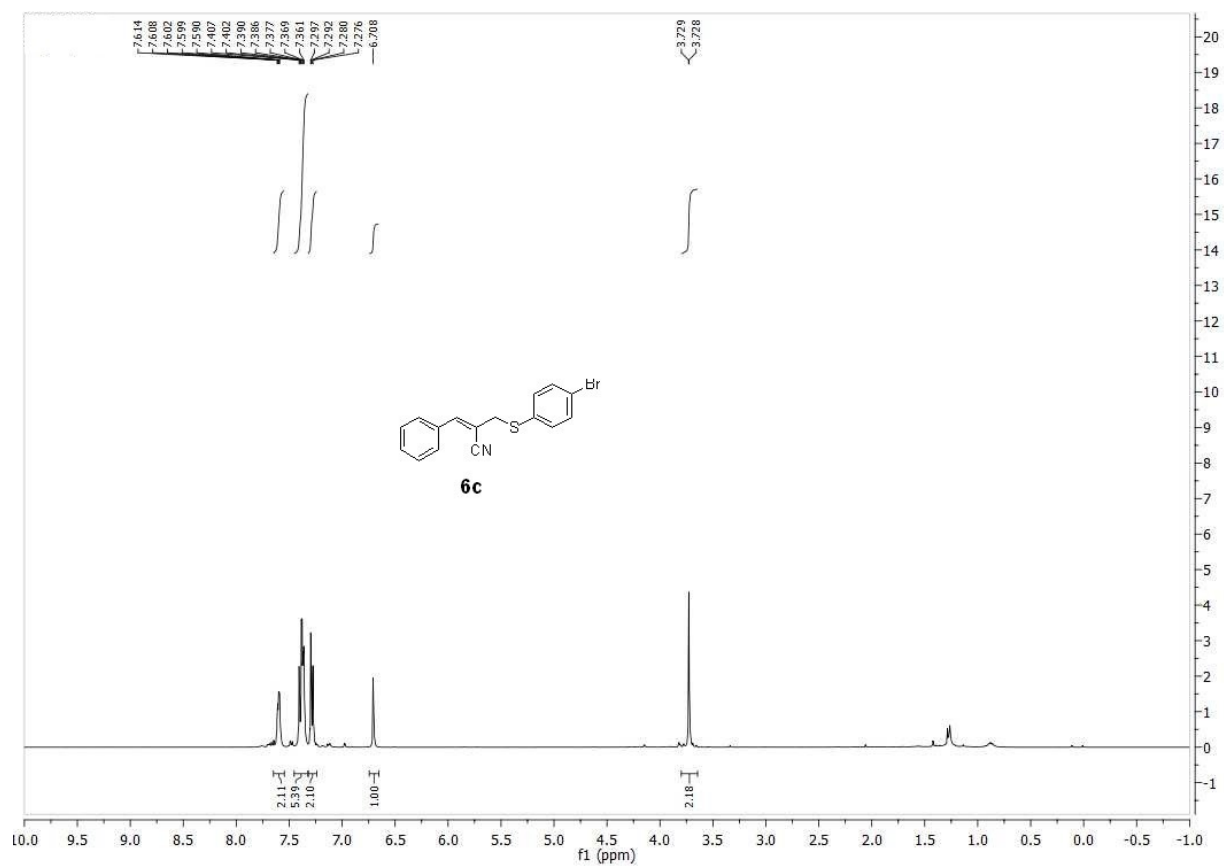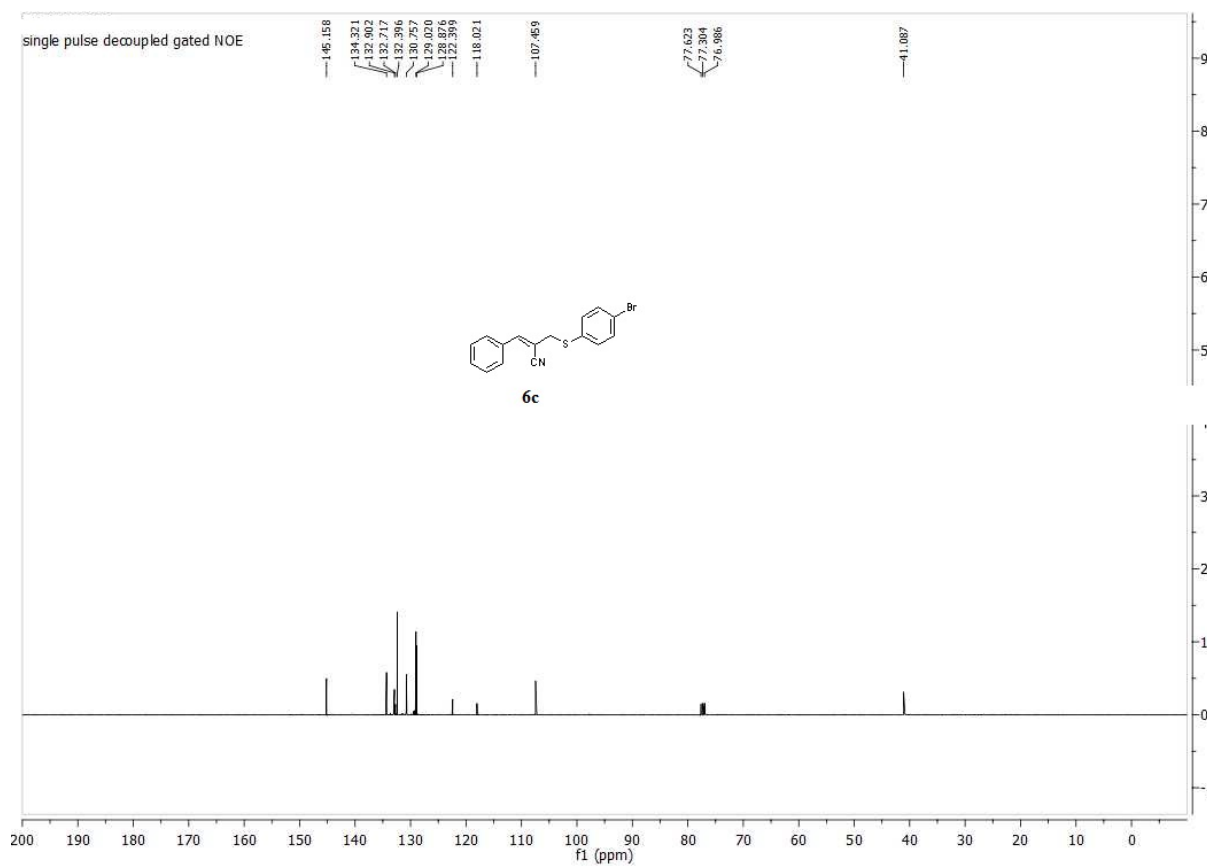

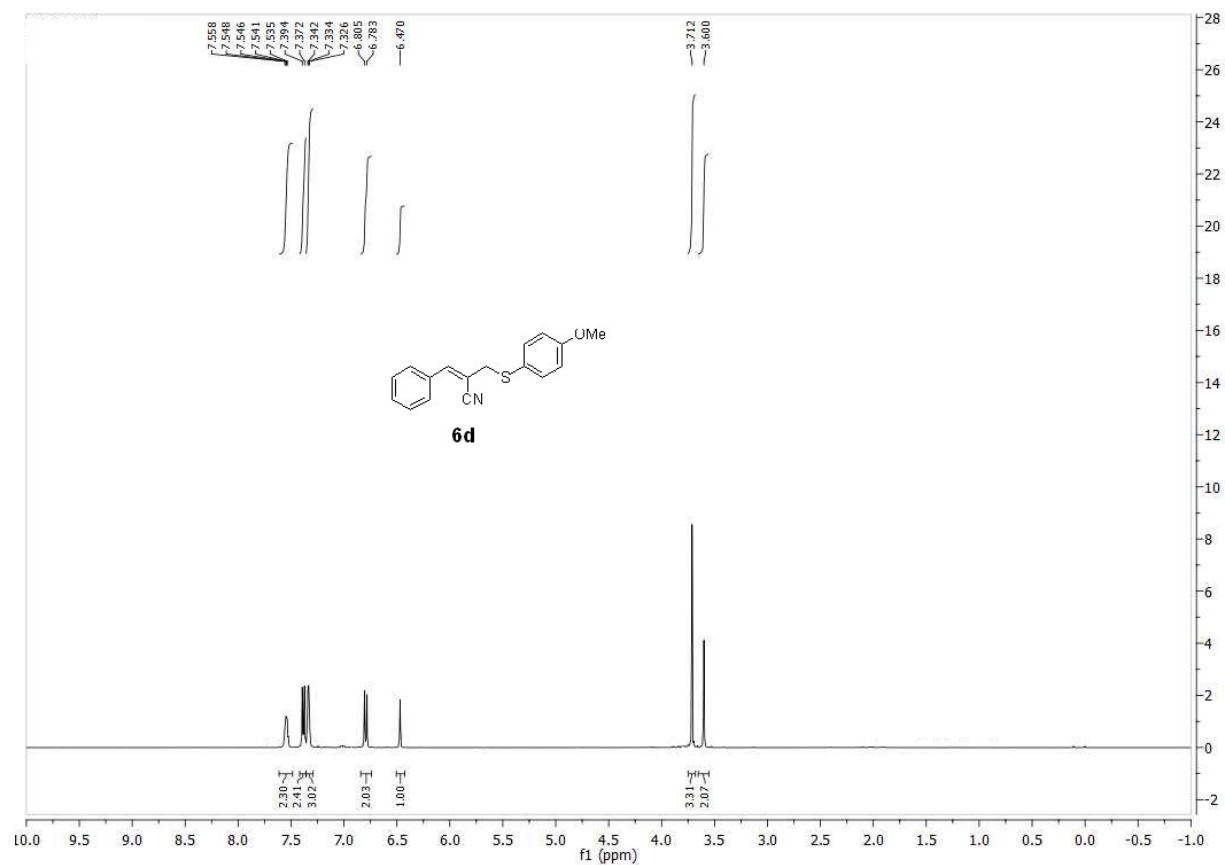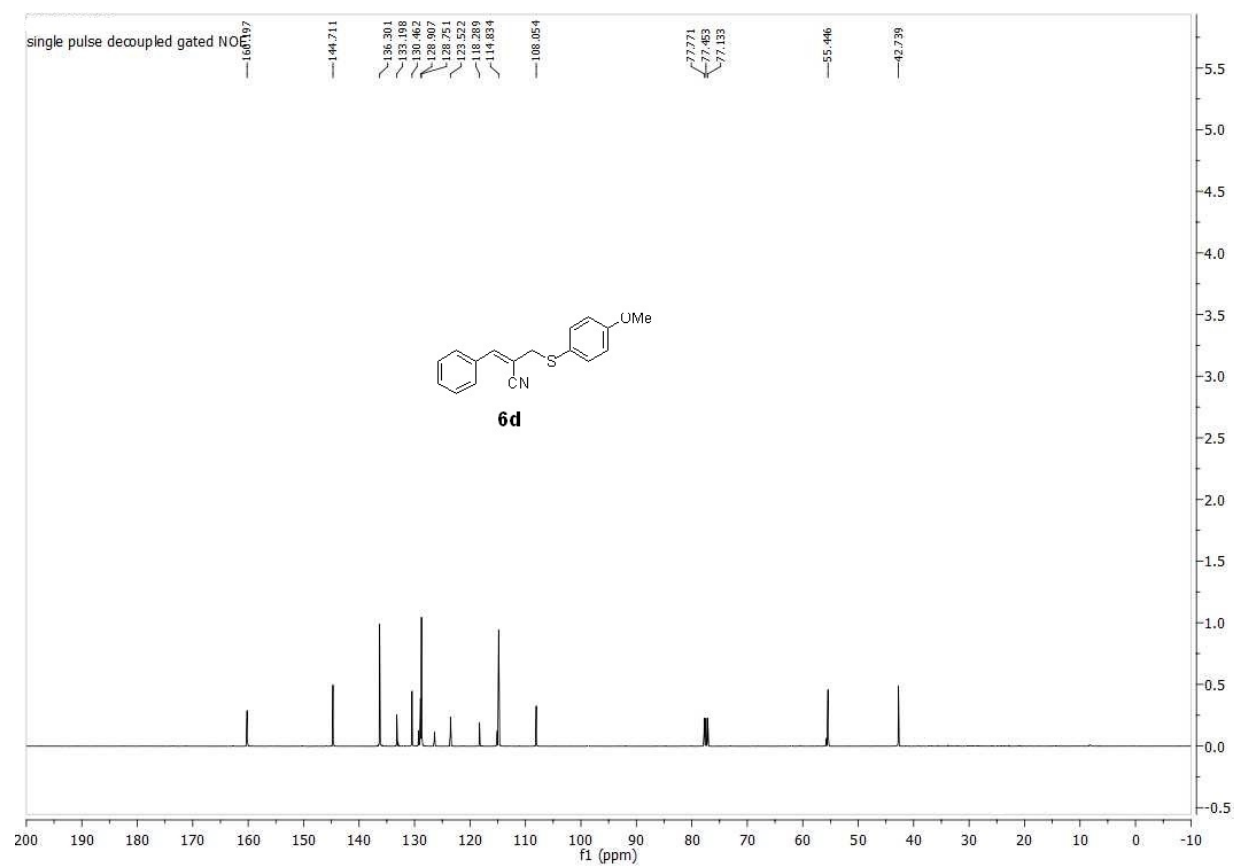

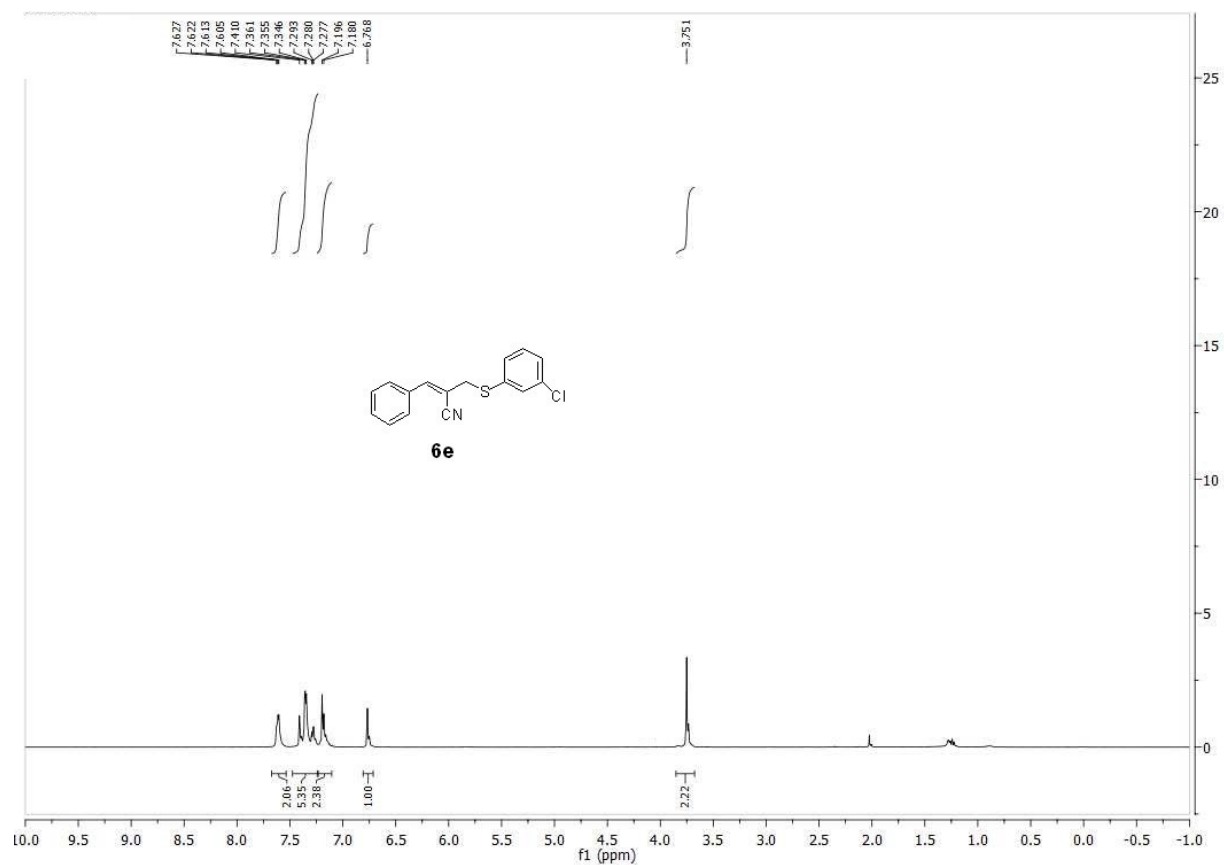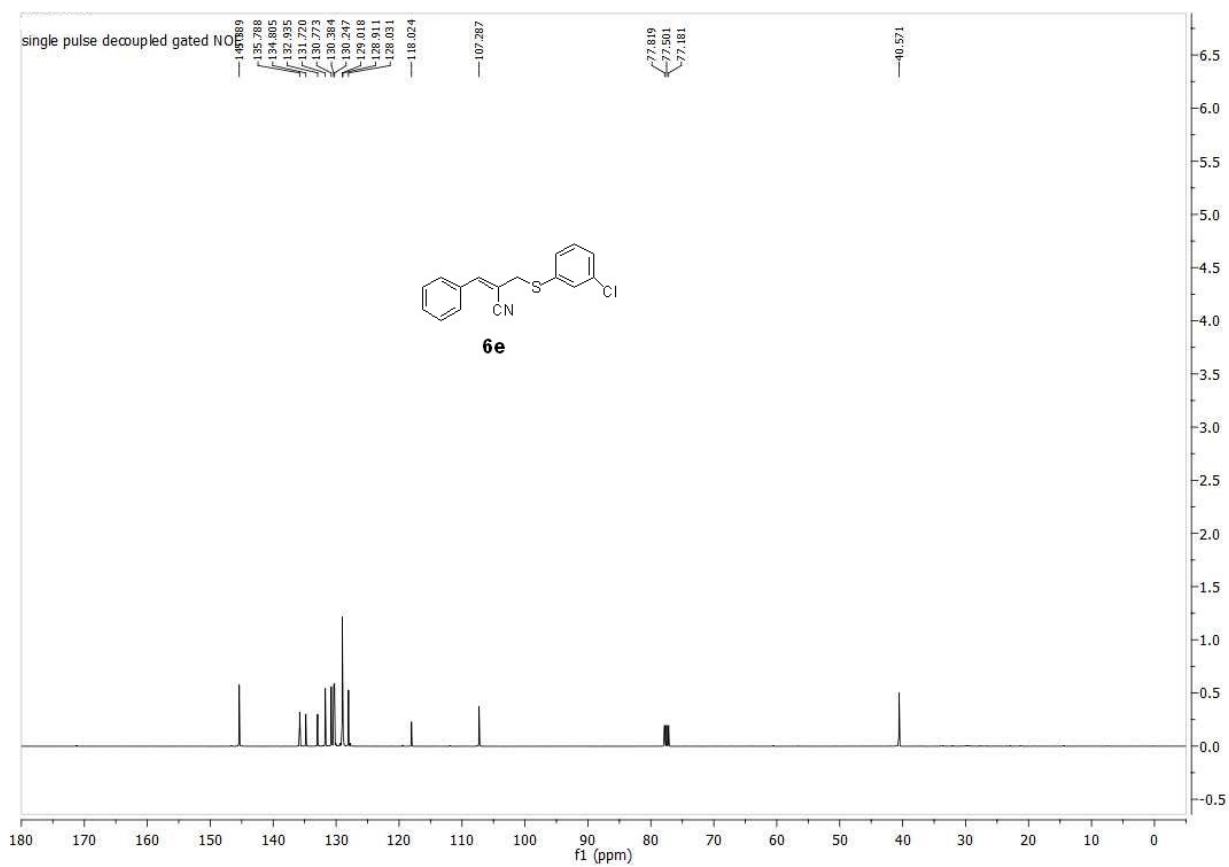

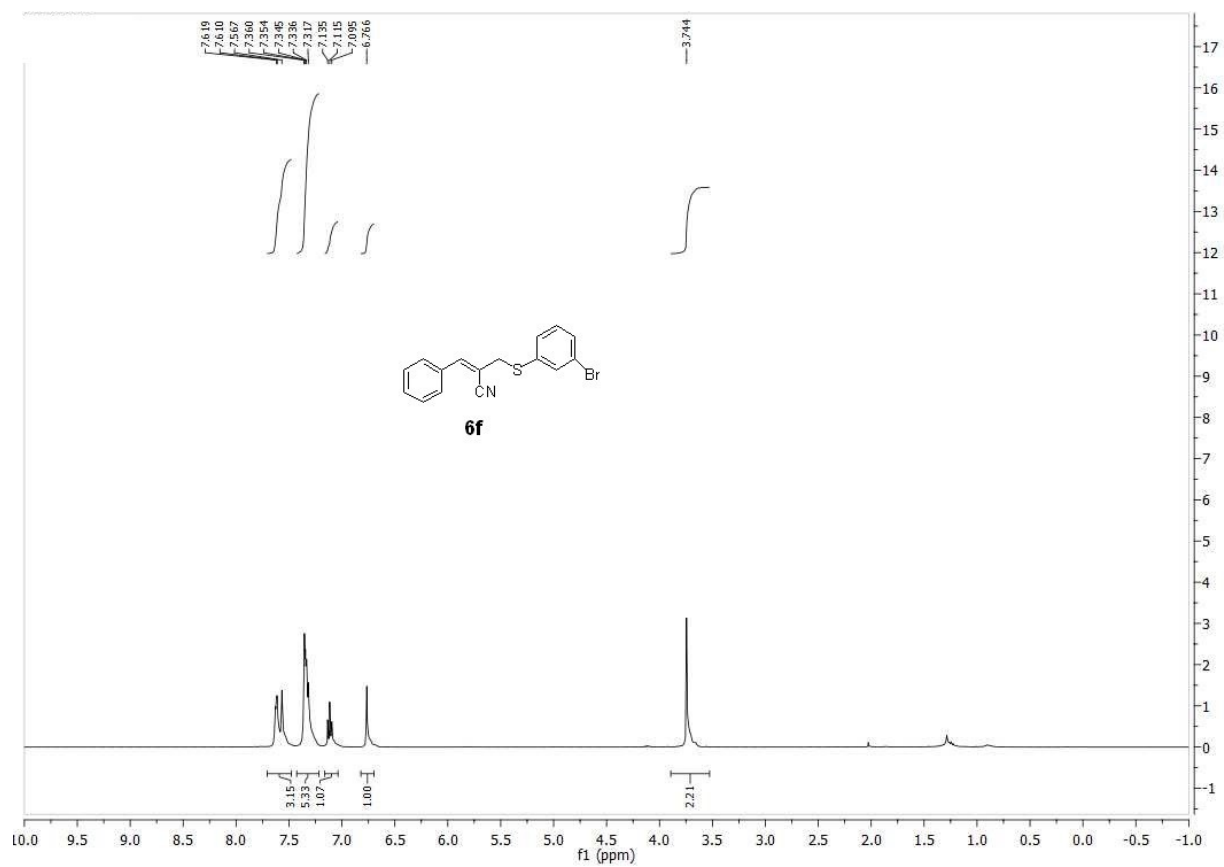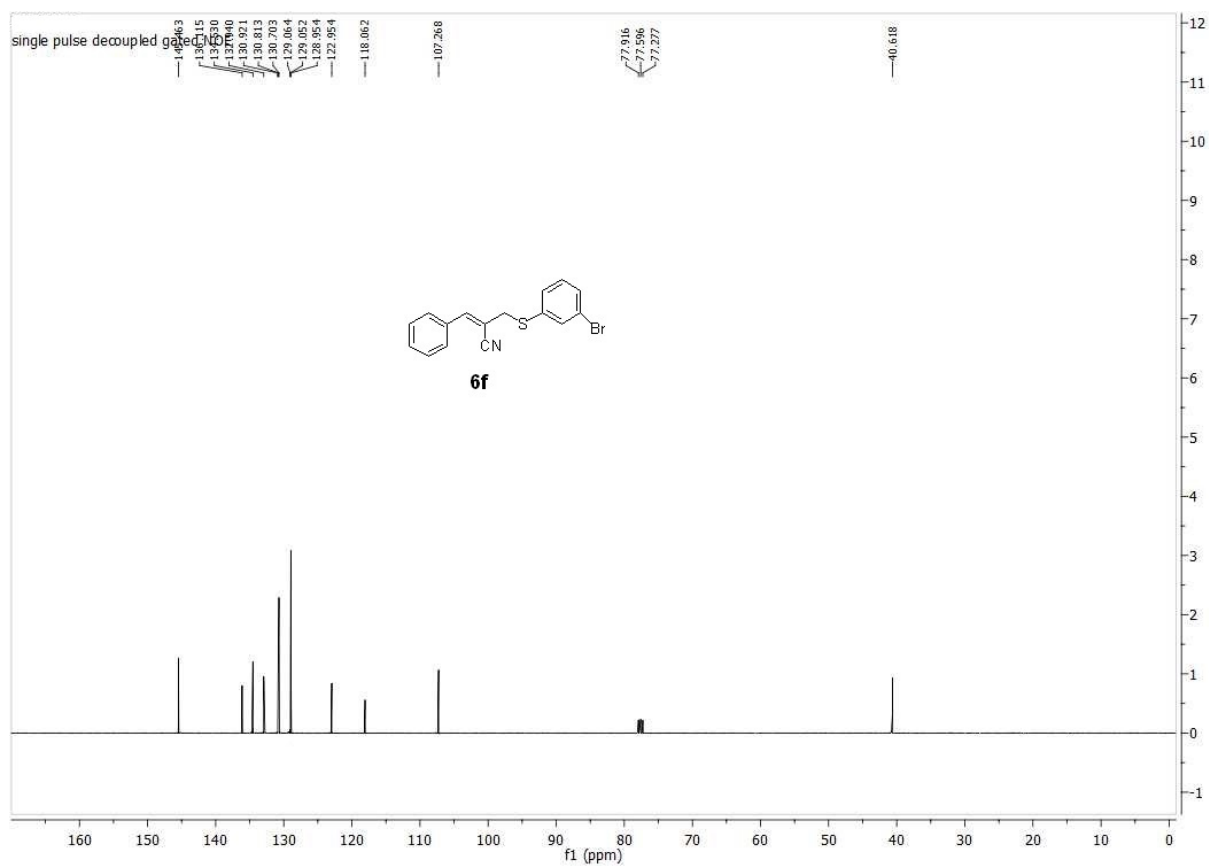

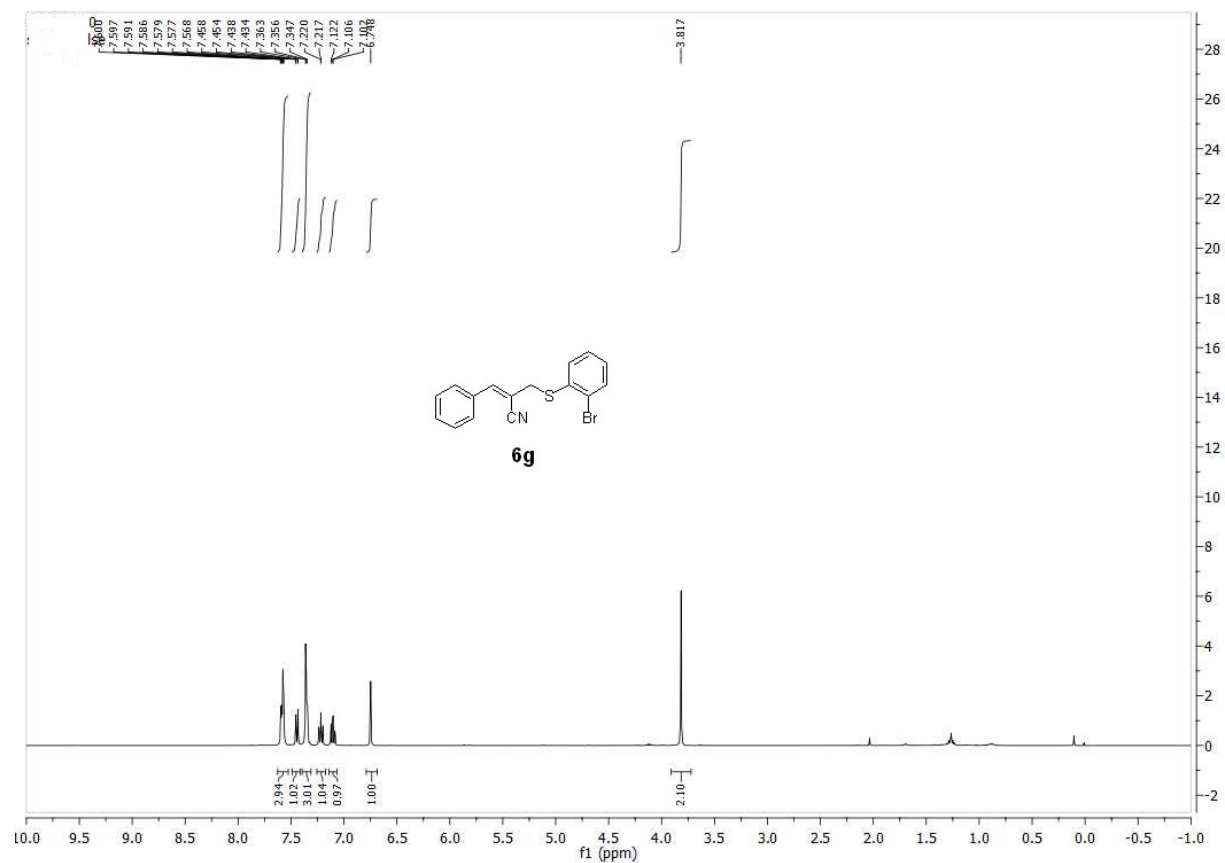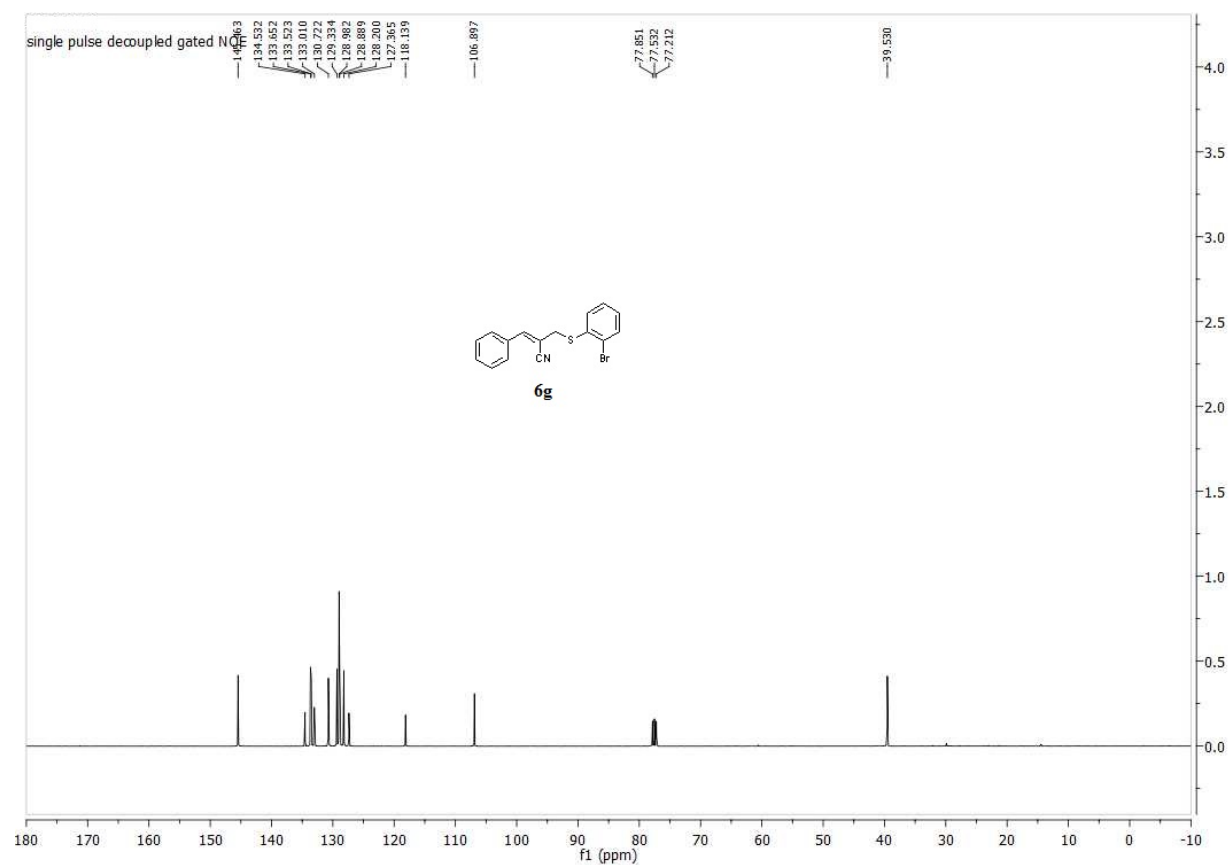



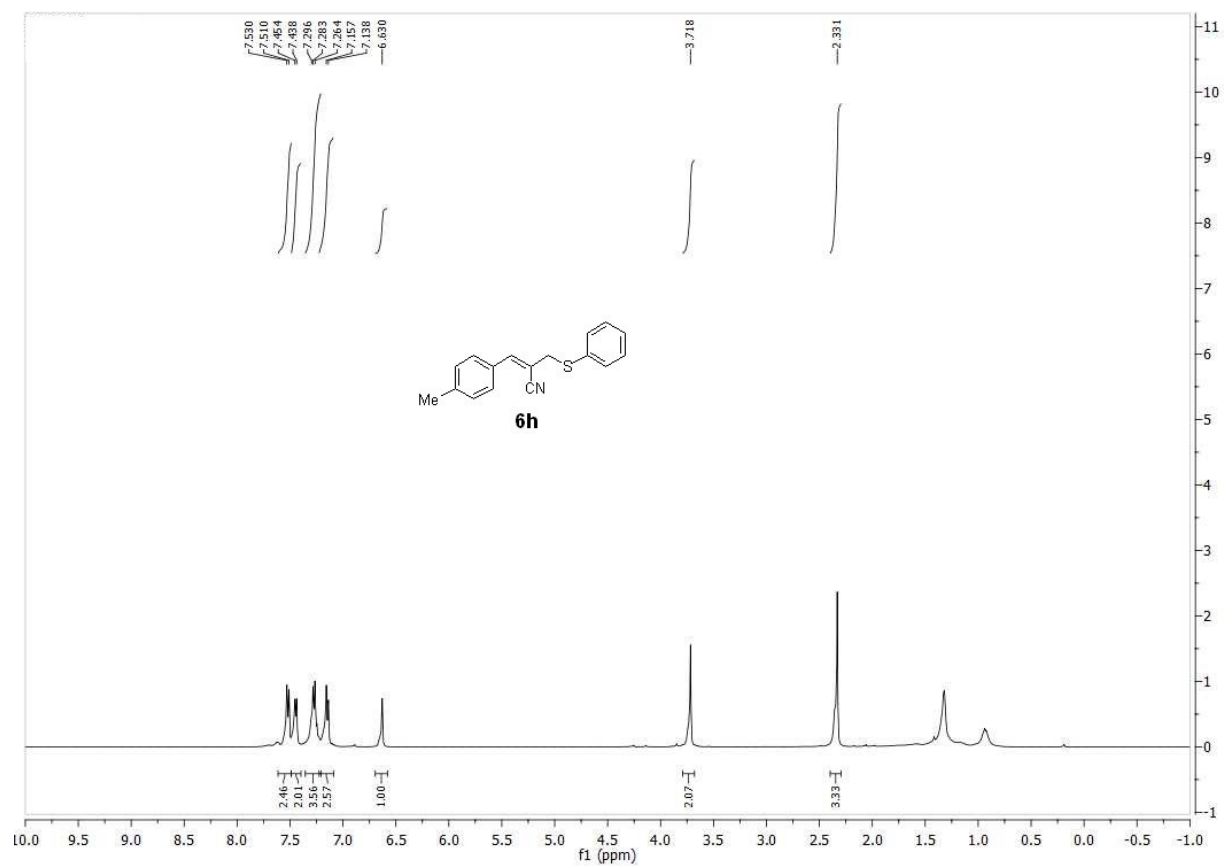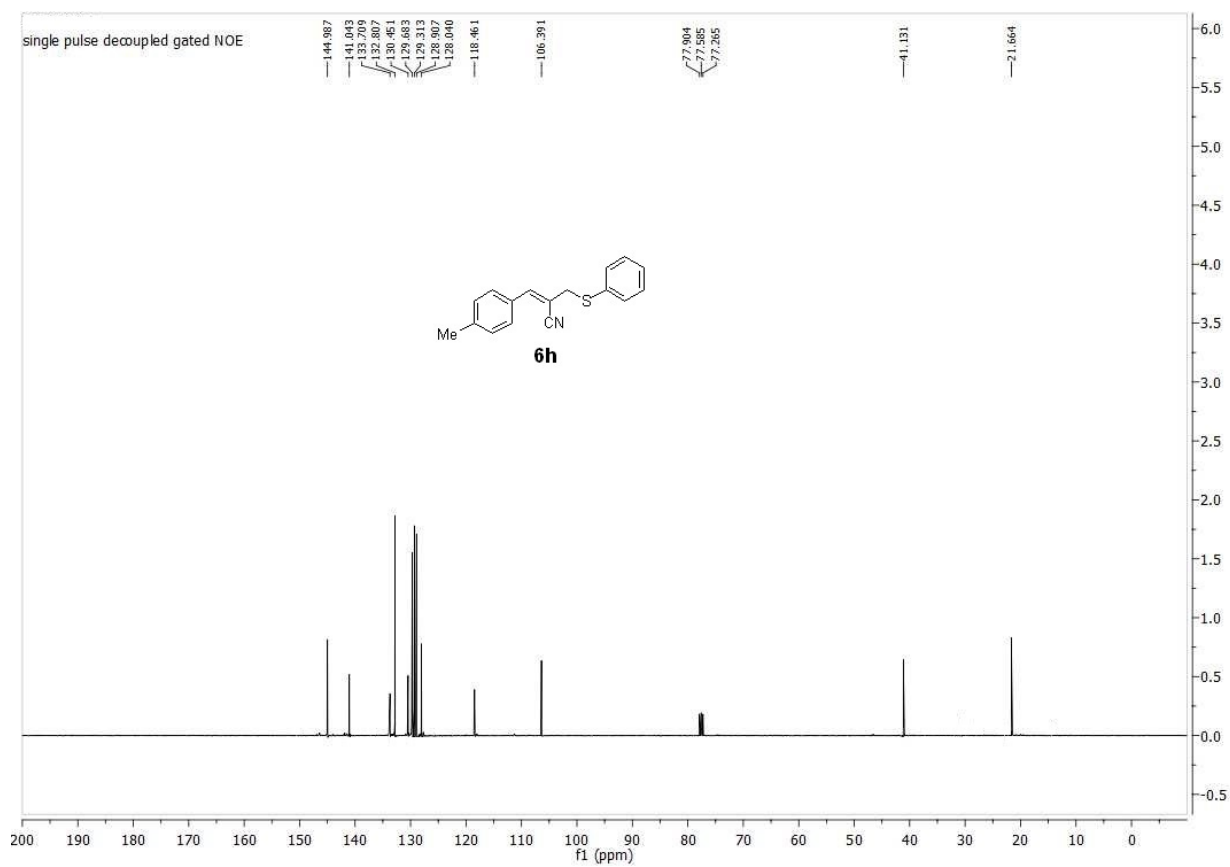

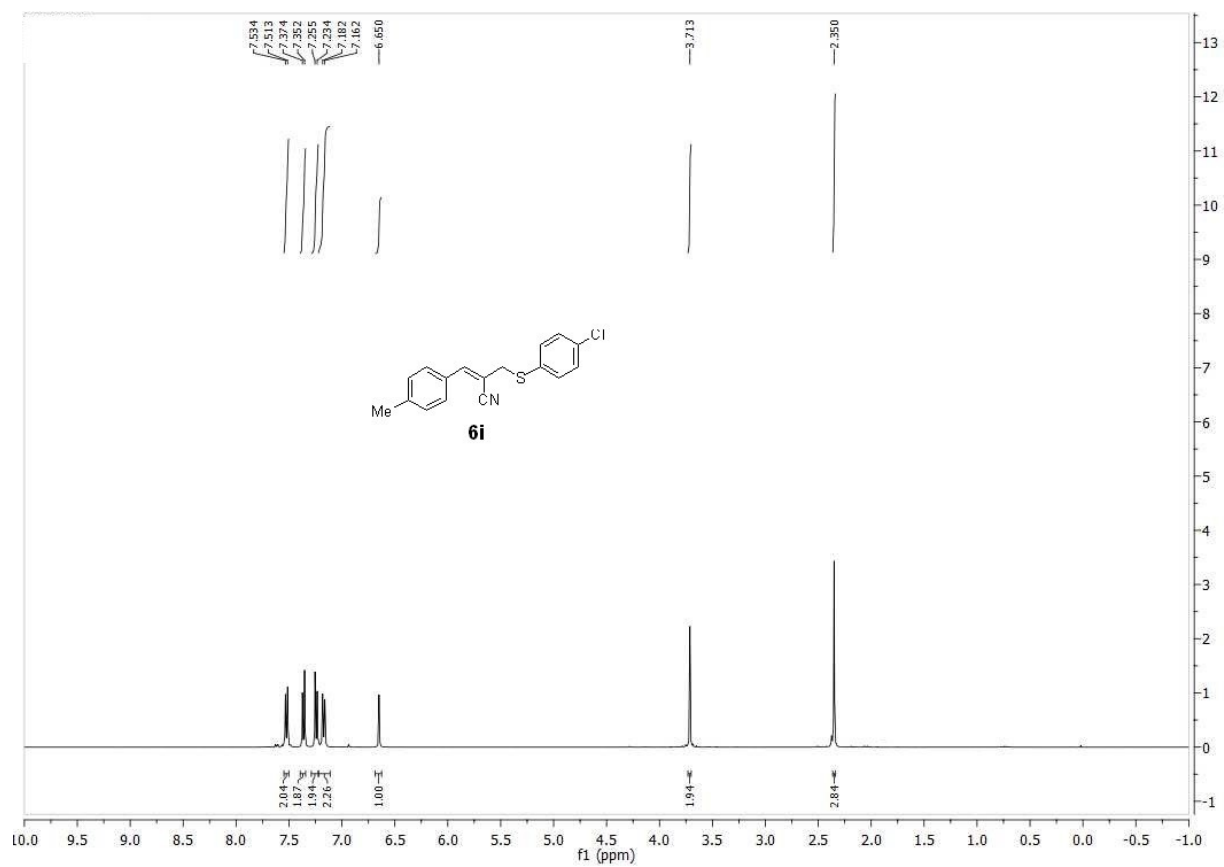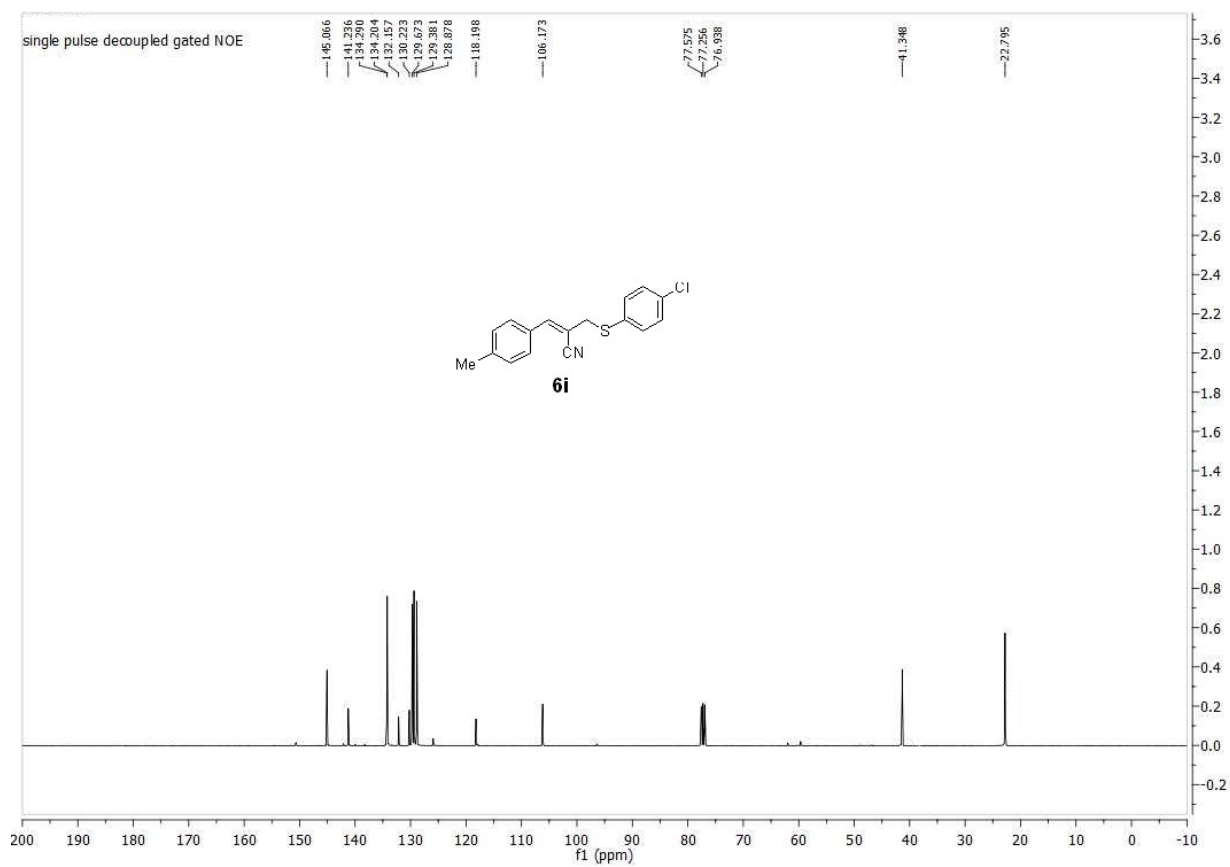

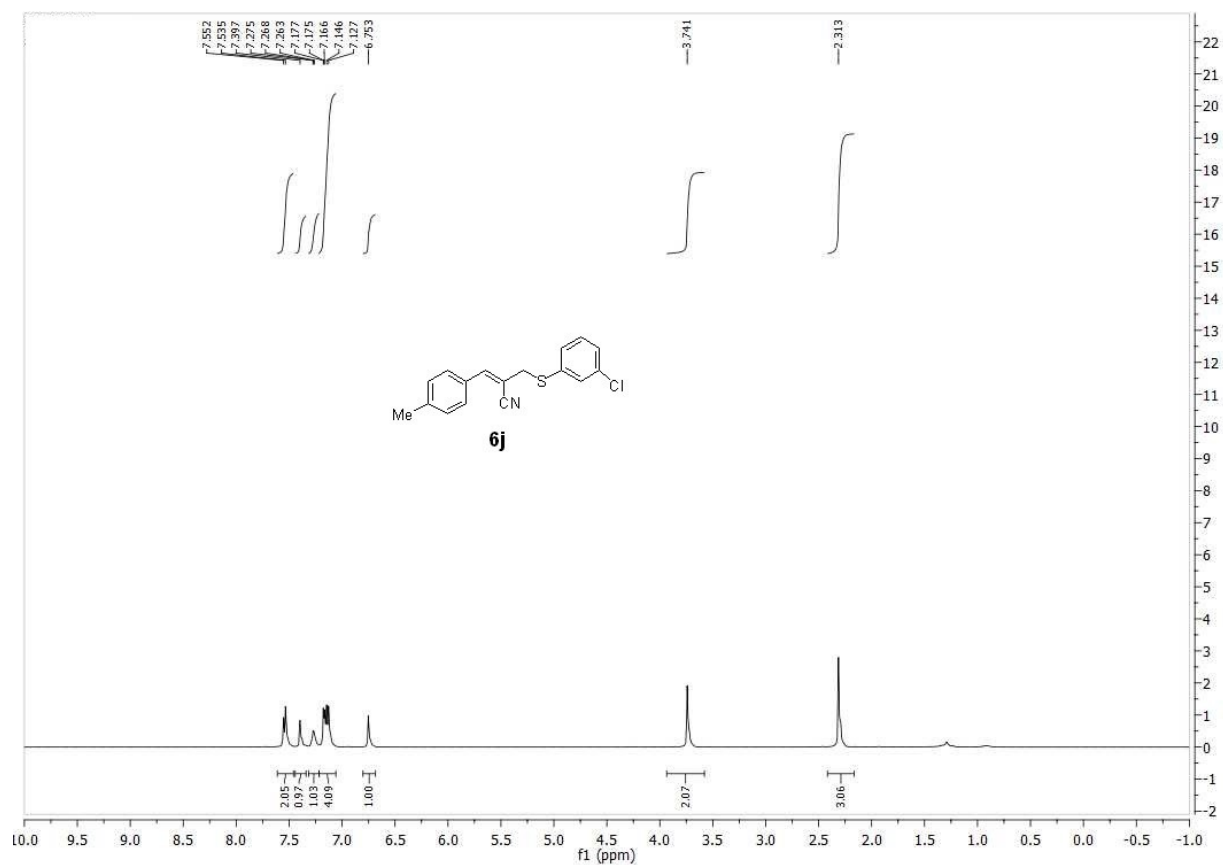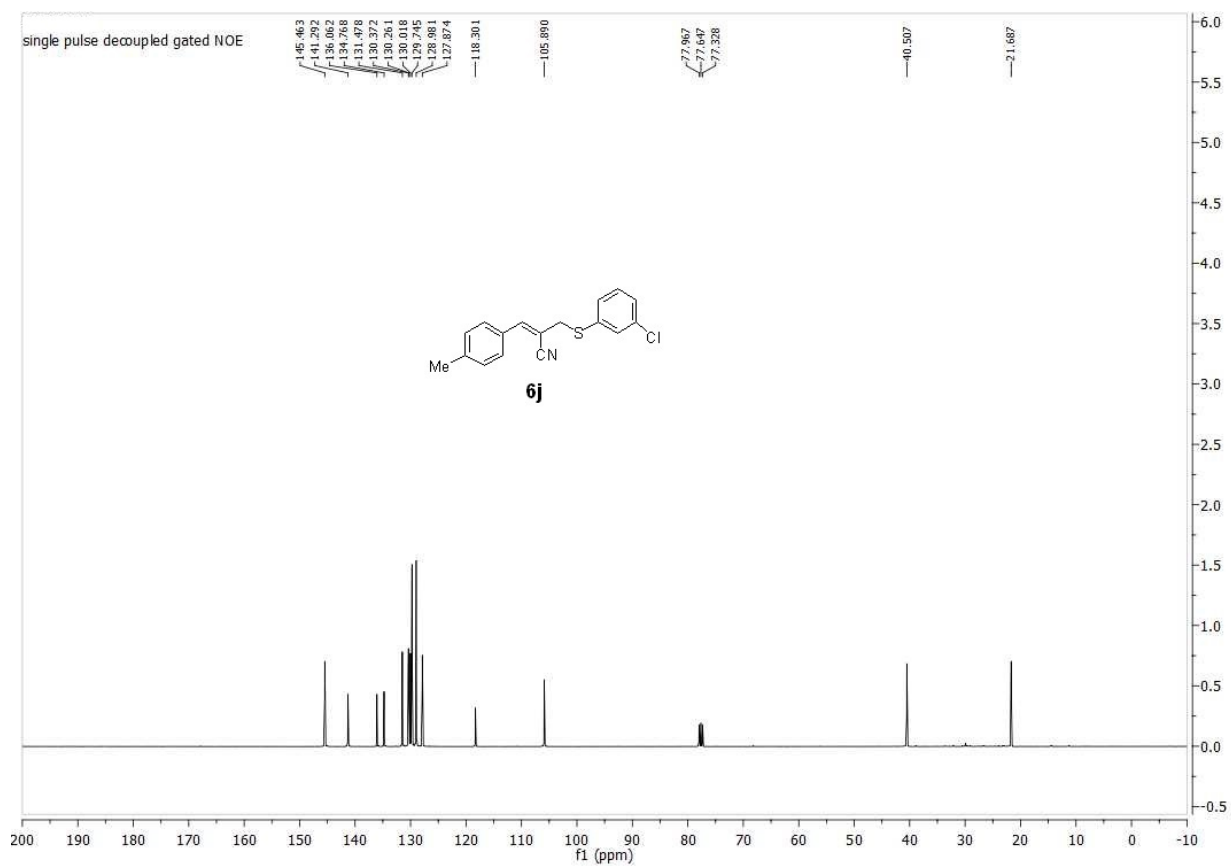

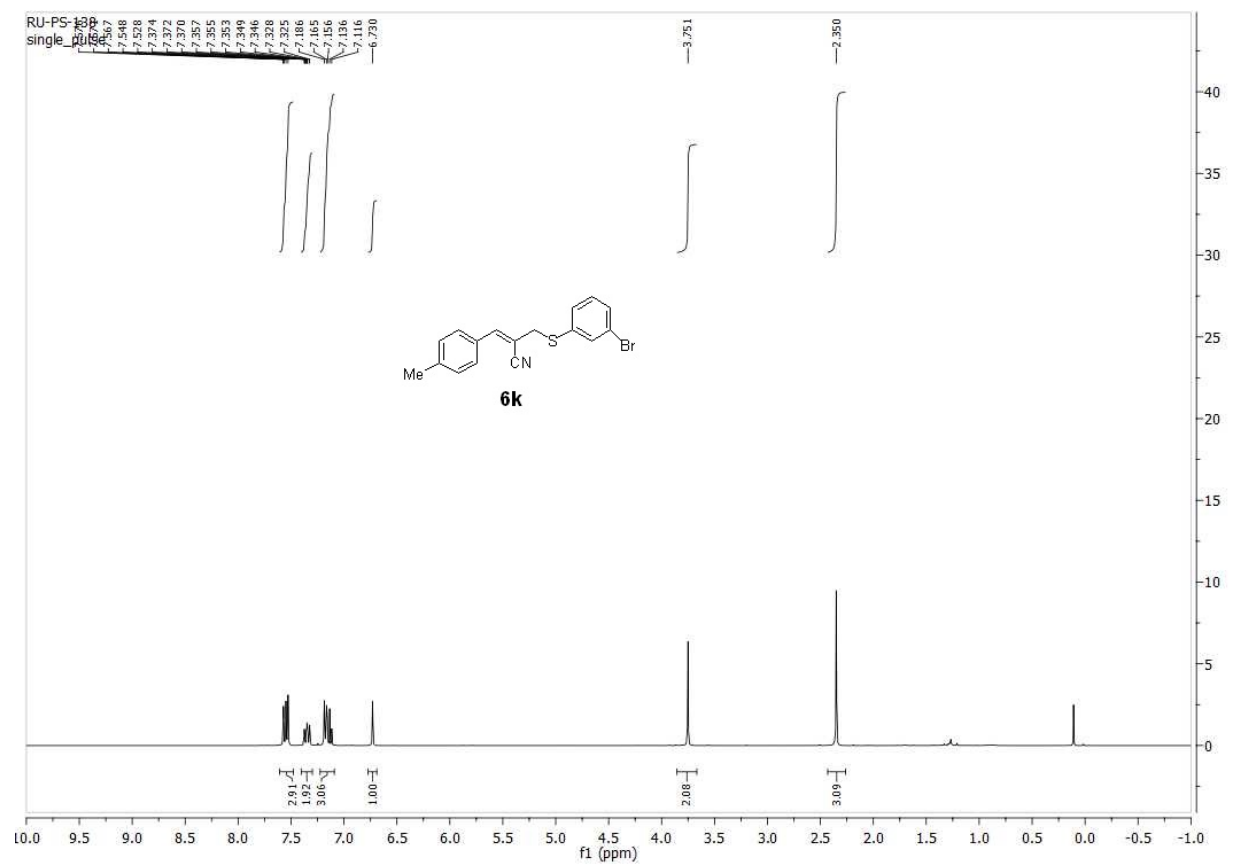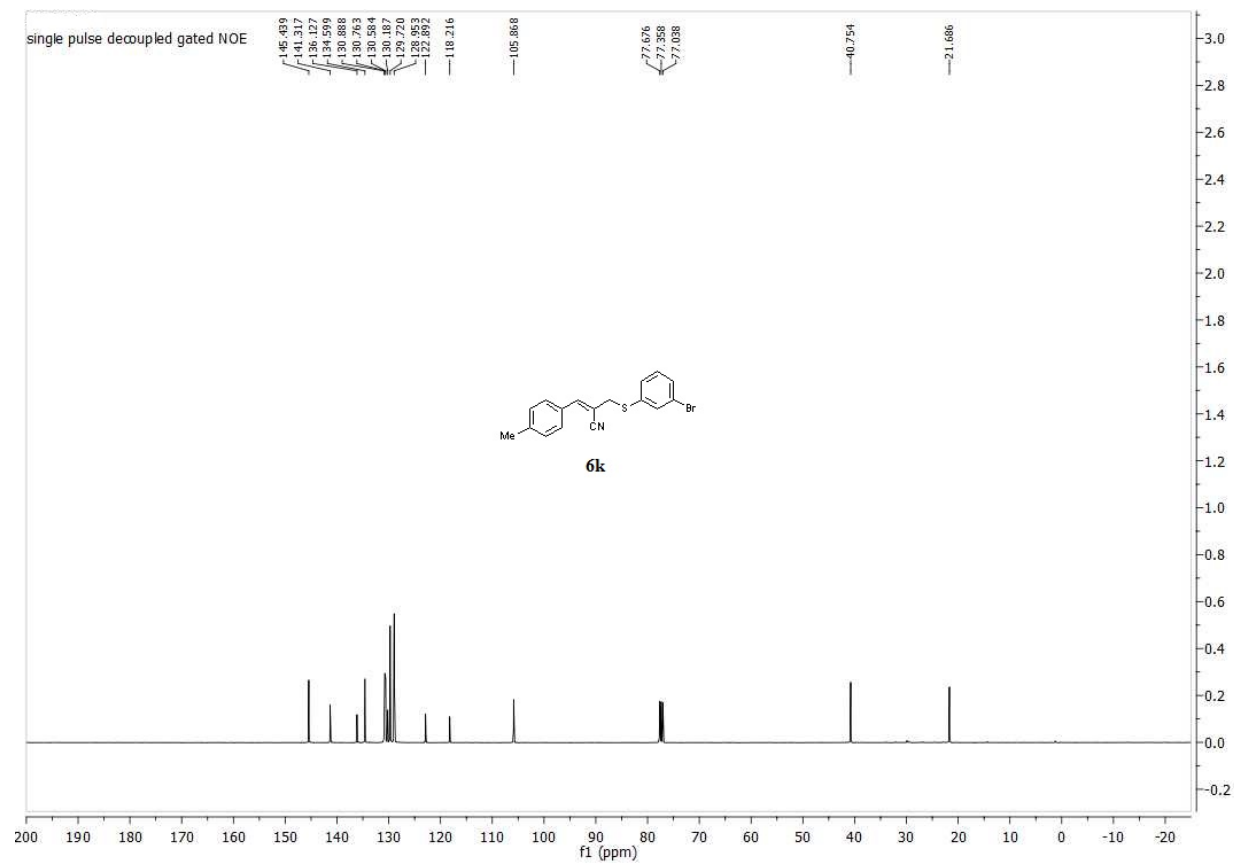

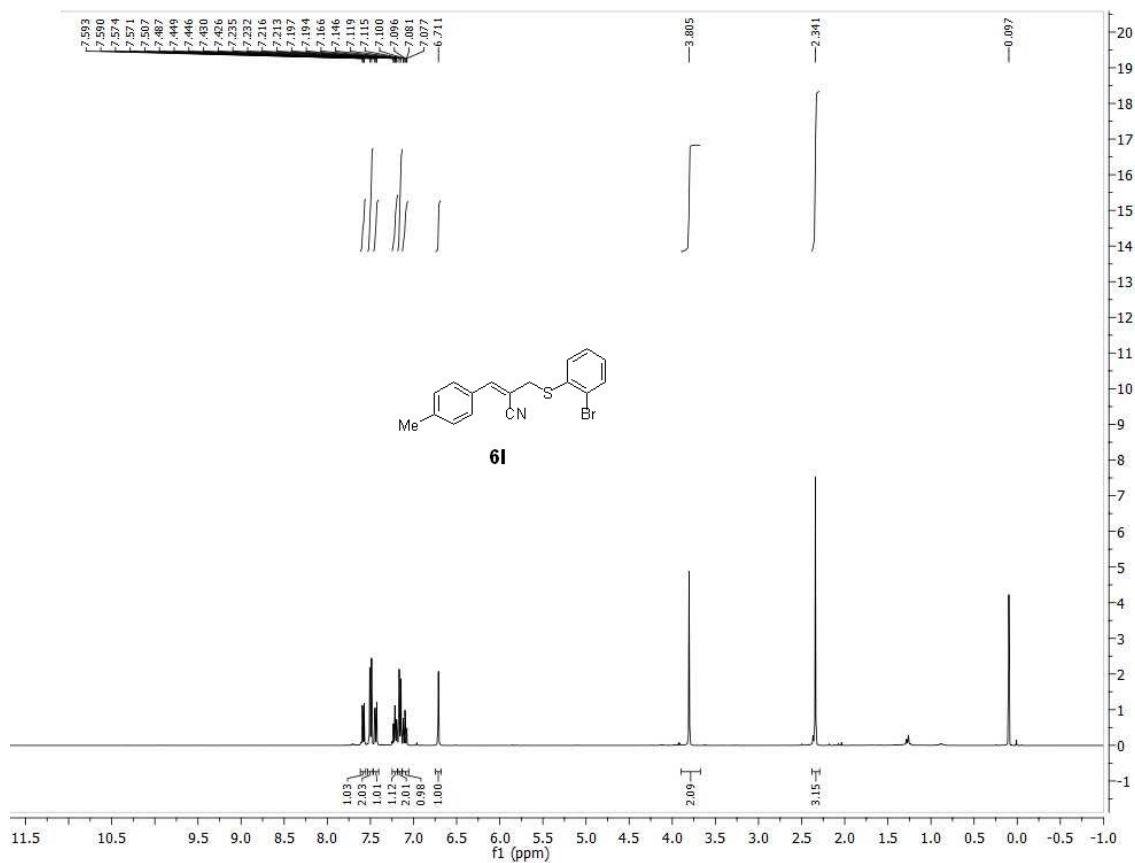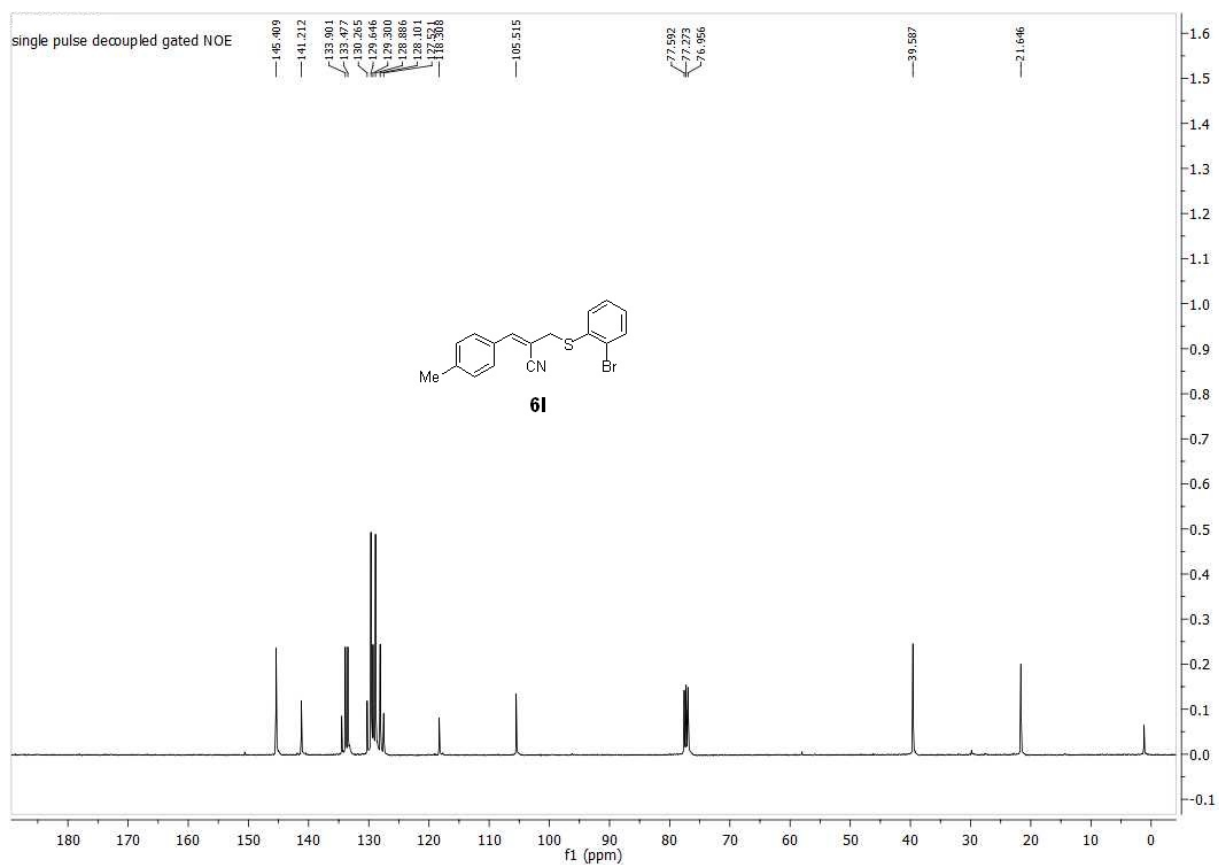

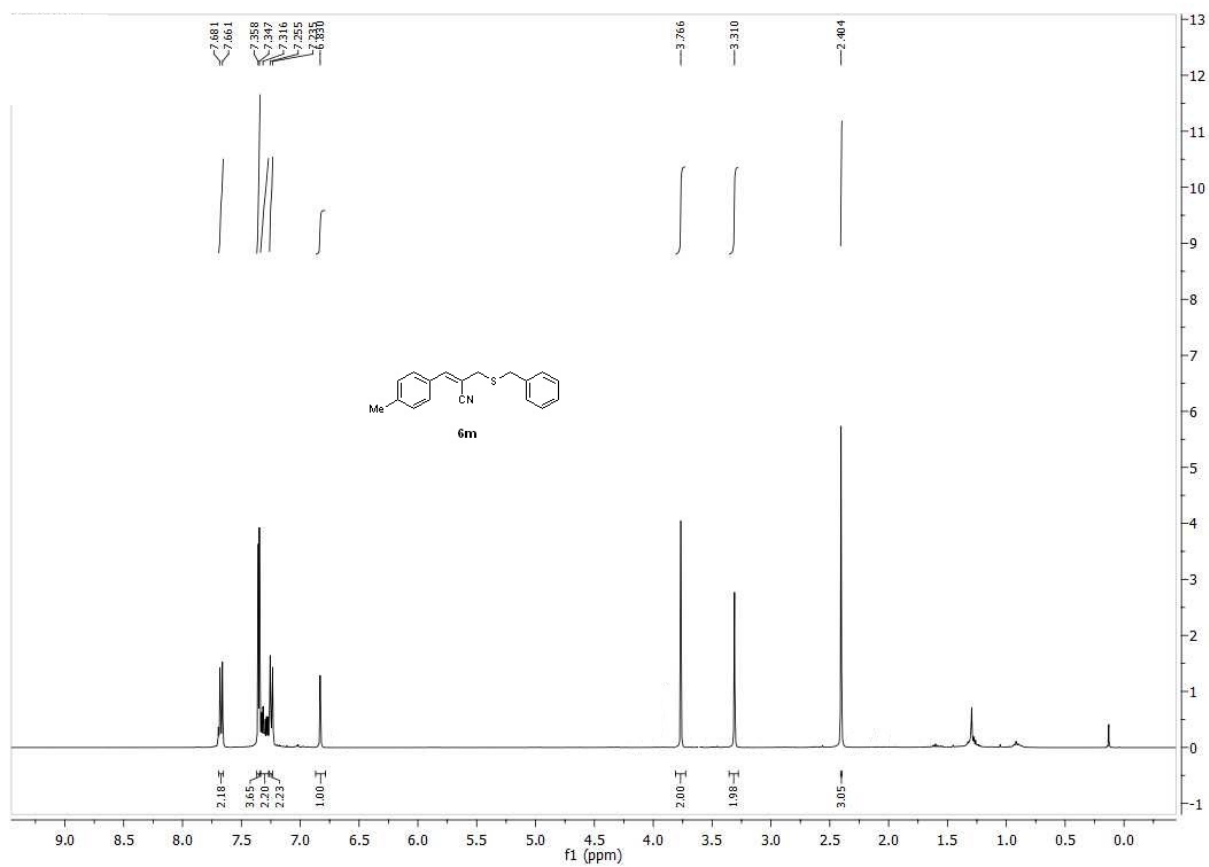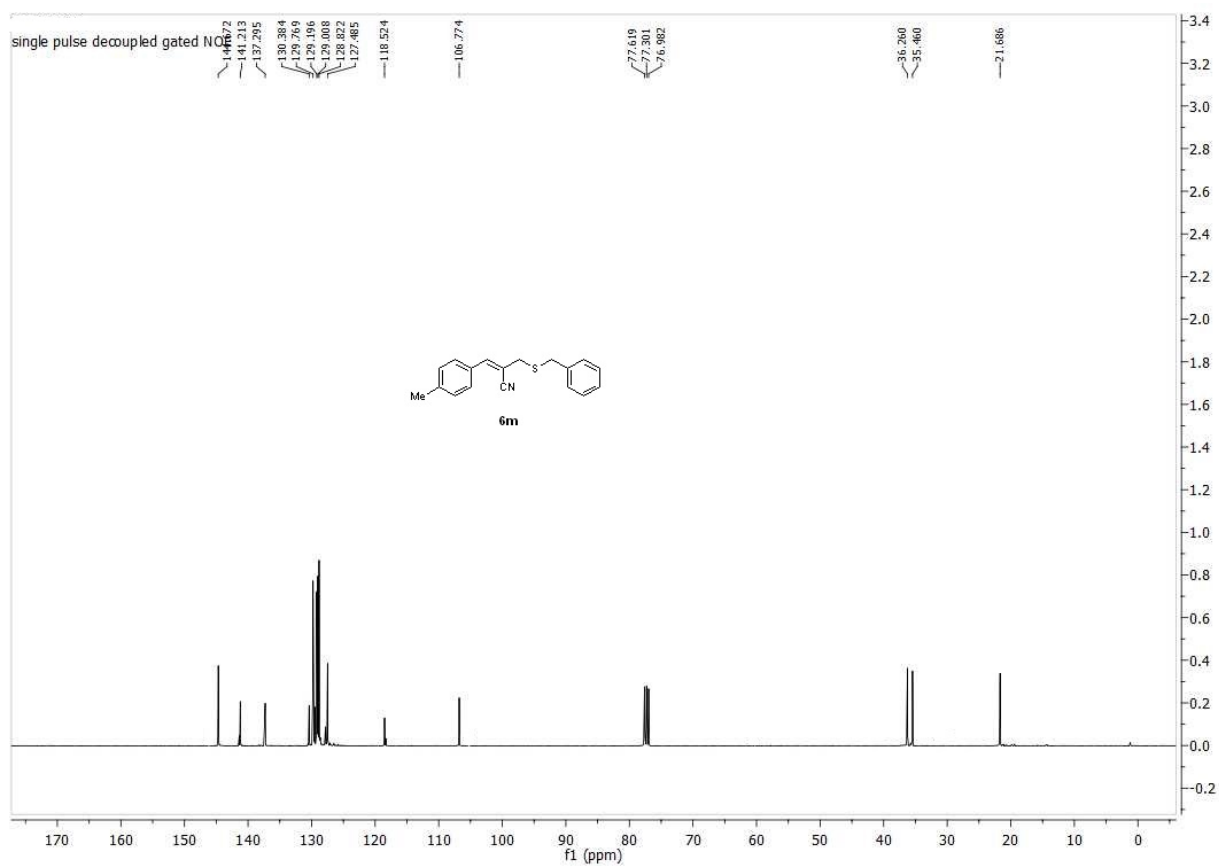

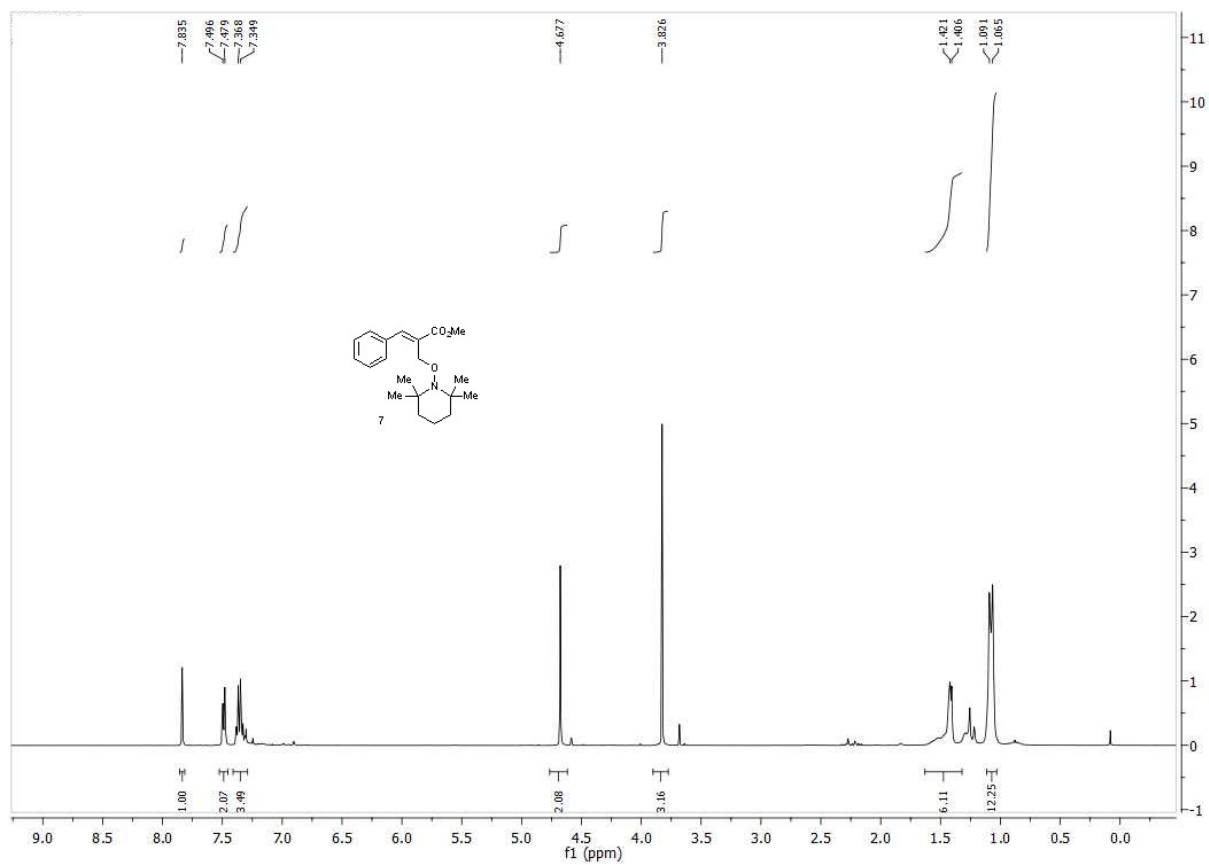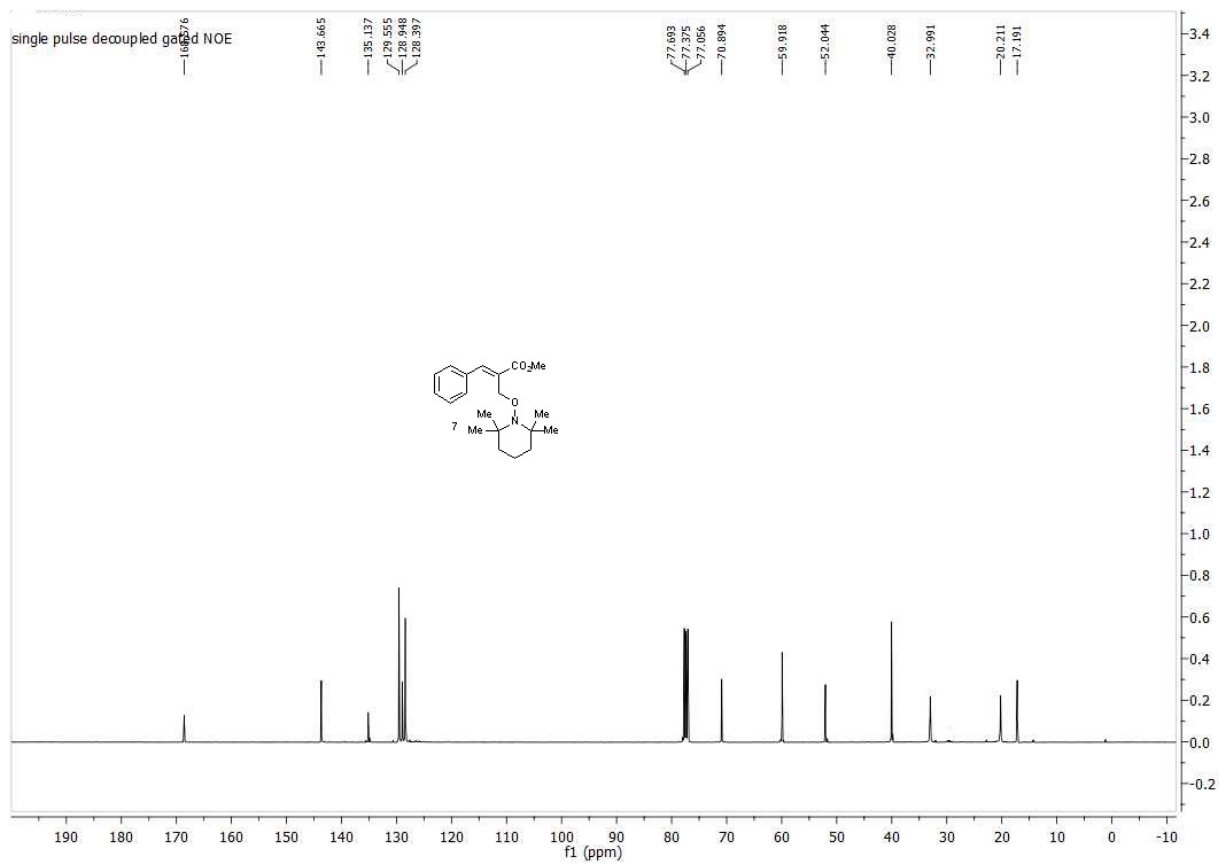

Supplement: c7ra04817c1.pdf [file c7ra04817c1.pdf]
